# Supplementary material
Source: publisher site journal article supplement (https://www.dovepress.com/article/174120)
Supplement: Supplementary file 1 [file get_supplementary_file.php]

## **Supplementary materials**

### **Online Supplement: 1-12**

#### **Efficacy and safety of chemopreventive agents on colorectal cancer incidence and mortality: systematic review and network meta-analysis**

Sajesh K Veetil, Peerawat Jinatongthai, Surakit Nathisuwan, Nattawat Teerawattanapong, Siew Mooi Ching, Kean Ghee Lim, Surasak Saokaew, Pochamana Phisalprapa, Christopher M. Reid, Nathorn Chaiyakunapruk

Co-corresponding author: Surakit Nathisuwan

Corresponding author: Nathorn Chaiyakunapruk

Version 28-06-2018

Number of pages: 101

This supplementary material has been provided by the authors to give readers additional information about their work.

## Online Supplementary Content

| Contents                                                                                                                                    | Page no |
|---------------------------------------------------------------------------------------------------------------------------------------------|---------|
| <b>Supplement 1: Search strategies</b>                                                                                                      | 4-7     |
| Table S1.1 Search algorithms for primary outcomes                                                                                           | 4-6     |
| Figure S1.1 PRISMA flow diagram for primary outcomes                                                                                        | 7       |
| <b>Supplement 2: Additional description of methods</b>                                                                                      | 8-14    |
| Table S2.1 Data available on request                                                                                                        | 9       |
| Methods S2.1 Strategies of data synthesis and statistical analysis                                                                          | 9-10    |
| Table S2.2 Description of data collection and analysis of studies                                                                           | 11-12   |
| Table S2.3 Assumptions of sensitivity analyses for network meta-analyses                                                                    | 12      |
| Methods S2.2 Description of net clinical benefit analysis                                                                                   | 12-14   |
| <b>Supplement 3: Characteristics and risk of bias assessment of included studies</b>                                                        | 15-54   |
| Table S3.1 Characteristics of RCTs reported early risk of CRC incidence                                                                     | 15-21   |
| Table S3.2 Population characteristics of RCTs reported early risk of CRC incidence                                                          | 22-24   |
| Table S3.3 Efficacy and safety outcomes of RCTs reported early risk of CRC incidence                                                        | 25-27   |
| Table S3.4 Risk of bias assessment of RCTs reported early risk of CRC incidence                                                             | 28-29   |
| Table S3.5 Characteristics of RCTs reported either long-term risk of CRC incidence or mortality                                             | 30-33   |
| Table S3.6 Population characteristics of RCTs reported either long-term risk of CRC incidence or mortality                                  | 34-35   |
| Table S3.7 Efficacy and safety outcomes of RCTs reported either long-term risk of CRC incidence or mortality                                | 36-37   |
| Table S3.8 Risk of bias assessment of RCTs reported either long-term risk of CRC incidence or mortality                                     | 38-39   |
| Table S3.9 Description and search strategy for safety outcomes                                                                              | 40-41   |
| Table S3.10 Characteristics of RCTs on aspirin reported safety outcomes                                                                     | 43-48   |
| Figure S3.1 Literature search diagram for safety outcomes                                                                                   | 42      |
| Table S3.11 RCTs reported efficacy and safety outcomes of any anti-oxidants                                                                 | 49-51   |
| Table S3.12 RCTs reported efficacy and safety outcomes of folic acid                                                                        | 52-54   |
| <b>Supplement 4: Pairwise meta-analysis of chemopreventive agents (CPAs)</b>                                                                | 55-58   |
| Table S4.1 Pairwise meta-analyses: early risk of CRC incidence                                                                              | 55      |
| Table S4.2 Pairwise meta-analyses: long-term risk of CRC incidence and mortality                                                            | 56-57   |
| Table S4.3 Pairwise meta-analyses: Safety outcomes                                                                                          | 58      |
| <b>Supplement 5: Network meta-analyses of CPAs: Early risk of CRC incidence</b>                                                             | 59-63   |
| Figure S5.1 Network plot of CPAs: early risk of CRC incidence                                                                               | 59      |
| Table S5.1 Results of network meta-analysis: early risk of CRC incidence                                                                    | 60      |
| Figure S5.2: SUCRA ranking curve for early risk of CRC incidence                                                                            | 61      |
| Figure S5.3 Pairwise (upper right portion) and network (lower left portion) meta-analytic results for early risk of CRC incidence           | 62      |
| Table S5.2 Results of sensitivity analyses of network meta-analysis: early risk of CRC incidence                                            | 63      |
| <b>Supplement 6: Network meta-analyses of CPAs: Long-term risk of CRC incidence</b>                                                         | 64-68   |
| Figure S6.1 Network plot of CPAs: long-term risk of CRC incidence                                                                           | 64      |
| Table S6.1 Results of network meta-analysis: long-term risk of CRC incidence                                                                | 65      |
| Figure S6.2 SUCRA ranking curve for long-term risk of CRC incidence                                                                         | 66      |
| Figure S6.3 Pairwise (upper right portion) and network (lower left portion) meta-analytic results for long-term risk of CRC incidence       | 67      |
| Table S6.2 Results of sensitivity analyses of network meta-analysis: long-term risk of CRC incidence                                        | 68      |
| <b>Supplement 7: Network meta-analyses of CPAs: Long-term risk of CRC mortality</b>                                                         | 69-73   |
| Figure S7.1 Network plot of CPAs: long-term risk of CRC mortality                                                                           | 69      |
| Table S7.1 Results of network meta-analysis: long-term risk of CRC mortality                                                                | 70      |
| Figure S7.2 SUCRA ranking curve: : long-term risk of CRC mortality                                                                          | 71      |
| Figure S7.3 Pairwise (upper right portion) and network (lower left portion) meta-analytic results for long-term colorectal cancer mortality | 72      |
| Table S7.2 Results of sensitivity analyses of network meta-analysis: long-term risk of CRC mortality                                        | 73      |
| <b>Supplement 8: Network meta-analysis of safety outcomes</b>                                                                               | 74-79   |
| Figure S8.1 Network plot of CPAs: Major GI bleeding events                                                                                  | 74      |
| Table S8.1 Results of network meta-analysis: Major GI bleeding events                                                                       | 74      |
| Figure S8.2 SUCRA ranking curve: Major GI bleeding events                                                                                   | 75      |
| Figure S8.3 Pairwise (upper right portion) and network (lower left portion) meta-analytic results: Major GI bleeding events                 | 76      |
| Figure S8.4 Network plot of CPAs: CV mortality                                                                                              | 77      |

|                                                                                                                                    |        |
|------------------------------------------------------------------------------------------------------------------------------------|--------|
| Table S8.2 Results of network meta-analysis: CV mortality                                                                          | 77     |
| Figure S8.5 SUCRA ranking curve: CV mortality                                                                                      | 78     |
| Figure S8.6 Pairwise (upper right portion) and network (lower left portion) meta-analytic results: CV mortality                    | 79     |
| <b>Supplement 9: Assessment of inconsistency for each outcome network</b>                                                          | 80-81  |
| Table S9.1 Assessment of inconsistency: early risk of CRC incidence                                                                | 80     |
| Table S9.2 Assessment of inconsistency: long-term risk of CRC incidence or mortality                                               | 80     |
| Table S9.3 Assessment of inconsistency: safety outcomes                                                                            | 81     |
| <b>Supplement 10: Comparison-adjusted funnel plot for each outcome form the network meta-analyses</b>                              | 82-85  |
| Figure S10.1 Comparison-adjusted funnel plots from the network meta-analyses: early risk of CRC incidence                          | 82     |
| Figure S10.2 Comparison-adjusted funnel plots from the network meta-analyses: long-term risk of CRC incidence                      | 83     |
| Figure S10.3 Comparison-adjusted funnel plots from the network meta-analyses: long-term risk of CRC mortality                      | 84     |
| Figure S10.4 Comparison-adjusted funnel plots from the network meta-analyses: incidence of major gastrointestinal bleeding         | 85     |
| Figure S10.5 Comparison-adjusted funnel plots from the network meta-analyses: CV mortality                                         | 85     |
| <b>Supplement 11: GRADE Summary of evidence</b>                                                                                    | 86-87  |
| <b>Supplement 12: Net clinical benefit analysis</b>                                                                                | 88-93  |
| Table S12.1 Pooled risk estimates and net clinical benefit of treatment options compared with placebo                              | 88     |
| Table S12.2 Combined risk estimates of mortality from CRC and CV and pooled risk estimates of major GI bleeding (for scatter plot) | 89     |
| Figure S12.1 Sensitivity analyses of net clinical benefit by varying weighting factors from 0.01 to 0.16                           | 90     |
| Method 12.1: Explanation why low-dose aspirin was gained the most clinical benefit?                                                | 91     |
| Figure S12.2 Threshold analyses by varying the weight for case-fatality ratio of GI bleeding                                       | 92     |
| Figure S12.3 Threshold analyses by varying the incidence of GI bleeding                                                            | 93     |
| <b>eReference</b>                                                                                                                  | 94-101 |

## Supplement 1: Search strategies

**Table S1.1- Search algorithms for primary outcomes**

| Search algorithms as per the parent study design (Medline) |                                                                                                                                                                           |
|------------------------------------------------------------|---------------------------------------------------------------------------------------------------------------------------------------------------------------------------|
| #1                                                         | Adenoma                                                                                                                                                                   |
| #2                                                         | Adenoma\$                                                                                                                                                                 |
| #3                                                         | Adenocarcinoma                                                                                                                                                            |
| #4                                                         | Adenomatous\$                                                                                                                                                             |
| #5                                                         | Adenomatous polyps                                                                                                                                                        |
| #6                                                         | Colon cancer\$                                                                                                                                                            |
| #7                                                         | Colon neoplas\$                                                                                                                                                           |
| #8                                                         | Colon tumor\$                                                                                                                                                             |
| #9                                                         | Colonic cancer\$                                                                                                                                                          |
| #10                                                        | Colonic neoplas\$                                                                                                                                                         |
| #11                                                        | Colonic neoplasms                                                                                                                                                         |
| #12                                                        | Colonic polyps                                                                                                                                                            |
| #13                                                        | Colonic tumor\$                                                                                                                                                           |
| #14                                                        | Colorectal cancer\$                                                                                                                                                       |
| #15                                                        | Colorectal neoplas\$                                                                                                                                                      |
| #16                                                        | Colorectal neoplasms                                                                                                                                                      |
| #17                                                        | Colorectal tumor\$                                                                                                                                                        |
| #18                                                        | Intestinal polyps                                                                                                                                                         |
| #19                                                        | Polyp\$                                                                                                                                                                   |
| #20                                                        | Rectal cancer\$                                                                                                                                                           |
| #21                                                        | Rectal neoplas\$                                                                                                                                                          |
| #22                                                        | Rectal neoplasms                                                                                                                                                          |
| #23                                                        | Rectal tumor\$                                                                                                                                                            |
| #24                                                        | Rectum cancer\$                                                                                                                                                           |
| #25                                                        | Rectum neoplas\$                                                                                                                                                          |
| #26                                                        | Rectum tumor\$                                                                                                                                                            |
| #27                                                        | #1 OR #2 OR #3 OR #4 OR #5 OR #6 OR #7 OR #8 OR #9 OR #10 OR #11 OR #12 OR #13 OR #14 OR #15 OR #16 OR #17 OR #18 OR #19 OR #20 OR #21 OR #22 OR #23 OR #24 OR #25 OR #26 |
| #28                                                        | Aspirin                                                                                                                                                                   |
| #29                                                        | Acetylsalicylic acid                                                                                                                                                      |
| #30                                                        | COX-1 inhibitor\$                                                                                                                                                         |
| #31                                                        | COX-2 inhibitor\$                                                                                                                                                         |
| #32                                                        | COX-2 selective inhibitor\$                                                                                                                                               |
| #33                                                        | Coxib\$                                                                                                                                                                   |
| #34                                                        | Cyclooxygenase 1 inhibitor\$                                                                                                                                              |
| #35                                                        | Cyclooxygenase 2 inhibitor\$                                                                                                                                              |
| #36                                                        | Cyclooxygenase 2 inhibitors                                                                                                                                               |

|     |                                                                                                                            |
|-----|----------------------------------------------------------------------------------------------------------------------------|
| #37 | Cyclooxygenase inhibitor\$                                                                                                 |
| #38 | Cyclo-oxygenase inhibitor\$                                                                                                |
| #39 | Cyclooxygenase inhibitors                                                                                                  |
| #40 | Nonsteroidal antiinflammatory\$                                                                                            |
| #41 | Non-steroidal antiinflammatory\$                                                                                           |
| #42 | Nonsteroidal anti-inflammatory\$                                                                                           |
| #43 | Non-steroidal anti-inflammatory\$                                                                                          |
| #44 | Anti-inflammatory agents, non-steroidal                                                                                    |
| #45 | NSAID\$                                                                                                                    |
| #46 | #28 OR #29 OR #30 OR #31 OR #32 OR #33 OR #34 OR #35 OR #36 OR #37 OR #38 OR #39 OR #40 OR #41 OR #42 OR #43 OR #44 OR #45 |
| #47 | Folate\$                                                                                                                   |
| #48 | Folic\$                                                                                                                    |
| #49 | Folic acid                                                                                                                 |
| #50 | #47 OR #48 OR #49                                                                                                          |
| #51 | Calcium                                                                                                                    |
| #52 | Calcium\$                                                                                                                  |
| #53 | Calcium, dietary                                                                                                           |
| #54 | #51 OR #52 OR #53                                                                                                          |
| #55 | Cholecalciferol                                                                                                            |
| #56 | Cholecalciferol\$                                                                                                          |
| #57 | Ergocalciferol\$                                                                                                           |
| #58 | Ergocalciferols                                                                                                            |
| #59 | Vitamin D                                                                                                                  |
| #60 | #55 OR #56 OR #57 OR #58 OR #59                                                                                            |
| #61 | Antioxidant\$                                                                                                              |
| #62 | Anti-oxidant\$                                                                                                             |
| #63 | Antioxidants                                                                                                               |
| #64 | Ascorbic acid                                                                                                              |
| #65 | Vitamin C                                                                                                                  |
| #66 | Vitamin A                                                                                                                  |
| #67 | Beta-carotene                                                                                                              |
| #68 | Carotenoid\$                                                                                                               |
| #69 | Carotenoids                                                                                                                |
| #70 | Selenium                                                                                                                   |
| #71 | Tocopherol\$                                                                                                               |
| #72 | Tocopherols                                                                                                                |
| #73 | Tocotrienol\$                                                                                                              |
| #74 | Tocotrienols                                                                                                               |
| #75 | Alpha-tocopherol\$                                                                                                         |
| #76 | Vitamin E                                                                                                                  |
| #77 | #61 OR #62 OR #63 OR #64 OR #65 OR #66 OR #67 OR #68 OR #69 OR #70 OR #71 OR #72 OR #73 OR #74 OR #75 OR #76               |

|                                                                                                                                                                                                                                                                                                                                 |                                                                    |
|---------------------------------------------------------------------------------------------------------------------------------------------------------------------------------------------------------------------------------------------------------------------------------------------------------------------------------|--------------------------------------------------------------------|
| #78                                                                                                                                                                                                                                                                                                                             | Clinical trial                                                     |
| #79                                                                                                                                                                                                                                                                                                                             | Controlled clinical trial                                          |
| #80                                                                                                                                                                                                                                                                                                                             | Single blind method                                                |
| #81                                                                                                                                                                                                                                                                                                                             | Double blind method                                                |
| #82                                                                                                                                                                                                                                                                                                                             | Placebo                                                            |
| #83                                                                                                                                                                                                                                                                                                                             | Placebo\$                                                          |
| #84                                                                                                                                                                                                                                                                                                                             | Random\$                                                           |
| #85                                                                                                                                                                                                                                                                                                                             | Random allocation                                                  |
| #86                                                                                                                                                                                                                                                                                                                             | Randomized controlled trial                                        |
| #87                                                                                                                                                                                                                                                                                                                             | Randomized controlled trials                                       |
| #88                                                                                                                                                                                                                                                                                                                             | #78 OR #79 OR #80 OR #81 OR #82 OR #83 OR #84 OR #85 OR #86 OR #87 |
| #89                                                                                                                                                                                                                                                                                                                             | #46 OR #50 OR #54 OR #60 OR #77                                    |
| #90                                                                                                                                                                                                                                                                                                                             | #27 AND #88 AND #89                                                |
| <p>This search strategy (include search terms for both adenomas and colorectal cancer (CRC)) was developed for parent study<sup>1</sup>: a systematic review and network meta-analysis of CPAs (chemopreventive agents) for CRC, which has been registered (registration number: CRD42015025849) with PROSPERO, previously.</p> |                                                                    |

**Figure S1.1- PRISMA flow diagram for primary outcomes**

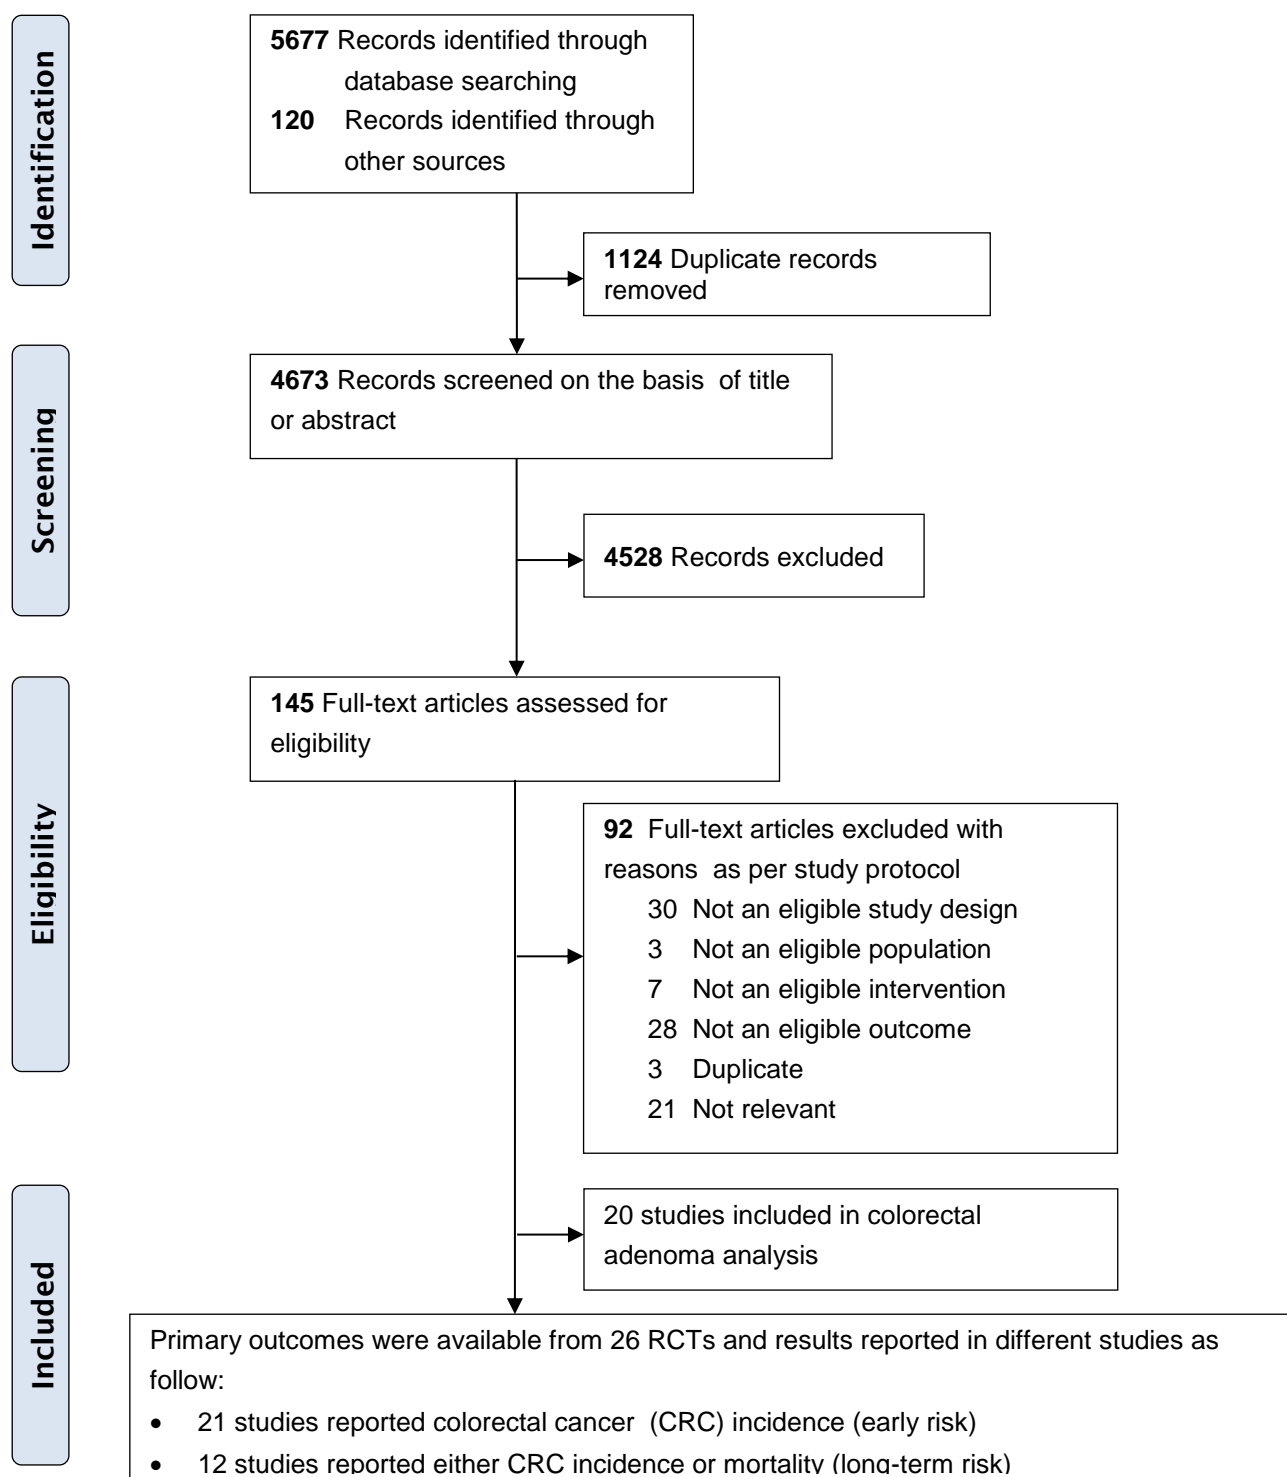

**Safety outcomes were available from additional 18 RCTs from US preventive task force review (total 25 RCTs reported safety outcomes): for more details refer Appendix 3 (eTable 3.9 and 3.10)**

\*This flow diagram represents the results based on search strategy given in Table A.1 (parent study). 20 RCTs reported the incidence of adenoma recurrence and analysed separately <sup>2</sup>.

## Supplement 2: Additional description of methods

### Primary outcomes

#### *Early risk of colorectal cancer*

Identified 21 RCTs reported early risk of CRC incidence (follow-up  $\leq 10$  years). (*refer eTable 3.1-3.3 in Appendix 3*).

#### *Long-term risk of incidence and mortality due to colorectal cancer*

12 RCTs reported either CRC incidence or mortality were included. Nine RCTs reported long-term risk of CRC incidence and 7 RCTs reported long-term risk of CRC mortality (*refer eTable 3.5-3.7 in Appendix 3*). Data on long-term risk of CRC incidence or mortality from these 12 RCTs were identified from 6 post-trial observational studies<sup>3-8</sup> and 2 IPD meta-analyses<sup>9,10</sup>.

### Reasons for exclusion of identified studies

One RCT<sup>11</sup> (Gaziano 2012- Physicians' Health Study II (PHS-II)), excluded because of following reasons: In Physicians' Health Study II, participants were randomized to one of 16 possible combinations of vitamin C (500 mg synthetic ascorbic acid), vitamin E (400 IU of synthetic alpha-tocopherol), beta-carotene (50 mg Lurotin), a multivitamin (Centrum Silver), or their placebos (2x2X2X2 factorial design). There are two reports of the same study available. The first published one was Gaziano 2009 (*Refer eTable 3.1 Appendix 3*), which reported 8-year follow-up results of PHS-II<sup>12</sup>. However, no data available for individual arms for network meta-analysis. When requested for data, authors provided data for two arms (any antioxidants including multivitamins versus placebo). The second report of PHS-II was Gaziano 2012, which is around 11.2 year (10-13 years) follow-up of the same study looking efficacy of only multivitamin versus placebo. Furthermore, no data available for individual arms in Gaziano 2012 report. Since the data from Gaziano 2009 was available from authors, we used 8-year follow-up results of PHS-II in our analysis and excluded Gaziano 2012 study.



**Table S2.1 Data available on request**

| <b>Early risk of colorectal cancer</b>                                         |                                                                                                                                                                                                                                                                                                                                                                         |
|--------------------------------------------------------------------------------|-------------------------------------------------------------------------------------------------------------------------------------------------------------------------------------------------------------------------------------------------------------------------------------------------------------------------------------------------------------------------|
| Women Health Study (WHS) <sup>13</sup>                                         | No published data available for individual arms. Authors provided data (incidence of CRC) on request for 4 arms [aspirin; vitamin E; aspirin with vitamin E; placebo]. (Refer eTable 3.1 Appendix 3)                                                                                                                                                                    |
| WACS (The Women's Antioxidant Cardiovascular Study) <sup>14,15</sup>           | No published data available for individual arms. Authors provided data (incidence of CRC) on request for 2 arms after intention to treat (ITT) analyses on request [any antioxidants ( <i>vitamin C+ vitamin E+ beta-carotene</i> ); placebo]. (Refer eTable 3.1 Appendix 3)                                                                                            |
| WAFACS (Women's Antioxidant and Folic Acid Cardiovascular Study) <sup>16</sup> | No published data available for individual arms. Authors provided data (incidence of CRC) on request for 3 arms after ITT analyses [ <i>folic acid arm; any antioxidants arm; placebo</i> ]. (Refer eTable 3.1 Appendix 3)<br>WACS and WAFACS assumed as different trials. Refer <i>section 1f. Description of data collection from some studies (for more details)</i> |
| Physicians' Health Study II <sup>12</sup>                                      | No published data available for individual arms. Authors provided data (incidence of CRC/deaths due to CRC) on request for 2 arms [ <i>any antioxidants; placebo</i> ]. ((Refer eTable 3.1 Appendix 3)                                                                                                                                                                  |

**Methods S2.1 Strategies of data synthesis and statistical analysis**

|                                                                                                                                                                                                                                                                                                                                                                                                                                                                                                                                                                                                                                                                                         |                                                                                                                                                                                                                                                                                                                                                                                                                                                                                              |
|-----------------------------------------------------------------------------------------------------------------------------------------------------------------------------------------------------------------------------------------------------------------------------------------------------------------------------------------------------------------------------------------------------------------------------------------------------------------------------------------------------------------------------------------------------------------------------------------------------------------------------------------------------------------------------------------|----------------------------------------------------------------------------------------------------------------------------------------------------------------------------------------------------------------------------------------------------------------------------------------------------------------------------------------------------------------------------------------------------------------------------------------------------------------------------------------------|
| <b>Definition of primary outcomes:</b><br>Primary efficacy outcomes of interest were incidence and mortality due to CRC. We present primary efficacy outcomes stratified by follow-up period after initiation of CPA as early risk (0-10 years) and long-term risk (0 to ≥20 years)                                                                                                                                                                                                                                                                                                                                                                                                     |                                                                                                                                                                                                                                                                                                                                                                                                                                                                                              |
| <b>Definition of safety outcomes:</b><br>Safety outcomes of interest were major gastrointestinal (GI) bleeding events, defined as events requiring hospitalization, transfusion, leading to death, or defined as fatal or major by the study investigators and cardiovascular (CV) mortality, defined as deaths due to any CV complications including myocardial infarction (MI), stroke (ischemic and haemorrhagic) or defined as CV deaths (excluding deaths due to GI events) by the study investigators.<br>Description of search strategy and data synthesis for safety outcomes is provided in <a href="#">eTables 3.9-3.10</a> and <a href="#">eFigure 3.1 in Supplement 3</a> . |                                                                                                                                                                                                                                                                                                                                                                                                                                                                                              |
| 1                                                                                                                                                                                                                                                                                                                                                                                                                                                                                                                                                                                                                                                                                       | Early risk: incidence from intervention phase with a follow-up of 0 to 10 years<br>Long-term risk: incidence from both intervention and post-trial phase with a follow-up of 0 to ≥20 years                                                                                                                                                                                                                                                                                                  |
| 2                                                                                                                                                                                                                                                                                                                                                                                                                                                                                                                                                                                                                                                                                       | The development of CRC takes place slowly and the full effect of any preventive measure will only be seen in the longer terms (especially CRC mortality). <sup>17</sup> Hence, for long-term risk of CRC incidence and mortality, we stratified studies by follow-up period after initiation of CPA. For primary analysis, we focused studies with follow-up ≥10 years to capture precise long-term effect. In sensitivity analysis, we included all studies with follow-up 0 to ≥ 20 years. |
| 3                                                                                                                                                                                                                                                                                                                                                                                                                                                                                                                                                                                                                                                                                       | We followed the intention to treat principle by using the initial number of randomized participants to each trial arm and performed the analyses irrespective of how the authors of the original trials had analysed the data. Participants who were lost to follow-up were considered survivors, free of CRC or adverse events.                                                                                                                                                             |
| 4                                                                                                                                                                                                                                                                                                                                                                                                                                                                                                                                                                                                                                                                                       | We excluded randomized groups that included other interventions (those not defined as CPA/intervention as per our protocol)                                                                                                                                                                                                                                                                                                                                                                  |
| 5                                                                                                                                                                                                                                                                                                                                                                                                                                                                                                                                                                                                                                                                                       | If there is no separate/complete report of results (events) from each arm of a factorial trial, our results were based on 'at-margins' analysis, comparing all groups that received intervention with groups that did not receive intervention <sup>18</sup> .                                                                                                                                                                                                                               |
| 6                                                                                                                                                                                                                                                                                                                                                                                                                                                                                                                                                                                                                                                                                       | If multiple publications or data of the same trial were retrieved, only the most recent, informative or relevant data were included from these publications.                                                                                                                                                                                                                                                                                                                                 |
| 7                                                                                                                                                                                                                                                                                                                                                                                                                                                                                                                                                                                                                                                                                       | If the same trial (e.g. 2 X 2 factorial with 4 arms (A, B, A+B, Placebo)) reporting the effect of interventions in different publications (e.g. Article-1 reports: A and A+B versus B and Placebo; Article-2 reports: B and A+B versus A and Placebo), we used the results from one publication at a time in our network meta-analysis (because both publications reported results of same population). We used the report of the most relevant                                              |

|    |                                                                                                                                                                                                                                                                                                                                                                                                                                                                                                                                                                                                                                                                                                                                                                                                                                                                                                                                                                                                                                                                                                                                                                                                                                                                                                                                                                                                                                                                                                                                                                                                                                                                                                                                                                                                                                                                                                                                                                                                                                                                                                                                                                                                                                                                                                                                           |
|----|-------------------------------------------------------------------------------------------------------------------------------------------------------------------------------------------------------------------------------------------------------------------------------------------------------------------------------------------------------------------------------------------------------------------------------------------------------------------------------------------------------------------------------------------------------------------------------------------------------------------------------------------------------------------------------------------------------------------------------------------------------------------------------------------------------------------------------------------------------------------------------------------------------------------------------------------------------------------------------------------------------------------------------------------------------------------------------------------------------------------------------------------------------------------------------------------------------------------------------------------------------------------------------------------------------------------------------------------------------------------------------------------------------------------------------------------------------------------------------------------------------------------------------------------------------------------------------------------------------------------------------------------------------------------------------------------------------------------------------------------------------------------------------------------------------------------------------------------------------------------------------------------------------------------------------------------------------------------------------------------------------------------------------------------------------------------------------------------------------------------------------------------------------------------------------------------------------------------------------------------------------------------------------------------------------------------------------------------|
|    | intervention in the first place (main analysis) and later replaced with the report of the other intervention in the sensitivity analysis.                                                                                                                                                                                                                                                                                                                                                                                                                                                                                                                                                                                                                                                                                                                                                                                                                                                                                                                                                                                                                                                                                                                                                                                                                                                                                                                                                                                                                                                                                                                                                                                                                                                                                                                                                                                                                                                                                                                                                                                                                                                                                                                                                                                                 |
| 8  | We classified aspirin into three groups for the analysis of long-term risk of CRC incidence and mortality as described by the latest review for the United States Preventive Services Task Force (USPSTF) <sup>19</sup> : high-dose, HDASA (>325 mg/day), low-dose, LDASA (≤325 mg/day) and very-low-dose, VLDASA (≤100 mg/day) aspirin.                                                                                                                                                                                                                                                                                                                                                                                                                                                                                                                                                                                                                                                                                                                                                                                                                                                                                                                                                                                                                                                                                                                                                                                                                                                                                                                                                                                                                                                                                                                                                                                                                                                                                                                                                                                                                                                                                                                                                                                                  |
| 9  | We defined alternate-day dose of aspirin as follows: we followed the method used by the recent systematic review by USPTF <sup>19,20</sup> ; 100 mg every other day is defined as ASA-VLD; and 325 mg every other day defined as ASA-LD.                                                                                                                                                                                                                                                                                                                                                                                                                                                                                                                                                                                                                                                                                                                                                                                                                                                                                                                                                                                                                                                                                                                                                                                                                                                                                                                                                                                                                                                                                                                                                                                                                                                                                                                                                                                                                                                                                                                                                                                                                                                                                                  |
| 10 | Strategy of data extraction/synthesis for safety outcomes is provided in eTable 3.9                                                                                                                                                                                                                                                                                                                                                                                                                                                                                                                                                                                                                                                                                                                                                                                                                                                                                                                                                                                                                                                                                                                                                                                                                                                                                                                                                                                                                                                                                                                                                                                                                                                                                                                                                                                                                                                                                                                                                                                                                                                                                                                                                                                                                                                       |
| 11 | <p><b>Statistical analysis:</b></p> <p>The outcome measure was the risk ratio (RR), which is the ratio between the incidence of CRC (or CRC mortality or adverse events) in the intervention arm and that in the placebo or control arm along with a 95% confidence interval (CI). A RR below 1 indicated that the treatment was associated with a lower risk of the outcome (CRC incidence and mortality and adverse effects) than the comparator while a RR above 1 indicated that the treatment was associated with a greater risks of the outcome than the comparator. For direct comparisons, a standard pairwise meta-analysis was performed by using a random-effects model. If a direct comparison was based on two or more studies, heterogeneity between trials was assessed by considering the I<sup>2</sup> statistics; an I<sup>2</sup> estimate ≥50% was interpreted as evidence of substantial levels of heterogeneity. A random-effects network meta-analysis using either a consistency or an inconsistency model was applied to synthesize the available evidence by combining direct and indirect evidence from different studies. Network inconsistency assumption, which refers to a disagreement between the direct and indirect estimates, was evaluated using a global inconsistency test by fitting design-by-treatment in the inconsistency model. In addition to the indirect comparisons, we also estimated the probability of each treatment being the best (lowest rate of CRC, mortality due to CRC or cardiovascular (CV) mortality) and safest (lowest rate of major gastrointestinal (GI) bleeding events) and constructed rankograms (relative ranking of CPAs) and their surface area under the cumulative ranking (SUCRA). Higher SUCRA scores (ranging from 0 to 1) correspond to higher ranking for prevention of CRC incidence and mortality and lower SUCRA scores correspond to higher ranking for safety in terms of CV mortality and GI bleeding events, compared with other CPAs. Publication bias was examined with a comparison-adjusted funnel plot.</p> <p>The systematic review was performed and reported according to the Preferred Reporting Items for Systematic Reviews and Meta-Analyses (PRISMA) statement incorporating network meta-analyses of health care Interventions.</p> |
| 12 | <p><b>Differences between protocol and final review:</b></p> <p>The following changes to the review were made before data analyses were done:</p> <ul style="list-style-type: none"> <li>• Search was extended to September 2015 to March 2017</li> <li>• We stratified studies by follow-up period after initiation of CPA</li> <li>• We classified aspirin into three groups for the analysis of long-term risk of CRC as described by the latest review for the USPSTF: high-dose or HDASA (&gt;325 mg/day), low-dose or LDASA (&gt;100 and ≤325 mg/day) and very-low-dose or VLDASA (≤100 mg/day) aspirin.</li> </ul> <p>The following changes to the review were made after data analyses were done:</p> <ul style="list-style-type: none"> <li>• We decided to abstract data on safety outcomes (such as CV mortality and major GI bleeding events) for those interventions with evidence of efficacy (that is, aspirin)</li> <li>• Additional sensitivity analyses were conducted as described in eTable 2.4</li> <li>• We also performed net clinical benefit analysis of aspirin at different doses</li> </ul>                                                                                                                                                                                                                                                                                                                                                                                                                                                                                                                                                                                                                                                                                                                                                                                                                                                                                                                                                                                                                                                                                                                                                                                                                   |
| 13 | <p><b>Description of GRADE</b></p> <p>The Grading of Recommendations, Assessment, Development and Evaluation (GRADE) approach adapted to network meta-analysis was used to rate the quality of evidence into four levels<sup>21</sup>: high, moderate, low and very low quality. In this approach, direct estimates from RCTs rated at high quality and can be graded down to moderate, low and very-low quality based on risk of bias, indirectness, imprecision, inconsistency and publication bias. The rating of the quality of the indirect estimates starts at the lowest rating of the two direct estimates that contribute to the indirect estimate of the comparison of interest as first order loops. In the presence of intransitivity, indirect estimate can be further rate down from the lower of the confidence ratings of the contributing direct comparisons. Finally, if both direct and indirect evidence are available then the higher of the two quality ratings can be assigned to the quality rating for NMA estimates.</p>                                                                                                                                                                                                                                                                                                                                                                                                                                                                                                                                                                                                                                                                                                                                                                                                                                                                                                                                                                                                                                                                                                                                                                                                                                                                                        |

**Table S2.2 Description of data collection and analysis for studies comes under sections 6 and 7 of Table 2.2**

| Early risk of colorectal cancer |                                                                                                                                                                                                                                                                                                                                                                                                                                                                                                                                                                                                                                                                                                                                                                                                                                                                                                                                                                                                                                                                                                                                                                                                                                                                                                                                                                                                                                                                                                                                                                                                                                                                                                                                                                       |
|---------------------------------|-----------------------------------------------------------------------------------------------------------------------------------------------------------------------------------------------------------------------------------------------------------------------------------------------------------------------------------------------------------------------------------------------------------------------------------------------------------------------------------------------------------------------------------------------------------------------------------------------------------------------------------------------------------------------------------------------------------------------------------------------------------------------------------------------------------------------------------------------------------------------------------------------------------------------------------------------------------------------------------------------------------------------------------------------------------------------------------------------------------------------------------------------------------------------------------------------------------------------------------------------------------------------------------------------------------------------------------------------------------------------------------------------------------------------------------------------------------------------------------------------------------------------------------------------------------------------------------------------------------------------------------------------------------------------------------------------------------------------------------------------------------------------|
| 1                               | <p><b>Physicians' Health Study (PHS)-I:</b> This landmark study was begun in the fall of 1982 to test the benefits and risks of aspirin and beta carotene in the primary prevention of cardiovascular disease and cancer. It employed 2X2 factorial design and assigned participants to get one of four possible combinations: active aspirin and active beta-carotene, active aspirin and beta-carotene placebo, aspirin placebo and active beta-carotene, or aspirin placebo and beta-carotene placebo. Aspirin component terminated early after 5 years (participants could then take open label aspirin) and beta-carotene component continued up to 12 years. There were two publications reported based on PHS-I on cancer outcomes (Gann 1993<sup>22</sup> and Hennekens 1996<sup>23</sup>). Gann 1993<sup>22</sup> reported 5-year results of aspirin and Hennekens 1996<sup>23</sup> reported results of beta-carotene. However, no data/results available for individual arms in this factorial trial. We did not use the data from these two papers together in our analysis. We used aspirin data (5 years) (will be considered as study with high risk of bias-see eTable 3.4) for our main analysis. Beta-carotene data tested in sensitivity analysis (trials with low risk of bias) by excluding aspirin data. We communicated with the PHS study group for getting individual arms data; however, data were not available on request. <b>Author's reply:</b> Author's not recommended utilizing the Gann paper (report of aspirin arm) as the sole data source for PHS I – it was not analysed as a RCT in the way other main PHS analyses were typically conducted. Hence we considered data from Gann's paper as study with high risk of bias.</p> |
| 2                               | <p><b>Heart Outcomes Prevention Evaluation trial (HOPE):</b> HOPE study<sup>24</sup> was designed (2X2 factorial design) to test the hypotheses that two preventive intervention strategies, namely angiotensin-converting enzyme (ACE) inhibition or vitamin E, would improve morbidity and mortality in patients at high risk of cardiovascular events compared with placebo<sup>24</sup>. HOPE also reported whether long-term supplementation with vitamin E or folic acid (later added into trial) decreases the risk of cancer, cancer death.</p> <p>There were 2 publications related to HOPE based on cancer with intervention vitamin E and folic acid:</p> <ul style="list-style-type: none"> <li>• Lonn 2005 (HOPE/HOPE-TOO)<sup>25</sup> reported effect of vitamin E using all HOPE participants (Primary analysis; N = 9541; follow-up 4.5 years) and results of extension trial (N=7030; follow-up 7 years). In our analysis we used results from all HOPE participants (primary analysis; follow-up 4.5 years).</li> <li>• Lonn 2006 (HOPE 2)<sup>26</sup>: HOPE-2 is a subset of HOPE/HOPE-TOO trial (n=5522). Folic acid component added during the follow-up (5 years) as a part of HOPE-2 investigation (looking the effect on cardiovascular events and cancer).</li> </ul> <p>Lonn 2005<sup>25</sup> and Lonn 2006<sup>26</sup> reported the results of vitamin E and folic acid components, respectively. No data for separate arms reported. For our primary network meta-analysis analysis, we used data from Lonn 2006 (the latest report of HOPE study). In sensitivity analysis, we replaced HOPE-2 participants with HOPE/HOPE-TOO (Lonn 2005).</p>                                                                                      |
| 3                               | <p><b>Women's Health Study (WHS)</b><sup>13,27</sup>: WHS was designed as a randomized trial (2X2 factorial design) of low-dose aspirin (ASA) and vitamin E (VE) supplementation for the primary prevention of cardiovascular disease and cancer in healthy women with a follow-up around 10 years. No data/results available for individual arms in this factorial trial (ASA; VE; ASA+VE; Placebo). However, we were able to successfully obtained unpublished data for factorial arms from study authors. We used this data for network meta-analysis. But, long-term data of WHS<sup>6</sup> for individual arms were not available. Hence we used the principle of 'at-margins' analysis, i.e. aspirin versus no-aspirin for the analysis of long-term risk of CRC incidence.</p>                                                                                                                                                                                                                                                                                                                                                                                                                                                                                                                                                                                                                                                                                                                                                                                                                                                                                                                                                                                |
| 4                               | <p><b>The Women's Antioxidant Cardiovascular Study (WACS)/ Women's Antioxidant and Folic Acid Cardiovascular Study (WAFACS):</b> WACS<sup>14,15</sup> is a randomized, double-blind, placebo-controlled trial (Cook 2007/Lin 2009). It employed 2X2X2 factorial design and participants were assigned to several antioxidants—vitamin E, vitamin C, beta-carotene. Approximately 2 to 3 years following randomization to the antioxidant arms, a folic acid–vitamin B6/B12 component was added to the trial called WAFACS study<sup>16</sup>; a subset of WACS. For our analysis of WACS, we categorized interventions into (provided by author): any antioxidants (vitamin C 500 mg/day + vitamin E 600 IU EOD + beta-carotene 50 mg EOD) (n=7149) and placebo (n= 1022) [WACS period prior to WAFACS, randomized only to antioxidants (June 1995- October 1996 through April 15, 1998)].</p> <p>WAFACS (Zhang 2008<sup>16</sup>) is considered as 4-arm factorial design trial. The WAFACS population was first only in WACS and then randomized to folic acid and vitamins B on April 16, 1998. For our analysis of WAFACS, we</p>                                                                                                                                                                                                                                                                                                                                                                                                                                                                                                                                                                                                                                 |

|                                            |                                                                                                                                                                                                                                                                                                                                                                                                                                                                                                                                                                                                                                                                                                                                                                                                                                                                                                                                                                                                                                                                                                                                                                                                                                                                                                                                                                                                                                                         |
|--------------------------------------------|---------------------------------------------------------------------------------------------------------------------------------------------------------------------------------------------------------------------------------------------------------------------------------------------------------------------------------------------------------------------------------------------------------------------------------------------------------------------------------------------------------------------------------------------------------------------------------------------------------------------------------------------------------------------------------------------------------------------------------------------------------------------------------------------------------------------------------------------------------------------------------------------------------------------------------------------------------------------------------------------------------------------------------------------------------------------------------------------------------------------------------------------------------------------------------------------------------------------------------------------------------------------------------------------------------------------------------------------------------------------------------------------------------------------------------------------------------|
|                                            | <p>categorized interventions into (provided by author): Folic acid with vitamins B alone (Folic acid 2.5 mg/day + vitamin B12 1 mg/day + vitamin B6 50 mg/day) (n=342); antioxidants alone (vitamin C 500 mg/day + vitamin E 600 IU EOD + beta-carotene 50 mg EOD) (n= 2376); folic acid with vitamins B + antioxidants (n = 2379) and placebo alone (n= 345) [Follow-up: April 16, 1998 - July 31, 2005 ].</p> <p>Authors provided data of WACS period (randomized only to antioxidants) prior to WAFACS (June 1995-October 1996 through April 15, 1998 – mean duration 2.2 years). Among 8171 participants of WACS, 2729 participants were not agreed to participate in WAFACS (April 1998). Follow-up data of these participants were also provided (duration ≈ 8 years) by authors. We used the follow-up data from these 2729 participants (considered as WACS participants) not participated in WAFACS for our NMA. Due to the high attrition rate, analysis considered with caveats. Remaining 5442 participants from WACS additionally willing to forgo the use of folic acid with vitamins B (randomization starts from April 1998-WAFACS). We consider it as a different trial (WAFACS) starting from April 1998. We used 4-arm data of WAFACS provided by author (status till July 31, 2005) for analysis (mean follow-up was ≈ 7.3 years for all interventions). For both studies, authors provided data after ITT analyses on request.</p> |
| 5                                          | <p><b>Physicians' Health Study II</b><sup>12</sup> : Participants were assigned to one of 16 possible combinations of vitamin C (500 mg/day), vitamin E (400 IU EOD), beta-carotene (terminated early), a multivitamin, or their placebos. For our analysis, we categorized interventions into (provided by author): Any anti-oxidants (including multivitamins) (n=13619); Placebo alone (n=901). Participants with prior cancer event at baseline were excluded.</p>                                                                                                                                                                                                                                                                                                                                                                                                                                                                                                                                                                                                                                                                                                                                                                                                                                                                                                                                                                                  |
| <b>Long-term risk of colorectal cancer</b> |                                                                                                                                                                                                                                                                                                                                                                                                                                                                                                                                                                                                                                                                                                                                                                                                                                                                                                                                                                                                                                                                                                                                                                                                                                                                                                                                                                                                                                                         |
| 1                                          | <p><b>Norwegian Vitamin Trial (NORVIT) and Western Norway B Vitamin Intervention Trial (WENBIT) follow-up:</b> Ebbing 2009<sup>5</sup> reported combined analysis of extended follow-up of participants from 2 RCTs (randomized double-blind): NORVIT<sup>28</sup> and WENBIT<sup>29</sup> trials, which evaluated the effects of folic acid treatment with B vitamins on cancer outcomes for a duration of 3.2 years. Ebbing reported extended observational follow-up of these 2 trials (combined analysis) for duration of 6.4 years. Since this study considered outcomes from both intervention and post-trial phase as seen in other studies included in long-term evaluation (not “early risk” which considered outcomes from only intervention phase), we included this study in the analysis of long-term incidence of CRC (follow-up period after initiation of CPA 0 to ≥20 years).</p> <p>We did not include the data from these two trials in our primary analysis for long-term CRC incidence, which considered a follow-up period after initiation of CPA with ≥ 10 years.</p>                                                                                                                                                                                                                                                                                                                                                           |
| 2                                          | <p><b>Physician health study (PHS) follow-up:</b> Participants were assigned to aspirin 325 mg EOD and beta-carotene 50 mg EOD in 2X2 factorial design. The aspirin arm of the study was terminated early (after 5 years). Sturmer 1998<sup>8</sup> reported long-term follow-up results of aspirin arm (12 years); we used this report for long-term analysis.</p>                                                                                                                                                                                                                                                                                                                                                                                                                                                                                                                                                                                                                                                                                                                                                                                                                                                                                                                                                                                                                                                                                     |

**Table S2.3 Assumptions of sensitivity analyses for network meta-analyses**

|                                                                                                      |                                                                                                                                                                                                                      |
|------------------------------------------------------------------------------------------------------|----------------------------------------------------------------------------------------------------------------------------------------------------------------------------------------------------------------------|
| <b>Early risk of colorectal cancer</b>                                                               |                                                                                                                                                                                                                      |
| 1                                                                                                    | Exclusion of studies with high risk of bias                                                                                                                                                                          |
| 2                                                                                                    | Consider folic acid (FA) ± other CPAs as single intervention called Folic acid (instead of considering FA alone, FA+B12, FA+B6+B12 etc.) – in order to confirm the effect of folic acid                              |
| 3                                                                                                    | PHS aspirin data replaced with PHS antioxidants data as discussed above (because of high ROB)                                                                                                                        |
| 4                                                                                                    | Modifying HOPE study data from HOPE-2 (Lonn 2006) participants (Folic acid + vitamin B6 + vitamin B12 vs. placebo) with data from HOPE/HOPE-TOO (Lonn 2005) participants (vitamin E vs. placebo) as discussed above. |
| <b>Long-term risk of colorectal cancer- Primary analysis: RCTs with follow-up more than 10 years</b> |                                                                                                                                                                                                                      |
| Long-term incidence                                                                                  |                                                                                                                                                                                                                      |
| 1                                                                                                    | All RCTs (follow-up 0-20 years or more)                                                                                                                                                                              |
| Long-term mortality                                                                                  |                                                                                                                                                                                                                      |
| 1                                                                                                    | All RCTs (follow-up 0-20 years or more)                                                                                                                                                                              |

## Methods S2.2 Description of Net clinical benefit analysis

The evidence base on aspirin suggests that it can reduce the risk of cardiovascular disease (CVD) events and colorectal cancer mortality over the long term<sup>19,30</sup>. On the other hand, aspirin increase the risk of major gastrointestinal (GI) bleeding and haemorrhagic stroke or other intracranial bleeding events<sup>19,20,31</sup>. To appreciate the balance of benefits from colorectal cancer mortality prevention and CV benefits with other risks, we performed net clinical benefit analysis (NBA).

In this approach, we review the estimated absolute effect of aspirin on following outcomes:

1) Long-term CRC mortality (as shown in our network meta-analysis) –See Supplement 7 for NMA results

2) CV mortality (defined as mortality due to cardiovascular (CV) events and bleeding events (haemorrhagic stroke or intracranial or other bleeding events), excluding GI bleeding events) - See Appendix 8 for NMA results

*CV mortality here may indirectly represent the overall benefits from CV outcomes (Overall CV benefits = Benefits (CV events such as MI, ischemic stroke etc.) - harms (haemorrhagic stroke or intracranial or other bleeding events except GI bleeding events) of aspirin therapy.*

3) Major GI bleeding events - See Supplement 8 for NMA results

*[Item 1 and 2 represents the benefits and item 3 represents harms from aspirin therapy]*

Net clinical benefit analysis (NBA) analysis was based on the approach used in a previous meta-analyses<sup>32,33</sup> and was calculated according to the formula,

We calculated net survival gain (a way to represent the results of NCB) by reviewed reviewing the estimated absolute effect of aspirin on long-term CRC mortality and CV mortality, and other CV events apart from GI bleeding events) and subtracted the risk of mortality due to major GI bleeding events.

*Net survival gain (%)= Difference in pooled risk estimates of CRC mortality between reference and intervention + Difference in pooled risk estimates of CV mortality between reference and intervention - Weight x difference in pooled risk estimates of major GI bleeding events between reference and intervention.*

The weighting factor was determined from the proportion of death among patients with GI bleeding. Based on several previous publications<sup>31,34–38</sup>, fatal GI bleeding event had 6% of the effect of a single mortality, therefore a weighting factor of 0.06 was used. Additional sensitivity analyses of net clinical benefit were conducted by varying weighting factors from 0.01 to 0.16. (See below)

### Description of derivation of weighting factor

According to the NCB calculation method from Chatterjee et al<sup>32</sup>, the weighting factor was derived from the previous publication<sup>39</sup>, which is basically based on the likelihood of death and serious disability due to ICH.

- Quote “At hospital discharge, 76% of patients with intracranial haemorrhage had severe disability or died.”

Similarly, weighting factor to indicate the relative effect of gastro intestinal bleed to death associated with aspirin therapy can be derived based on:

1) the previous observational study to investigate the estimate of mortality associated with major GI events with NSAIDs use was conducted in Spain by using the Spanish National Health System<sup>36</sup>. The prevalence of NSAID/aspirin use (including OTC use) in the study population was estimated to be approximately 19% (17.7% to 19.8%). The estimated rate of GI complications in patients not previously exposed to NSAIDs/aspirin was over 120 per 100,000 patients/year, while in patients previously exposed to NSAIDs/aspirin rates were substantially higher at 480/100,000 patients/year. Therefore, the proportion of complications and deaths attributed to NSAID/aspirin use was 36.3%.

- Using the data given above, the estimated number of GI complication events and deaths attributed to NSAID/aspirin use for the entire country was 15,031 and 860 (5.72%), respectively, for study 1, and 18,191 and 1,022 (5.62%), respectively, for study 2.

- When the number of complications and deaths were calculated by the type of NSAID used, low-dose aspirin was responsible for no less than 8.2% and no more than 12.2% of all complications and deaths; therefore, between 4,109 and 6,113 complications, and 231 (5.62%) and 343 (5.61%) deaths, approximately, were due to low-dose aspirin use.

2) Elwood et al.<sup>40</sup> conducted a systematic review and meta-analysis of randomised trials to estimate the frequency of fatal GI bleeds from aspirin. 11 RCT were included in the review with 9 trials were assessed as having low risk of bias. Aspirin was used at dose ranging from 100 mg alternate days to 1900 mg daily. The risk of a bleed attributable to aspirin being fatal was 0.45 (95% CI 0.25, 0.80).

- From table 1, estimated number of fatal GI bleeding that attributed to aspirin use from each of included trials was ranging from 0-14%, with an average about 7.5%.

- From table 2, the number of bleeds during on aspirin was 468 patients. Of these, 24 patients were death (5.1%).

Therefore, if we assume that the incidence of GI bleeding is constant persists throughout the duration of aspirin use, **weighting factor to demonstrate death contributed by aspirin should be 0.06.**

Variation of weighting factor for sensitivity analysis to demonstrate the different in risk of deaths attributed to aspirin can be derived based on the studies below.

- Rockall et al<sup>37</sup> demonstrated the incidence of and mortality from acute upper GI bleeding in United Kingdom. The overall incidence of acute upper gastrointestinal haemorrhage in the United Kingdom is 103/100,000 adults per year. **Overall mortality was 14%** (11% in emergency admissions and 33% in haemorrhage in inpatients).

- Straube et al<sup>38</sup> published a systematic review on mortality with UGIB attributed from NSAIDs or aspirin. 47 data sets during 1997-2008 with variation of method from case report to RCTs were included in their analysis. **The study demonstrated the overall mortality rate of UGIB or perforation among case using NSAIDs for 16.4% (15.4 to 17.3).**

- o The major limitation of this study is included studies rarely stratified mortality according to a specific diagnosis, and it was not possible to perform analyses based on diagnosis. Mortality was reported in different ways; as a simple report of death, 30-day mortality, death in hospital or at home, upper-gastrointestinal-related death, and others.

- Whitlock et al<sup>31</sup> performed systematic review on bleeding risks with aspirin use for primary prevention in adults. Using available trial and cohort data, the study found that the risk for bleeding associated with low-dose aspirin use probably persists throughout use but declines with discontinuation.

- o In the Women's Health Study, the cumulative incidence of GI bleeding did not plateau in very-low-dose aspirin users compared with placebo recipients throughout 10 years of follow-up.
- o In contrast, a time point-stratified IPD meta-analysis suggested that the risk for major extracranial bleeding seen in early years decreased after 3 years. Because bleeding risks with placebo also declined with time, however, another mechanism for reduced bleeding events (such as unequal observation time) could have driven this observation.
- o Two cohort studies found that bleeding risk in regular aspirin users did not vary by duration of use (<5 years or ≥5 years).
- o Weak evidence from the Women's Health Study suggested that excess GI bleeding risk rapidly attenuates after stopping aspirin.

- The U.S. Preventive Services Task Force (USPSTF)<sup>34,35</sup> initiated the decision analysis to assess the net balance of benefits and harms from routine aspirin use. Case-fatality rates for GI bleeding, based on patients without complicating comorbidities, were derived from a prospective study conducted in the United Kingdom. **The probability of dying from GI bleeding was increase from 1% for age 40-59 years to 19% for age more than 80 years.**

**Based on above data, if we assume that the incidence of GI bleeding is constant persists throughout the duration of aspirin use, weighting factor to demonstrate death contributed by aspirin should be 0.06 (vary from 0.01-0.16).**

**Statistical analysis:** Pooled risk estimate of the treatment with reference was calculated by using meta-analyses of proportions (calculated by using meta-analyses of proportions in Stata with metaprop command)<sup>41</sup>. To obtain the 95% confidence intervals of NBA, we performed 1000 bootstrap samples of risk estimates for each intervention to calculate the risk differences among group receiving placebo and various doses of aspirin<sup>42,43</sup>.

### Supplement 3: Characteristics and risk of bias assessment of included studies

**Table S3.1 - Characteristics of RCTs reported early risk of CRC incidence**

| Author year, (reference)                         | Study name                                                 | Location       | Design                                                                   | Interventions (n=number of subjects randomized)                                                                                              | Primary outcome                                                              | Secondary outcomes                                        | Treatment duration (mean/median)                                                                                                                    | Adherence – strategies and study compliance                                                                                                                                      |
|--------------------------------------------------|------------------------------------------------------------|----------------|--------------------------------------------------------------------------|----------------------------------------------------------------------------------------------------------------------------------------------|------------------------------------------------------------------------------|-----------------------------------------------------------|-----------------------------------------------------------------------------------------------------------------------------------------------------|----------------------------------------------------------------------------------------------------------------------------------------------------------------------------------|
| Gann 1993/<br>Hennekens<br>1996 <sup>22,23</sup> | Physicians' Health Study (PHS)                             | USA            | Randomized, double-blind, placebo-controlled trial; 2x2 factorial design | Aspirin 325 mg EOD and beta-carotene 50 mg EOD (n=5,517); Aspirin 325 mg EOD (n=5,520); Beta-carotene 50 mg EOD (n=5,519); Placebo (n=5,515) | MI and other CV events (aspirin component); cancer (beta-carotene component) | Mortality due to cancer and/or CV events; adverse effects | 5 years for aspirin; 12 years for beta-carotene (aspirin component terminated early; after 5 years participants could then take open label aspirin) | ≈ 4 mo. run-in; questionnaire; blood samples; >80% adherence reported                                                                                                            |
| Peto 1988 <sup>9,10,44</sup>                     | British doctor aspirin trial (BDA) follow-up               | UK             | Open control; ; parallel                                                 | Aspirin 300 or 500 mg/day (not analysed separately) (n = 3429); Open control (n = 1710)                                                      | CV events                                                                    | Mortality from CV causes                                  | 6 years [at least 5 years for all patients] (follow-up to 9)                                                                                        | Questionnaire; 81% were compliant after 1 year but that a further 5% discontinued study aspirin during each of the next 5 years, mainly as a result of gastrointestinal symptoms |
| Farrell 1991 <sup>9,10,45</sup>                  | United Kingdom transient ischaemic attack (UK-TIA) aspirin | UK and Ireland | Randomized, double-blind, placebo-controlled trial; 2x2 factorial design | Aspirin 300 or 1200 mg/day (not analysed separately) (n = 1632); Placebo (n = 817)                                                           | CV events                                                                    | Mortality from vascular and non-vascular causes           | 4.4 years [1-7 years] (Follow-up up to 9)                                                                                                           | By interview and urine sample; about 12% of patients stopped trial medication before the 4-month                                                                                 |



| Author year, (reference)               | Study name                                    | Location | Design                                                                   | Interventions (n=number of subjects randomized)                                                                                                                                                                           | Primary outcome                                              | Secondary outcomes                          | Treatment duration (mean/median)                       | Adherence – strategies and study compliance                                                                                                          |
|----------------------------------------|-----------------------------------------------|----------|--------------------------------------------------------------------------|---------------------------------------------------------------------------------------------------------------------------------------------------------------------------------------------------------------------------|--------------------------------------------------------------|---------------------------------------------|--------------------------------------------------------|------------------------------------------------------------------------------------------------------------------------------------------------------|
|                                        | trial follow-up                               |          |                                                                          |                                                                                                                                                                                                                           |                                                              |                                             |                                                        | follow-up (although some restarted later), and 12% of patients randomised to placebo started taking non-trial aspirin at some stage during the trial |
| Omenn 1996 <sup>46,47</sup>            | Carotene and Retinol Efficacy Trial (CARET)   | USA      | Randomized, double-blind, placebo-controlled trial; parallel             | Vitamin A 25,000 IU/day + beta-carotene 30 mg/day (n = 9420); Placebo (n = 8894)                                                                                                                                          | Lung cancer                                                  | Other cancers; CV events; overall mortality | 4 years                                                | No run-in period; Questionnaire; pills count; 88% of the participants took over 90% of the prescribed capsules                                       |
| HPS group 2002 <sup>48</sup>           | Heart Protection Study (HPS)                  | UK       | Randomized, double-blind, placebo-controlled trial; 2x2 factorial design | Vitamin C 250 mg/day + vitamin E 600 mg/day + beta-carotene 20 mg/day (n = 10,269); Placebo (n= 10, 267) [approximately 50% of participants in both intervention and placebo groups also received simvastatin, 40 mg/day] | Major coronary events and fatal or non-fatal vascular events | Cancers and of other major morbidity        | 5 years                                                | ≈ 1-2 mo. run-in; pills count; blood assays; >80% adherence reported                                                                                 |
| Duffield-Lillico 2002 <sup>49,50</sup> | Nutritional Prevention of Cancer trial (NPCT) | USA      | Randomized, double-blind, placebo-controlled trial; parallel             | Selenium 200 microgram/day (n=653); Placebo (n=659)                                                                                                                                                                       | Recurrence of non-melanoma skin cancer                       | Other cancers, and overall mortality        | 4.5 years (treatment duration); 7.4 years (follow-up). | No run-in period; follow-up visit and enquiry; selenium assay; 79.3% of participants missed taking a pill less than twice a month                    |
| Albanes 2000/Virtamo                   | Alpha-Tocopherol, Beta-                       | Finland  | Randomized, double-blind, placebo-controlled trial; 2x2                  | Vitamin E 50 mg/day (n=7286); Beta-carotene 20 mg/day (n=7282); Vitamin E 50 mg/day + Beta-                                                                                                                               | Lung cancer                                                  | Other cancers, and overall mortality        | 6.1 years                                              | No run-in period; pills count; blood assays; participants                                                                                            |

| Author year, (reference)       | Study name                                                           | Location     | Design                                                           | Interventions (n=number of subjects randomized)                                                                                                                                                                                                                                                                                                                     | Primary outcome      | Secondary outcomes                              | Treatment duration (mean/median)                  | Adherence – strategies and study compliance                                                                                              |
|--------------------------------|----------------------------------------------------------------------|--------------|------------------------------------------------------------------|---------------------------------------------------------------------------------------------------------------------------------------------------------------------------------------------------------------------------------------------------------------------------------------------------------------------------------------------------------------------|----------------------|-------------------------------------------------|---------------------------------------------------|------------------------------------------------------------------------------------------------------------------------------------------|
| 2003 <sup>3,51,52</sup>        | Carotene Cancer Prevention (ATBC) Study                              |              | factorial design                                                 | carotene 20 mg/day (n=7278);<br>Placebo (n= 7287)                                                                                                                                                                                                                                                                                                                   |                      |                                                 |                                                   | took over 95% of their capsules                                                                                                          |
| Trivedi 2003 <sup>53</sup>     | NA                                                                   | UK           | Randomized, double-blind, placebo-controlled trial; parallel     | Vitamin D3 100 000 IU every four months (n= 1345);<br>Placebo (n= 1341)                                                                                                                                                                                                                                                                                             | Fracture incidence   | Cancers, CV events and total mortality by cause | 5 years                                           | No run-in period; send form by freepost (intake of capsule); 76% of participants had at least 80% compliance                             |
| Zhu 2003 <sup>54</sup>         | NA                                                                   | China        | Randomized, double-blind, placebo-controlled trial; 4 arms trial | Folic acid, 20 mg/day + vitamin-B12 1 mg, intramuscularly, per month for one year, then 20 mg two times a week plus 1 mg per three months for the next year (n=44);<br>Beta-carotene (natural), 30 mg/day for 1 year then 30 mg twice/week for 1 year) (n = 61);<br>Beta-carotene (synthetic), administered as in natural beta-carotene (n = 57);<br>Placebo (n=54) | Stomach cancer       | Other gastro-intestinal cancer                  | 2 years (treatment duration); 6 years (follow-up) | No run-in period; pills count; blood assays; adherence ≥ 90% reported                                                                    |
| Hercberg 2004 <sup>55,56</sup> | Supplémentation Vitamines et Minéraux Antioxydants study (SU.VI.MAX) | France       | Randomized, double-blind, placebo-controlled trial; parallel     | Vitamin C 120 mg/day + vitamin E 30 mg/day + beta-carotene 96 mg/day + selenium 100 microgram/day + zinc 20 mg/day (n = 6481);<br>Placebo (n=6536)                                                                                                                                                                                                                  | CV events and cancer | All-cause mortality                             | 7.5 years                                         | No run-in period; monthly questionnaire; blood assays; 74% of the participants reported having taken at least two thirds of the capsules |
| Lonn 2005 <sup>25,57</sup>     | Heart Outcomes                                                       | Canada, USA, | Randomized, double-blind, placebo-                               | Vitamin E 400 IU/day (n = 4761);<br>Placebo (n=4780)                                                                                                                                                                                                                                                                                                                | Cancer incidence,    | Heart failure, unstable angina,                 | 4.5 years (primary                                | No run-in period; pills count; blood                                                                                                     |

| Author year, (reference)            | Study name                                                                          | Location                            | Design                                                                                                                                | Interventions (n=number of subjects randomized)                                                                                                                                                                                                                     | Primary outcome                                                                  | Secondary outcomes                                                                    | Treatment duration (mean/median)                            | Adherence – strategies and study compliance                                                                                                                                                   |
|-------------------------------------|-------------------------------------------------------------------------------------|-------------------------------------|---------------------------------------------------------------------------------------------------------------------------------------|---------------------------------------------------------------------------------------------------------------------------------------------------------------------------------------------------------------------------------------------------------------------|----------------------------------------------------------------------------------|---------------------------------------------------------------------------------------|-------------------------------------------------------------|-----------------------------------------------------------------------------------------------------------------------------------------------------------------------------------------------|
| Lonn 2006 <sup>24,26</sup>          | Prevention Evaluation trial (HOPE)/ Heart Outcomes Prevention Evaluation-2 (HOPE-2) | Brazil, Slovakia and Western Europe | controlled trial; 2x2 factorial design; We used results from all HOPE participants, not HOPE–The Ongoing Outcomes [HOPE-TOO] results. | [factorial trial; approximately 50% of participants in both vitamin E and placebo groups also received ramipril, 10 mg/day; later added folic acid component as a part of HOPE-2]                                                                                   | cancer deaths, and major CV events                                               | and revascularizations                                                                | analysis duration); 7 years (extension phase)-HOPE/HOPE TOO | assay; compliance around 90% reported                                                                                                                                                         |
|                                     |                                                                                     |                                     |                                                                                                                                       | Folic acid 2.5 mg/day + vitamin B6 50 mg/day + vitamin B12 1 mg/day (n=2758); placebo (n= 2764) [some participants also received vitamin E; subset of HOPE/HOPE-TOO trial]                                                                                          | Composite of death from cardiovascular causes, myocardial infarction, and stroke | Ischemic events, death from any cause, the incidence of cancer, and death from cancer | 5 years - HOPE-2                                            | No run-in period; by interview and pill count; plasma levels of folate; compliance around 90% reported                                                                                        |
| Cook 2005/Lee 2005 <sup>13,27</sup> | Women's Health Study (WHS)                                                          | USA                                 | Randomized, double-blind, placebo-controlled trial; 2x2 factorial design                                                              | Vitamin E 600 IU EOD and aspirin 100 mg EOD (n=9,966); Vitamin E 600 IU EOD (n=9,971); Aspirin 100 mg EOD (n=9,968); Placebo (n=9,971) [The trial initially contained a beta-carotene component (50mg EOD for 2 years); stopped early due to lack of effectiveness] | Cancer or CV events                                                              | Breast, colorectal, and lung cancer                                                   | 10.1 years                                                  | ≈ 4 mo. run-in; annual questionnaire; taking at least two thirds of the study aspirin or aspirin placebo, was 76% at 5 years and 67% at 10 years, with an average of 73% throughout the trial |
| Wactawski-Wende 2006 <sup>58</sup>  | Women's Health Initiative study (WHI)                                               | USA                                 | Randomized, double-blind, placebo-controlled trial; parallel                                                                          | Calcium carbonate 1000 mg/day (elemental calcium) + vitamin D3 400 IU/ day (taken in two divided doses daily) (n= 18,176); Placebo (n= 18,106)                                                                                                                      | Hip fractures                                                                    | Other fractures, colorectal cancer                                                    | 7 years                                                     | No run-in period; weighing returned pill bottles; 70 % took >50% of their study medication through year 6                                                                                     |
| Lappe 2007 <sup>59</sup>            | NA                                                                                  | USA                                 | Randomized, double-blind, placebo-                                                                                                    | Calcium (calcium citrate 1400 mg/day OR calcium carbonate                                                                                                                                                                                                           | Fracture                                                                         | Cancer                                                                                | 4 years                                                     | No run-in period; weighing returned                                                                                                                                                           |

| Author year, (reference)            | Study name                                                       | Location | Design                                                                                                                                                                                                                                                                                                                                            | Interventions (n=number of subjects randomized)                                                                                                                                                                                                                                                                         | Primary outcome | Secondary outcomes         | Treatment duration (mean/median)                                                         | Adherence – strategies and study compliance                     |
|-------------------------------------|------------------------------------------------------------------|----------|---------------------------------------------------------------------------------------------------------------------------------------------------------------------------------------------------------------------------------------------------------------------------------------------------------------------------------------------------|-------------------------------------------------------------------------------------------------------------------------------------------------------------------------------------------------------------------------------------------------------------------------------------------------------------------------|-----------------|----------------------------|------------------------------------------------------------------------------------------|-----------------------------------------------------------------|
|                                     |                                                                  |          | controlled trial; 3 arms                                                                                                                                                                                                                                                                                                                          | 1500 mg/day) (n= 445);<br>Calcium + vitamin D 1000 -1100 IU/day (n=446);<br>Placebo (n = 288)<br>(article reports two different doses of vitamin D in abstract and methods)                                                                                                                                             |                 |                            |                                                                                          | pill bottles in 6-mo interval; mean adherence (74-86%) reported |
| Cook 2007/Lin 2009 <sup>14,15</sup> | The Women's Antioxidant Cardiovascular Study (WACS)              | USA      | Randomized, double-blind, placebo-controlled trial; 2X2X2 factorial design; participants were assigned to several antioxidants—vitamin E, vitamin C, beta-carotene: approximately 2 to 3 years following randomization to the antioxidant arms, a folic acid–vitamin B6/B12 component was added to the trial (called WAFAC study; subset of WACS) | For our analysis, we categorized interventions into (provided by author):<br>any antioxidants (vitamin C 500 mg/day + vitamin E 600 IU EOD + beta-carotene 50 mg EOD) (n=7149);<br>Placebo (n= 1022)<br>[WACS period prior to WAFACS, randomized only to antioxidants (June 1995- October 1996 through April 15, 1998)] | CV events       | Cancer , overall mortality | ≈ 8 years (for those participants not agreed to be a part of WAFACS; provided by author) | No run-in period; self-report; mean adherence 76% reported      |
| Zhang 2008 <sup>16</sup>            | Women's Antioxidant and Folic Acid Cardiovascular Study (WAFACS) | USA      | Randomized, double-blind, placebo-controlled trial (WACS is the parent trial of WAFACS– 4-arm factorial design; The WAFACS population was first                                                                                                                                                                                                   | For our analysis, we categorized interventions into (provided by author):<br>folic acid with vitamins B alone (Folic acid 2.5 mg/day + vitamin B12 1 mg/day + vitamin B6 50 mg/day) (n=342);<br>Antioxidants alone (vitamin C 500                                                                                       | CV events       | Cancer , overall mortality | 6.8 years (provided by author)<br>Reported 7.3 years                                     | No run-in period; self-report; mean adherence 83% reported      |

| Author year, (reference)       | Study name                                              | Location                     | Design                                                                           | Interventions (n=number of subjects randomized)                                                                                                                                                                                                                                                                                                                                                                          | Primary outcome                       | Secondary outcomes | Treatment duration (mean/median) | Adherence – strategies and study compliance                                                                 |
|--------------------------------|---------------------------------------------------------|------------------------------|----------------------------------------------------------------------------------|--------------------------------------------------------------------------------------------------------------------------------------------------------------------------------------------------------------------------------------------------------------------------------------------------------------------------------------------------------------------------------------------------------------------------|---------------------------------------|--------------------|----------------------------------|-------------------------------------------------------------------------------------------------------------|
|                                |                                                         |                              | only in WACS and then randomized to folic acid and vitamins B on April 16, 1998) | mg/day + vitamin E 600 IU EOD + beta-carotene 50 mg EOD) (n= 2376);<br>Folic acid with vitamins B + antioxidants (n = 2379);<br>Placebo alone (n= 345)<br>[April 16, 1998 - July 31, 2005 ]                                                                                                                                                                                                                              |                                       |                    |                                  |                                                                                                             |
| Lippman 2009 <sup>60</sup>     | Selenium and Vitamin E Cancer Prevention Trial (SELECT) | USA, Canada, and Puerto Rico | Randomized, double blind, placebo-controlled trial; 2x2 factorial design         | Selenium 200 microgram/day (n = 8910);<br>vitamin E 400 IU/day (n = 8904);<br>selenium + vitamin E (n = 8863);<br>placebo (n = 8856)                                                                                                                                                                                                                                                                                     | Prostate cancer                       | Other cancers      | 5.5 years                        | No run-in period; follow-up every 6 mo.; blood assay; pill count; adherence 83% at year 1 and 65% at year 5 |
| Gaziano 2009 <sup>12</sup>     | The Physicians' Health Study II (PHS II)                | USA                          | Randomized, double blind, placebo-controlled trial; 2x2x2x2 factorial design     | Participants were assigned to one of 16 possible combinations of vitamin C (500 mg/day), vitamin E (400 IU EOD), beta-carotene (terminated early), a multivitamin, or their placebos.<br>For our analysis, we categorized interventions into (provided by author):<br>Any anti-oxidants (including multivitamins) (n=13619):<br>Placebo alone (n=901)<br>Participants with prior cancer event at baseline were excluded. | CV disease, Prostate and total cancer | Other cancers      | 8 years                          | 3 mo. run-in; annual questionnaire; adherence 78% reported.                                                 |
| Armitage 2010 <sup>61,62</sup> | Study of the Effectiveness of Additional Reductions     | UK                           | Randomized, double blind, placebo-controlled trial; 2x2 factorial design         | Folic acid 2 mg/day + vitamin B12 1 mg/day (n= 6033);<br>Placebo (n= 6031)<br>[factorial trial; approximately 50% of participants in both vitamin E and                                                                                                                                                                                                                                                                  | CV events                             | Cancer             | 6.7 years                        | run-in period (duration not mentioned); pill count; blood assay; adherence around                           |

| Author year, (reference)                                                                                                         | Study name                                  | Location     | Design                                                       | Interventions (n=number of subjects randomized)                                                     | Primary outcome     | Secondary outcomes                              | Treatment duration (mean/median) | Adherence – strategies and study compliance                                                                                      |
|----------------------------------------------------------------------------------------------------------------------------------|---------------------------------------------|--------------|--------------------------------------------------------------|-----------------------------------------------------------------------------------------------------|---------------------|-------------------------------------------------|----------------------------------|----------------------------------------------------------------------------------------------------------------------------------|
|                                                                                                                                  | in Cholesterol and Homocysteine (SEARCH)    |              |                                                              | placebo groups also received simvastatin, 20-80 mg/day]                                             |                     |                                                 |                                  | 90% after 1 year and 84% after 6 years                                                                                           |
| Hankey 2012 <sup>63,64</sup>                                                                                                     | Vitamins to Prevent Stroke (VITATOPS) trial | 20 countries | Randomized, double blind, placebo-controlled trial; parallel | Folic acid 2 mg/day + vitamin B6 25 mg/day + vitamin B12 0.5 mg/day (n= 4089);<br>Placebo (n= 4075) | CV events           | Cancer , overall mortality                      | 3.4 years                        | No run-in period; follow-up every 6 mo.; blood assay; adherence-unclear                                                          |
| Gao 2013 <sup>65</sup>                                                                                                           | NA                                          | China        | Open-control; parallel                                       | Folic acid 1 mg/ day (n=430);<br>Control (without folic acid or multivitamins) (n=430)              | Colorectal adenomas | Number, size, location and sub-type of adenomas | 3 years                          | 2 weeks run-in period; follow-up visit and enquiry (for control group: telephone enquiry or self-report); adherence-not reported |
| EOD: every other day; NA: not available or not applicable; CV: cardiovascular; MI: myocardial infarction; IU: international unit |                                             |              |                                                              |                                                                                                     |                     |                                                 |                                  |                                                                                                                                  |

**Table S3.2- Population characteristics of RCTs reported early risk of CRC incidence**

| Author, year                                       | Study name | Population                                                                                     | No. of participants randomized | Age          | Sex (% males) | Smokers (% current) | Baseline comparability between groups | Number of randomized participants excluded from main analysis                                                                            |
|----------------------------------------------------|------------|------------------------------------------------------------------------------------------------|--------------------------------|--------------|---------------|---------------------|---------------------------------------|------------------------------------------------------------------------------------------------------------------------------------------|
| Gann 1993/<br>Hennekens<br>1996 <sup>22,23</sup>   | PHS        | Male physician                                                                                 | 22,071                         | Mean, 53     | 100           | 11                  | Yes                                   | 0 of 22,071 (0%) excluded from main analysis                                                                                             |
| Peto 1988 <sup>9,10,44</sup>                       | BMD        | Male physicians                                                                                | 5139                           | Mean, 61.6   | 100           | 18                  | Yes                                   | 0 of 5139 (0%) excluded from analysis                                                                                                    |
| Farrell 1991 <sup>9,10,45</sup>                    | UK-TIA     | History of TIA or stroke                                                                       | 2449                           | Mean, 60.3   | 73%           | 52                  | Yes                                   | 0 of 2435 (0%) excluded from analysis                                                                                                    |
| Omenn 1996 <sup>46,47</sup>                        | CARET      | Smokers, former smokers and workers exposed to asbestos at high risk of developing lung cancer | 18,314                         | Mean, 57     | 66            | 60                  | Yes                                   | 0 of 18,314 (0%) excluded from main analysis                                                                                             |
| HPS group 2002 <sup>48</sup>                       | HPS        | History of coronary and other occlusive arterial disease or diabetes                           | 20, 536                        | Range, 40–80 | 75            | NA                  | Yes                                   | 67 of 20,536 (0.3%) participants without information to end of the scheduled treatment period for mortality and morbidity were excluded. |
| Duffield-Lillico 2002 <sup>49,50</sup>             | NPCT       | History of non-melanoma skin cancer                                                            | 1312                           | Mean, 63     | 75            | 28.5                | Yes                                   | 62 of 1312 (5%) participants excluded as no valid baseline selenium values                                                               |
| Albanes 2000/Virtamo 2003 <sup>3,51,52,66,67</sup> | ATBC       | Male cigarette smokers                                                                         | 29,133                         | Mean, 57     | 100           | 100                 | Yes                                   | 9061 of 29,133 (31%) participants left the study for any reason, including death. All participants were included for main analysis.      |
| Trivedi 2003 <sup>53</sup>                         | NA         | Doctors and the general practice population                                                    | 2686                           | Mean, 75     | 76            | 56                  | Yes                                   | 0 of 2686 (0%) excluded from analysis                                                                                                    |
| Zhu 2003 <sup>54</sup>                             | NA         | Patients with atrophic gastritis                                                               | 216                            | Mean, 56     | 63            | NA                  | Unclear                               | 0 of 216 (0%) excluded from analysis                                                                                                     |

| Author, year                          | Study name      | Population                                             | No. of participants randomized | Age      | Sex (% males) | Smokers (% current) | Baseline comparability between groups | Number of randomized participants excluded from main analysis                                                                                                                                                                                                                                                    |
|---------------------------------------|-----------------|--------------------------------------------------------|--------------------------------|----------|---------------|---------------------|---------------------------------------|------------------------------------------------------------------------------------------------------------------------------------------------------------------------------------------------------------------------------------------------------------------------------------------------------------------|
| Hercberg 2004 <sup>55,56</sup>        | SU.VI.MA X      | General population                                     | 13,017                         | Mean, 49 | 39            | 16                  | Yes                                   | 1567 of 13,017 (12%) lost to follow-up. All participants were included for main analysis.                                                                                                                                                                                                                        |
| Lonn 2005/ <sup>25,57</sup>           | HOPE/<br>HOPE-2 | History of CV disease or diabetes                      | 9541                           | Mean, 66 | 73            | 14                  | Yes                                   | 0 of 9541 (0%) excluded from main analysis                                                                                                                                                                                                                                                                       |
| Lonn 2006 <sup>24,26</sup>            |                 |                                                        | 5504                           | Mean, 69 | 72            | 11.5                | Yes                                   | 37 of 5522 (0.7%) participants did not complete the study (declined to continue or lost to follow-up). All participants were included for main analysis.                                                                                                                                                         |
| Cook 2005/Lee 2005 <sup>13,27</sup>   | WHS             | Female health professionals                            | 39,876                         | Mean, 55 | 0             | 13                  | Yes                                   | 1596 of 39,876 (4%) with unknown vital status or dead. All participants were included for main analysis.                                                                                                                                                                                                         |
| Wactawski-Wende 2006 <sup>58,68</sup> | WHI             | Postmenopausal women                                   | 36,282                         | Mean, 59 | 0             | 0.12 (annualized %) | Yes                                   | 2531 of 36,282 (7%) participants died, withdrawn or lost to follow-up. All participants were included for main analysis.                                                                                                                                                                                         |
| Lappe 2007 <sup>59</sup>              | NA              | Postmenopausal women                                   | 1179                           | Mean, 67 | 0             | NA                  | NA                                    | 92 of 1179 (8%) lost to follow-up. All participants were included for 1-4 year analysis.                                                                                                                                                                                                                         |
| Cook 2007/Lin 2009 <sup>14,15</sup>   | WACS            | Female health professionals at high risk of CV disease | 8171 (only to WACS-2729)       | Mean, 60 | 0             | 15                  | Yes                                   | 544 of 8171 (7%) excluded; with prior history of cancer before enrolment. All participants were included for main analysis (follow-up 2.2 years). 5442 WACS participants agreed to continue WAFACS. Hence, we used only data from 2729 participants those who not agreed to participate in WAFACS (67% excluded) |
| Zhang 2008 <sup>16</sup>              | WAFACS          | Female health professionals at high risk of CV disease | 5442                           | Mean, 63 | 0             | 11.8                | Yes                                   | 418 of 5442 (7.6%) excluded; with prior history of cancer before enrolment. All participants were included for main analysis                                                                                                                                                                                     |
| Lippman                               | SELECT          | General population                                     | 35,533                         | Median,  | 100           | 8                   | Yes                                   | 645 of 35,533 (2%) excluded from primary                                                                                                                                                                                                                                                                         |



| Author, year                                                                    | Study name | Population                                             | No. of participants randomized | Age      | Sex (% males) | Smokers (% current) | Baseline comparability between groups | Number of randomized participants excluded from main analysis                                                      |
|---------------------------------------------------------------------------------|------------|--------------------------------------------------------|--------------------------------|----------|---------------|---------------------|---------------------------------------|--------------------------------------------------------------------------------------------------------------------|
| 2009 <sup>60</sup>                                                              |            | (men only)                                             |                                | 62-63    |               |                     |                                       | analysis as ineligible, insufficient data or lost to follow-up.                                                    |
| Gaziano 2009 <sup>12</sup>                                                      | PHS II     | Male physicians                                        | 14,641                         | Mean, 64 | 100           | 3.5                 | Yes                                   | 121 of 14,641 (1%) not analysed for colorectal cancer; prior history of colorectal cancer at baseline              |
| Armitage 2010 <sup>61,62</sup>                                                  | SEARCH     | History of MI                                          | 12,064                         | Mean, 64 | 83            | 12                  | Yes                                   | 119 of 12,064 (6%) not completed follow-up. All participants were included for main analysis.                      |
| Hankey 2012 <sup>63,64</sup>                                                    | VITATOP S  | History of recent stroke or transient ischaemic attack | 8164                           | Mean, 62 | 64            | 50 (ever smoked)    | Yes                                   | 702 of 8164 (8.6%) lost to follow-up. All participants were included for main analysis.                            |
| Gao 2013 <sup>65</sup>                                                          | NA         | General population                                     | 860                            | Mean, 61 | 50%           | 17.3                | Yes                                   | 69 of 860 (8%) participants not completed follow-up colonoscopy. All participants were included for main analysis. |
| NA: not available/not applicable; CV: cardiovascular; MI: myocardial infarction |            |                                                        |                                |          |               |                     |                                       |                                                                                                                    |

**Table S3.3- Efficacy outcomes of RCTs reported early risk of CRC incidence**

| Author, year (reference)                               | Study name | Study group                                                           | Efficacy outcome<br>Incidence of CRC (n/N) | Remarks                                                                                                                                                  |
|--------------------------------------------------------|------------|-----------------------------------------------------------------------|--------------------------------------------|----------------------------------------------------------------------------------------------------------------------------------------------------------|
| Gann 1993/<br>Hennekens<br>1996 <sup>22,23,69,70</sup> | PHS-I      | Aspirin 325 mg EOD (5 years)                                          | 63/11 037                                  | Description provided in Appendix 2 (Table 2.4).                                                                                                          |
|                                                        |            | No aspirin ( 5 years)                                                 | 55/11034                                   |                                                                                                                                                          |
|                                                        |            | Beta-carotene 50 mg EOD (12 years)                                    | 167/11036                                  |                                                                                                                                                          |
|                                                        |            | Aspirin 325 mg EOD (5 years)                                          | 174/11035                                  |                                                                                                                                                          |
| Peto 1988 <sup>9,10,44</sup>                           | BMD        | Aspirin 500 mg (or 300 mg if requested) daily                         | 28/3429                                    | Long-term follow-up results also reported.                                                                                                               |
|                                                        |            | No aspirin                                                            | 17/1710                                    | Considered as ASA-HD (no data for individual dose available). Long-term follow-up results also reported.                                                 |
| Farrell 1991 <sup>9,10,45</sup>                        | UK-TIA     | Aspirin 300 mg daily or 600 mg twice daily (1200 mg total per day)    | 18/1632                                    |                                                                                                                                                          |
|                                                        |            | Placebo                                                               | 8/817                                      |                                                                                                                                                          |
| Omenn 1996 <sup>46,47,71</sup>                         | CARET      | Vitamin A 25,000 IU + beta-carotene 30 mg/day                         | 56/9420                                    | Post-trial follow-up data of CARET also reported and analysed separately.                                                                                |
|                                                        |            | Placebo                                                               | 36/8894                                    |                                                                                                                                                          |
| HPS group 2002 <sup>48,70,71</sup>                     | HPS        | Vitamin C 250 mg/day + vitamin E 600 mg/day + beta-carotene 20 mg/day | 117/10269                                  | We used the initial number of randomized participants for analysis                                                                                       |
|                                                        |            | Placebo                                                               | 140/10267                                  |                                                                                                                                                          |
| Duffield-Lillico 2002 <sup>49,50,71</sup>              | NPCT       | Selenium 200 microgram/day                                            | 9/653                                      | We used the initial number of randomized participants for analysis.                                                                                      |
|                                                        |            | Placebo                                                               | 19/659                                     |                                                                                                                                                          |
| Albanes 2000/Virtamo 2003 <sup>3,51,52,66</sup>        | ATBC       | Vitamin E 50 mg/day                                                   | 29/7286                                    | Post-trial follow-up data of ATBC also reported and analysed separately. We used the initial number of randomized participants for analysis as reported. |
|                                                        |            | Beta-carotene 20 mg/day                                               | 39/7282                                    |                                                                                                                                                          |
|                                                        |            | Vitamin E 50 mg/day + Beta-carotene 20 mg/day                         | 30/7278                                    |                                                                                                                                                          |
|                                                        |            | Placebo                                                               | 37/7287                                    |                                                                                                                                                          |
| Trivedi 2003 <sup>53</sup>                             | NA         | Vitamin D3 100 000 IU every four months                               | 28/1345                                    | Reported as colon cancer.                                                                                                                                |
|                                                        |            | Placebo                                                               | 27/1341                                    |                                                                                                                                                          |
| Zhu 2003 <sup>54</sup>                                 | NA         | Folic acid + vitamin B12                                              | 0/44                                       | Data on beta-carotene natural and synthetic analysed together                                                                                            |
|                                                        |            | Beta-carotene (natural and synthetic)                                 | 0/118                                      |                                                                                                                                                          |

| Author, year (reference)               | Study name           | Study group                                                         | Efficacy outcome                   | Remarks                                                                                                   |
|----------------------------------------|----------------------|---------------------------------------------------------------------|------------------------------------|-----------------------------------------------------------------------------------------------------------|
|                                        |                      |                                                                     | Incidence of CRC (n/N)             |                                                                                                           |
|                                        |                      | Placebo                                                             | 1/54                               |                                                                                                           |
| Hercberg 2004 <sup>55,56</sup>         | SU.VI.MAX            | Vitamin C + vitamin E + beta-carotene + selenium + zinc             | 21/6481                            | We used the initial number of randomized participants for analysis as reported.                           |
|                                        |                      | Placebo                                                             | 24/6536                            |                                                                                                           |
| Lonn 2005 <sup>25,70</sup>             | HOPE/<br>HOPE<br>TOO | Vitamin E 400 IU/day                                                | 69/4761                            | Used all HOPE Study participants. Description provided in Appendix 2 (Table 2.4).                         |
|                                        |                      | Placebo                                                             | 57/4780                            |                                                                                                           |
| Lonn 2006 <sup>24,26,70</sup>          | HOPE-2               | Folic acid 2.5 mg/day + vitamin B6 50 mg/day + vitamin B12 1 mg/day | 50/2758                            | HOPE-2 (Lonn 2006) is a subset of HOPE/HOPE-TOO trial. Description provided in Appendix 2 (Table 2.4).    |
|                                        |                      | Placebo                                                             | 37/2764                            |                                                                                                           |
| Cook 2005/Lee 2005 <sup>13,27,72</sup> | WHS                  | Aspirin 100 mg EOD + vitamin E 600 IU EOD                           | 75/9,966                           | Authors provided data for factorial arms on request. Description provided in Appendix 2 (Table 2.4).      |
|                                        |                      | Aspirin 100 mg EOD                                                  | 69/9,968                           |                                                                                                           |
|                                        |                      | Vitamin E 600 IU EOD                                                | 68/9,971                           |                                                                                                           |
|                                        |                      | Placebo                                                             | 82/9,971                           |                                                                                                           |
| Wactawski-Wende 2006 <sup>58,70</sup>  | WHI                  | Calcium 1000 mg/day (elemental calcium) + vitamin D3 400 IU/day     | 168/18,176                         | A total of 339 colorectal cancers were reported. Analyses limited to the 322 invasive colorectal cancers. |
|                                        |                      | Placebo                                                             | 154/18,106                         |                                                                                                           |
| Lappe 2007 <sup>59</sup>               | NA                   | Calcium (as Ca. citrate 1400 mg/day or Ca. carbonate 1500 mg/day)   | 0/445                              | Reported as colon cancer.                                                                                 |
|                                        |                      | Calcium 1400-1500 mg/day + vitamin D 1000-1100 IU/day               | 1/446                              |                                                                                                           |
|                                        |                      | Placebo                                                             | 2/288                              |                                                                                                           |
| Cook 2007/Lin 2009 <sup>14,15</sup>    | WACS                 | Any antioxidants                                                    | 3/7149 (2.2 yrs)<br>5/2394 (8 yrs) | Description provided in Appendix 2 (Table 2.4).                                                           |
|                                        |                      | Placebo                                                             | 2/1022(2.2 yrs)<br>2/335 (8 yrs)   |                                                                                                           |
| Zhang 2008 <sup>16</sup>               | WAFACS               | Folic acid with vitamins B (B12 and B6)                             | 2/342                              | Description provided in Appendix 2 (Table 2.4).                                                           |
|                                        |                      | Antioxidants                                                        | 20/2376                            |                                                                                                           |
|                                        |                      | Folic acid with vitamins B +                                        | 16/2379                            |                                                                                                           |

| Author, year (reference)                                                                                                                                                                                                                                                                                                                                                                                                                                                                                                                                                                                                                                                   | Study name | Study group                                                         | Efficacy outcome<br>Incidence of CRC (n/N) | Remarks                                                                                                                                                                 |
|----------------------------------------------------------------------------------------------------------------------------------------------------------------------------------------------------------------------------------------------------------------------------------------------------------------------------------------------------------------------------------------------------------------------------------------------------------------------------------------------------------------------------------------------------------------------------------------------------------------------------------------------------------------------------|------------|---------------------------------------------------------------------|--------------------------------------------|-------------------------------------------------------------------------------------------------------------------------------------------------------------------------|
|                                                                                                                                                                                                                                                                                                                                                                                                                                                                                                                                                                                                                                                                            |            | antioxidants                                                        |                                            |                                                                                                                                                                         |
|                                                                                                                                                                                                                                                                                                                                                                                                                                                                                                                                                                                                                                                                            |            | Placebo                                                             | 2/345                                      |                                                                                                                                                                         |
| Lippman 2009 <sup>60</sup>                                                                                                                                                                                                                                                                                                                                                                                                                                                                                                                                                                                                                                                 | SELECT     | Selenium 200 microgram/day                                          | 63/8910                                    | We used the initial number of randomized participants to each trial arm.                                                                                                |
|                                                                                                                                                                                                                                                                                                                                                                                                                                                                                                                                                                                                                                                                            |            | Vitamin E 400 IU/day                                                | 66/8904                                    |                                                                                                                                                                         |
|                                                                                                                                                                                                                                                                                                                                                                                                                                                                                                                                                                                                                                                                            |            | Selenium + vitamin E                                                | 77/8863                                    |                                                                                                                                                                         |
|                                                                                                                                                                                                                                                                                                                                                                                                                                                                                                                                                                                                                                                                            |            | Placebo                                                             | 60/8856                                    |                                                                                                                                                                         |
| Gaziano 2009 <sup>12</sup>                                                                                                                                                                                                                                                                                                                                                                                                                                                                                                                                                                                                                                                 | PHS II     | Any antioxidants                                                    | 152/13619                                  | Authors provided data for two arms on request. 121 of 14,641 participants not analysed for colorectal cancer because of prior history of colorectal cancer at baseline. |
|                                                                                                                                                                                                                                                                                                                                                                                                                                                                                                                                                                                                                                                                            |            | Placebo                                                             | 43/13619                                   |                                                                                                                                                                         |
| Armitage 2010 <sup>61,62</sup>                                                                                                                                                                                                                                                                                                                                                                                                                                                                                                                                                                                                                                             | SEARCH     | Folic acid 2 mg/day + vitamin B12 1 mg/day                          | 86/6033                                    | Nil                                                                                                                                                                     |
|                                                                                                                                                                                                                                                                                                                                                                                                                                                                                                                                                                                                                                                                            |            | Placebo                                                             | 91/6031                                    |                                                                                                                                                                         |
| Hankey 2012 <sup>63,64</sup>                                                                                                                                                                                                                                                                                                                                                                                                                                                                                                                                                                                                                                               | VITATOPS   | Folic acid 2 mg/day + vitamin B6 25 mg/day + vitamin B12 0.5 mg/day | 21/4089                                    | Nil                                                                                                                                                                     |
|                                                                                                                                                                                                                                                                                                                                                                                                                                                                                                                                                                                                                                                                            |            | Placebo                                                             | 21/4075                                    |                                                                                                                                                                         |
| Gao 2013 <sup>65</sup>                                                                                                                                                                                                                                                                                                                                                                                                                                                                                                                                                                                                                                                     | NA         | Folic acid 1 mg/day                                                 | 2/430                                      | Nil                                                                                                                                                                     |
|                                                                                                                                                                                                                                                                                                                                                                                                                                                                                                                                                                                                                                                                            |            | Control                                                             | 2/430                                      |                                                                                                                                                                         |
| <p><b>All our analyses followed the intention-to-treat principle. We used the initial number of randomized participants to each trial arm and performed the analyses irrespective of how the authors of the original trials had analysed the data. Participants who were lost to follow-up were considered survivors, free of colorectal cancers/adverse events.</b></p> <p>n: number of events; N: number of randomized participants; EOD: every other day; NA: not available or not applicable; CV: cardiovascular; MI: myocardial infarction; IU: international unit; ADR: adverse events; CRC: colorectal cancer; GIB: gastrointestinal bleeding; PU: peptic ulcer</p> |            |                                                                     |                                            |                                                                                                                                                                         |

**Table S3.4- Risk of bias assessment (Revised Cochrane risk of bias tool for randomized trials (RoB 2.0) of RCTs reported early risk of CRC incidence**

| We used unpublished data and assumptions for several studies in our analysis (appendix 2), which is provided by authors and we followed direction from authors of these studies for data extraction for our analysis. Hence, we followed ROB assessment by considering the provided data and comments from authors, not solely based on the original papers published. |           |   |   |   |   |   |   |
|------------------------------------------------------------------------------------------------------------------------------------------------------------------------------------------------------------------------------------------------------------------------------------------------------------------------------------------------------------------------|-----------|---|---|---|---|---|---|
| Author, year                                                                                                                                                                                                                                                                                                                                                           | Study     | A | B | C | D | E | F |
| Gann 1993 <sup>22,23</sup>                                                                                                                                                                                                                                                                                                                                             | PHS (ASA) | + | + | + | + | - | - |
| Hennekens 1996 <sup>22,23</sup>                                                                                                                                                                                                                                                                                                                                        | PHS (AO)  | + | + | + | + | + | + |
| Peto 1988 <sup>9,10,44</sup>                                                                                                                                                                                                                                                                                                                                           | BDAT      | + | ? | + | + | + | + |
| Farrell 1991 <sup>9,10,45</sup>                                                                                                                                                                                                                                                                                                                                        | UK-TIA    | + | + | + | + | + | + |
| Omenn 1996 <sup>46,47</sup>                                                                                                                                                                                                                                                                                                                                            | CARET     | + | + | + | + | ? | + |
| HPS group 2002 <sup>48</sup>                                                                                                                                                                                                                                                                                                                                           | HPS       | + | + | + | + | + | + |
| Duffield-Lillico 2002 <sup>49,50</sup>                                                                                                                                                                                                                                                                                                                                 | NPCT      | + | + | + | + | + | + |
| Albanes 2000/Virtamo 2003 <sup>3,51</sup>                                                                                                                                                                                                                                                                                                                              | ATBC      | + | + | ? | + | + | + |
| Trivedi 2003 <sup>53</sup>                                                                                                                                                                                                                                                                                                                                             | NA        | + | + | + | + | + | ? |
| Zhu 2003 <sup>54</sup>                                                                                                                                                                                                                                                                                                                                                 | NA        | - | ? | + | ? | ? | - |
| Herberg 2004 <sup>55,56</sup>                                                                                                                                                                                                                                                                                                                                          | SU.VI.MAX | + | + | + | + | + | + |
| Lonn 2006 <sup>24,26</sup>                                                                                                                                                                                                                                                                                                                                             | HOPE-2    | + | + | + | + | + | + |
| Cook 2005/Lee 2005 <sup>13,27</sup>                                                                                                                                                                                                                                                                                                                                    | WHS       | + | + | + | + | + | + |
| Wactawski-Wende 2006 <sup>58,68</sup>                                                                                                                                                                                                                                                                                                                                  | WHI       | + | + | + | + | + | + |
| Lappe 2007 <sup>59</sup>                                                                                                                                                                                                                                                                                                                                               | NA        | - | + | ? | + | + | + |
| Cook 2007/Lin 2009 <sup>14,15</sup>                                                                                                                                                                                                                                                                                                                                    | WACS      | + | + | - | + | ? | - |
| Zhang 2008 <sup>16</sup>                                                                                                                                                                                                                                                                                                                                               | WAFACS    | + | + | + | + | + | + |
| Lippman 2009 <sup>60</sup>                                                                                                                                                                                                                                                                                                                                             | SELECT    | + | + | + | + | + | + |
| Gaziano 2009 <sup>12</sup>                                                                                                                                                                                                                                                                                                                                             | PHS II    | + | + | + | + | + | + |
| Armitage 2010 <sup>61,62</sup>                                                                                                                                                                                                                                                                                                                                         | SEARCH    | + | + | + | + | + | + |
| Hankey 2012 <sup>63,64</sup>                                                                                                                                                                                                                                                                                                                                           | VITATOPS  | + | + | + | + | + | + |
| Gao 2013 <sup>65</sup>                                                                                                                                                                                                                                                                                                                                                 | NA        | ? | + | + | + | + | + |

A-Bias arising from the randomization process; B- Bias due to deviations from intended interventions; C- Bias due to missing outcome data; D- Bias in measurement of the outcome; E-Bias in selection of the reported result; F-Overall bias.

+symbol/green colour means 'low risk of bias'; symbol/yellow colour means 'some concerns'; - symbol/red colour means 'high risk of bias'

**Gann 1993 (PHS):** primary outcome was CV events. Aspirin component terminated early (after 5 years). *Author's comment*-“No data available for separate arms; not recommend utilizing the Gann paper as the sole data source for PHS I (original data not published)– it was not analysed as a RCT in the way our other main PHS analyses were typically conducted; analysis needs to be considered with caveats.” But not applicable for anti-oxidants arms. **Judgment: plausible bias that seriously weakens confidence in the results for aspirin report (Gann 1993).**

**Peto 1988 (BDAT):** low risk (Randomization-yes; allocation concealment: no information; baseline comparability: similar); some concerns (participants aware about blinding (open label) and there is no information on whether there were deviations from usual practice that were likely to impact on the outcome. **Judgment: no plausible bias may seriously weakens confidence in the results (low risk).**

**Omenn 1996 (CARET):** interim analysis of CARET study (1995- mean of 4.0 years of follow-up after randomization); promptly after 1996, announced that active intervention has stopped because of no evidence of benefit. **Judgment: no plausible bias that seriously weakens confidence in the results (low risk).**

**ATBC:** 9061 of 29,133 (31%) participants left the study for any reason, including death; the groups differed in the number of such dropouts by less than 37 (unclear) **Judgment: plausible bias that seriously weakens confidence in the results.**

**Trivedi 2003:** Used questionnaire-“incidences of cancer by using events identified from questionnaires or death certification by cause”. **Judgment: no plausible bias that seriously weakens confidence in the results (low risk).**

**Zhu 2003:** Allocation probably not concealed; baseline comparability unclear; participants were consecutive out-patients (inadequate random sequence); blinding unclear for participants, personals and outcome assessors. **Judgment: plausible bias that seriously weakens confidence in the results.**

**Lappe 2007:** Allocation concealment-unclear; baseline comparability no reported; 92 of 1179 (8%) lost to follow-up; proportion and reasons for missing among groups not given. **Judgment: plausible bias that seriously weakens confidence in the results.**

**WACS:** In our analysis, we used data from 2729 participants (provided by author) not participated in WAFACS (refer: Table A.6). Due to the high attrition rate in the available data, analysis needs to be considered with caveats. **Judgment: plausible bias (due to the data provided by authors-high attrition rate) that seriously weakens confidence in the results (not the original paper).**

**Gao 2013:** Allocation concealment –probably not done; no differences in baseline characteristics

**Table S3.5-Characteristics of RCTs reported either long-term risk of CRC incidence or mortality**

| Author, year (reference)        | Study name                                                                 | Location       | Follow-up of placebo controlled and double-blind trial | Number of participants randomized | Interventions                                                                                                                                                                                                                                                                            | Treatment duration (follow-up) in years               | Method of post-trial follow-up           | Trial Primary Outcomes                                     | Number of randomized participants excluded from post-trial analysis                                                                                              |
|---------------------------------|----------------------------------------------------------------------------|----------------|--------------------------------------------------------|-----------------------------------|------------------------------------------------------------------------------------------------------------------------------------------------------------------------------------------------------------------------------------------------------------------------------------------|-------------------------------------------------------|------------------------------------------|------------------------------------------------------------|------------------------------------------------------------------------------------------------------------------------------------------------------------------|
| Peto 1988 <sup>9,10,44</sup>    | British doctor aspirin trial (BDA) follow-up                               | UK             | Open control                                           | 5139                              | Aspirin 500 mg/day (or 300 if requested)-classified as ASA-HD (n= 3429); Control (n= 1710)                                                                                                                                                                                               | Mean 6 [at least 5 years for all patients] (up to 23) | Death certification, cancer registration | CV events; mortality from CV causes                        | 0 of 18,314 (0%) participants excluded from main analysis                                                                                                        |
| Farrell 1991 <sup>9,10,45</sup> | United Kingdom transient ischaemic attack (UK-TIA) aspirin trial follow-up | UK and Ireland | Yes                                                    | 2449                              | Aspirin 300 mg/day (n=811); Aspirin 1200 mg/day (n=821); Placebo (n=817)                                                                                                                                                                                                                 | Median 4.4 [1-7 years] (up to 21-27)                  | Death certification, cancer registration | CV events; mortality from vascular and non-vascular causes | 0 of 2449 (0%) participants excluded from post-trial analysis. 14 of 2449 (0.6%) participants' data were not available for trial analysis (for safety outcomes). |
| Sturmer 1998 <sup>8,22,69</sup> | Physicians' Health Study (PHS) follow-up                                   | USA            | Yes                                                    | 22,071                            | Participants were assigned to aspirin 325 mg EOD and beta-carotene 50 mg EOD in 2X2 factorial design. The aspirin arm of the study was terminated early (after 5 years); Aspirin 325 mg EOD (n=11,037); Placebo (n= 11,034) [half of participants also received beta-carotene component] | Mean 5 (mean 12)                                      | Annual questionnaires ; medical records  | MI and other CV events; cancer                             | 0 of 22,071 (0%) excluded from main analysis                                                                                                                     |

| Author, year (reference)       | Study name                                                                                          | Location | Follow-up of placebo controlled and double-blind trial                                         | Number of participants randomized | Interventions                                                                                                                                                                                     | Treatment duration (follow-up) in years | Method of post-trial follow-up                                          | Trial Primary Outcomes         | Number of randomized participants excluded from post-trial analysis                                                                                                                  |
|--------------------------------|-----------------------------------------------------------------------------------------------------|----------|------------------------------------------------------------------------------------------------|-----------------------------------|---------------------------------------------------------------------------------------------------------------------------------------------------------------------------------------------------|-----------------------------------------|-------------------------------------------------------------------------|--------------------------------|--------------------------------------------------------------------------------------------------------------------------------------------------------------------------------------|
| Virtamo 2003 <sup>3,51</sup>   | Alpha-Tocopherol, Beta-Carotene Cancer Prevention (ATBC) Study follow-up                            | Finland  | Yes                                                                                            | 29,133                            | Vitamin E 50 mg/day (n=7286);<br>Beta-carotene 20 mg/day (n=7282);<br>Vitamin E 50 mg/day + Beta-carotene 20 mg/day (n=7278);<br>Placebo (n= 7287)                                                | Mean 6.1 (mean 12)                      | National registry                                                       | Cancer incidence and mortality | 0 of 29,133 (0%) excluded from CRC analysis                                                                                                                                          |
| Goodman 2004 <sup>4,46</sup>   | Carotene and Retinol Efficacy Trial (CARET) follow-up                                               | USA      | Yes                                                                                            | 18,314                            | Vitamin A 25,000 IU/day + beta-carotene 30 mg/day (n = 9420);<br>Placebo (n = 8894)                                                                                                               | mean ≈4 (mean 10)                       | Medical records and death certificates                                  | Lung cancer; other cancers     | 1174 of 18,314 (6.4%) excluded from analysis. [1092 participants died; 82 participants lost to follow-up]                                                                            |
| Ebbing 2009 <sup>5,28,29</sup> | Norwegian Vitamin Trial (NORVIT) and Western Norway B Vitamin Intervention Trial (WENBIT) follow-up | Norway   | Combined analysis and extended follow-up of participants from 2 RCTs (randomized double-blind) | 6837 (from both trials)           | Folic acid 0.8 mg/day + vitamins B12 0.4 mg/day+ vitamin B6 40 mg/day (n=1708);<br>Folic acid 0.8 mg/day + vitamin B12 0.4 mg/day (n=1703);<br>Vitamin B6 40 mg/day (n=1705);<br>Placebo (n=1721) | Median 3.2 (median 6.4)                 | Cancer registry of Norway; Cause of death registry at statistics Norway | CV outcomes                    | 6261 (91.6%) participants participated in post-trial follow-up; 549 of 6261 participants died and emigrated during post-trial follow-up. 0 of 6837 (0%) excluded from main analysis. |



| Author, year (reference)          | Study name                                                | Location | Follow-up of placebo controlled and double-blind trial          | Number of participants randomized | Interventions                                                                                                                                                                                                                                                          | Treatment duration (follow-up) in years   | Method of post-trial follow-up                        | Trial Primary Outcomes       | Number of randomized participants excluded from post-trial analysis                                         |
|-----------------------------------|-----------------------------------------------------------|----------|-----------------------------------------------------------------|-----------------------------------|------------------------------------------------------------------------------------------------------------------------------------------------------------------------------------------------------------------------------------------------------------------------|-------------------------------------------|-------------------------------------------------------|------------------------------|-------------------------------------------------------------------------------------------------------------|
| Cook 2013 <sup>6,13</sup>         | Women Health Study (WHS) follow-up                        | USA      | Yes                                                             | 39, 876                           | Vitamin E 600 IU EOD and aspirin 100 mg EOD (n=9,966); Vitamin E 600 IU EOD (n=9,971); Aspirin 100 mg EOD (n=9,968); Placebo (n=9,971)<br>[The trial initially contained a beta-carotene component (50mg EOD for 2 years); stopped early due to lack of effectiveness] | Mean 10.1 (mean 18)                       | Questionnaires ; medical records National Death Index | Any invasive cancer          | 0 of 39, 876 (0%) excluded from main analysis.                                                              |
| Cauley 2013 <sup>7,58</sup>       | Women's Health Initiative study (WHI) follow-up           | USA      | Yes                                                             | 36,282                            | Calcium carbonate 1000 mg/day (elemental calcium) + vitamin D3 400 IU/ day (taken in two divided doses daily) (n= 18,176); Placebo (n= 18,106)                                                                                                                         | Mean 7 (mean 11)                          | Medical records                                       | Fractures; colorectal cancer | 6420 of 36,282 (18%) not participated in the extension phase. 0 of 36,282 (0%) excluded from main analysis. |
| Rothwell 2010 <sup>10,73-75</sup> | Thrombosis Prevention Trial (TPT) follow-up <sup>74</sup> | UK       | Analysis of individual patient data from randomized trials (All | 5085                              | Aspirin 75 mg/day (n=2545); Placebo (n=2540)<br>[half of the participants also received warfarin; 2X2 factorial]                                                                                                                                                       | Median 7 [at least 5 years] (range 17-20) | Death certification, cancer registration              | Ischaemic heart disease      | 0 of 5085 (0%) excluded from main analysis.                                                                 |

| Author, year (reference)                                                                                                                                                      | Study name                                                    | Location    | Follow-up of placebo controlled and double-blind trial | Number of participants randomized | Interventions                                                                                         | Treatment duration (follow-up) in years | Method of post-trial follow-up                      | Trial Primary Outcomes                               | Number of randomized participants excluded from post-trial analysis              |
|-------------------------------------------------------------------------------------------------------------------------------------------------------------------------------|---------------------------------------------------------------|-------------|--------------------------------------------------------|-----------------------------------|-------------------------------------------------------------------------------------------------------|-----------------------------------------|-----------------------------------------------------|------------------------------------------------------|----------------------------------------------------------------------------------|
|                                                                                                                                                                               | Swedish Aspirin Low Dose Trial (SALT) follow-up <sup>73</sup> | Sweden      | RCTs were randomized double-blind)                     | 1360                              | Aspirin 75 mg/day (n=676);<br>Placebo (n=684)                                                         | Mean 2.7 [1-5 years] (range 18-23)      | Death certification                                 | Composite outcome of stroke or death from any causes | 0 of 1360 (0%) excluded from main analysis.                                      |
|                                                                                                                                                                               | Dutch TIA trial (DTIA) follow-up <sup>75</sup>                | Netherlands |                                                        | 3131                              | Aspirin 30 mg/day (n=1555);<br>Aspirin 283 mg/day (n=1576) [some participants also received atenolol] | Mean 2.6 [1-4 years] (up to 17)         | Death certification, record review, patient contact | Death from CV causes                                 | 684 of 3131 (22%) participants with unknown vital status; excluded from analysis |
| EOD: every other day; NA: not available or not applicable; CV: cardiovascular; MI: myocardial infarction; IU: international unit; ADR: adverse events; CRC: colorectal cancer |                                                               |             |                                                        |                                   |                                                                                                       |                                         |                                                     |                                                      |                                                                                  |

**Table S3.6-Population characteristics of RCTs reported either long-term risk of CRC incidence or mortality**

| Author, year                      | Study name        | Population                                                                                     | Age at randomisation (mean/median) | Sex (% males) | Smokers (% current) at randomisation | Baseline comparability between groups | Adherence to medications during trial period                                                                                                                                                                           |
|-----------------------------------|-------------------|------------------------------------------------------------------------------------------------|------------------------------------|---------------|--------------------------------------|---------------------------------------|------------------------------------------------------------------------------------------------------------------------------------------------------------------------------------------------------------------------|
| Peto 1988<br>9,10,44,70           | BDAT              | Male physicians                                                                                | 62                                 | 100           | 31                                   | Yes                                   | During the first year after randomisation 19% of the doctors allocated to take aspirin stopped doing so, and during the subsequent five years a further 5% of those originally allocated to aspirin stopped each year  |
| Farell 1991<br>9,45               | UK-TIA            | History of TIA or minor ischaemic stroke                                                       | 60                                 | 73            | 53                                   | Yes                                   | About 12% of patients stopped trial medication before the 4-month follow-up (although some restarted later), and 12% of patients randomised to placebo started taking non-trial aspirin at some stage during the trial |
| Sturmer 1998<br>8,22,69,70        | PHS               | Male physician                                                                                 | 53                                 | 100           | 11                                   | Yes                                   | More than 80% were adherent to intervention                                                                                                                                                                            |
| Virtamo 2003<br>3,51              | ATBC              | Male cigarette smokers                                                                         | 57.2                               | 100           | 100                                  | Yes                                   | Participants took over 95% of their capsules; similar in all arms                                                                                                                                                      |
| Goodman 2004<br>4,46              | CARET             | Smokers, former smokers and workers exposed to asbestos at high risk of developing lung cancer | 57                                 | 66            | 60                                   | Yes                                   | 88% of the participants took over 90% of the prescribed capsules                                                                                                                                                       |
| Ebbing 2009<br>5,28,29            | NORVIT/<br>WENBIT | History of ischemic heart disease                                                              | 62                                 | 76            | 40                                   | Yes                                   | 84.7% of participants took at least 80% of the study capsules                                                                                                                                                          |
| Cook 2013 <sup>6,13</sup>         | WHS               | Postmenopausal women                                                                           | 55                                 | 0             | 13                                   | Yes                                   | 64% of participants in the aspirin group and 65% in the placebo group had used at least two thirds of the study medication                                                                                             |
| Cauley 2013<br>7,58               | WHI               | Postmenopausal women                                                                           | 59                                 | 0             | 7 (extension phase)                  | Yes                                   | 70 % took >50% of their study medication during intervention phase                                                                                                                                                     |
| Rothwell 2010 <sup>10,73-75</sup> | TPT               | High risk for IHD                                                                              | 57.5                               | 100           | 41.2                                 | Yes                                   | only about 2% of tablets (warfarin or aspirin) being missed according to tablet counts at follow-up visits                                                                                                             |
|                                   | SALT              | History of TIA or stroke                                                                       | 70                                 | 66            | 27                                   | Yes                                   | 99 % of the patients had a mean compliance rate of more than 90% over the study period as a whole.                                                                                                                     |

| Author, year | Study name | Population               | Age at randomisation (mean/median) | Sex (% males) | Smokers (% current) at randomisation | Baseline comparability between groups | Adherence to medications during trial period                             |
|--------------|------------|--------------------------|------------------------------------|---------------|--------------------------------------|---------------------------------------|--------------------------------------------------------------------------|
|              | DTIA       | History of TIA or stroke | 65.3                               | 65            | 45                                   | Yes                                   | 82% of the participants using trial intervention at the end of the trial |

**Table S3.7- Efficacy outcomes of RCTs reported either long-term risk of CRC incidence or mortality**

| Author, year (reference)   | Study name | Study group                                       | Efficacy outcomes                                                                                    |                     | Remarks                                                                                                                                                                           |
|----------------------------|------------|---------------------------------------------------|------------------------------------------------------------------------------------------------------|---------------------|-----------------------------------------------------------------------------------------------------------------------------------------------------------------------------------|
|                            |            |                                                   | CRC incidence (n/N)                                                                                  | CRC mortality (n/N) |                                                                                                                                                                                   |
| Peto 1988<br>9,10,44,70    | BDAT       | Aspirin 300 or 500 mg/day (classified as ASA-HD)  | 92/3429 (all, including 20 years or more);<br>78/3429 (up to 19 years)                               | 59/3429             | <b>Follow-up for CRC mortality: 22-23 years.</b><br>Used 20 years or more follow-up data for NMA.                                                                                 |
|                            |            | Control                                           | 64/1710 (all, including 20 years or more);<br>55/1710 (up to 19 years)                               | 40/1710             |                                                                                                                                                                                   |
| Farrell 1991<br>9,10,45,70 | UK-TIA     | Aspirin 300 mg/day                                | 37/1632 (all, including 20 years or more);<br>33/1632 (up to 19 years)<br><i>Considered as ASAHD</i> | 8/811               | <b>CRC incidence:</b> not analysed separately for aspirin 300 mg and 1200 mg<br><b>Follow-up for CRC mortality:</b> 21-27 years.<br>Used 20 years or more follow-up data for NMA. |
|                            |            | Aspirin 1200 mg/day                               |                                                                                                      | 11/821              |                                                                                                                                                                                   |
|                            |            | Placebo                                           | 23/817 (all, including 20 years or more);<br>23/817 (up to 19 years)                                 | 16/817              |                                                                                                                                                                                   |
| Sturmer 1998<br>8,22,69    | PHS        | Aspirin 325 mg EOD                                | 173/11037                                                                                            | NA                  | Description provided in Appendix 2 (Table 2.4).                                                                                                                                   |
|                            |            | Placebo                                           | 168/11034                                                                                            | NA                  |                                                                                                                                                                                   |
| Virtamo 2003<br>3,51,71    | ATBC       | Vitamin E 50 mg/day                               | 76/7286                                                                                              | NA                  | Nil                                                                                                                                                                               |
|                            |            | Beta-carotene 20 mg/day                           | 99/7282                                                                                              | NA                  |                                                                                                                                                                                   |
|                            |            | Vitamin E 50 mg/day + Beta-carotene 20 mg/day     | 90/7278                                                                                              | NA                  |                                                                                                                                                                                   |
|                            |            | Placebo                                           | 75/7287                                                                                              | NA                  |                                                                                                                                                                                   |
| Goodman 2004<br>4,46,70,71 | CARET      | Vitamin A 25,000 IU/day + beta-carotene 30 mg/day | 127/9420                                                                                             | NA                  | We used the initial number of randomized participants to each trial arm.                                                                                                          |
|                            |            | Placebo                                           | 123/8894                                                                                             | NA                  |                                                                                                                                                                                   |
| Ebbing 2009<br>5,28,29     | NORVIT and | Folic acid 0.8 mg/day + vitamins B12 0.4          | 25/1708                                                                                              | 3/1708              | Combined analysis of 2 trials; follow-up is comparatively small (only 6.4 years) compared to other studies; analysis needs to be considered with caveats.                         |

| Author, year (reference)          | Study name | Study group                                                     | Efficacy outcomes   |                     | Remarks                                                             |
|-----------------------------------|------------|-----------------------------------------------------------------|---------------------|---------------------|---------------------------------------------------------------------|
|                                   |            |                                                                 | CRC incidence (n/N) | CRC mortality (n/N) |                                                                     |
|                                   | WENBIT     | mg/day+ vitamin B6 40 mg/day                                    |                     |                     | Description provided in Appendix 2 (Table 2.4).                     |
|                                   |            | Folic acid 0.8 mg/day + vitamin B12 0.4 mg/day                  | 22/1703             | 9/1703              |                                                                     |
|                                   |            | Vitamin B6 40 mg/day                                            | 26/1705             | 5/1705              |                                                                     |
|                                   |            | Placebo                                                         | 22/1721             | 7/1721              |                                                                     |
| Cook 2013 <sup>6,13</sup>         | WHS        | Aspirin 100 mg EOD                                              | 202/19934           | NA                  | Factorial arm data was not available                                |
|                                   |            | No aspirin (Vitamin E 600 IU EOD + Placebo)                     | 249/19942           | NA                  |                                                                     |
| Cauley 2013 <sup>7,58</sup>       | WHI        | Calcium 1000 mg/day (elemental calcium) + vitamin D3 400 IU/day | 256/18,176          | NA                  |                                                                     |
|                                   |            | Placebo                                                         | 267/18,106          | NA                  |                                                                     |
| Rothwell 2010 <sup>10,73-75</sup> | TPT        | Aspirin 75 mg/day                                               | NA                  | 34/2545             | Data included based on 'at-margins' analysis.                       |
|                                   |            | Placebo                                                         | NA                  | 55/2540             |                                                                     |
|                                   | SALT       | Aspirin 75 mg/day                                               | NA                  | 7/676               | Nil                                                                 |
|                                   |            | Placebo                                                         | NA                  | 10/684              |                                                                     |
|                                   | DTIA       | Aspirin 30 mg/day                                               | NA                  | 12/1555             | We used the initial number of randomized participants for analysis. |
|                                   |            | Aspirin 283 mg/day                                              | NA                  | 6/1576              |                                                                     |

All our analyses followed the intention-to-treat principle. We used the initial number of randomized participants to each trial arm and performed the analyses irrespective of how the authors of the original trials had analysed the data. Participants who were lost to follow-up were considered survivors, free of colorectal cancers. n/N: number of events/ number of randomized participants; EOD: every other day; NA: not available or not applicable; CV: cardiovascular; MI: myocardial infarction; IU: international unit; ADR: adverse events; CRC: colorectal cancer; GIB: gastro-intestinal bleeding; PU: peptic ulcer; BARC: Bleeding Academic Research Consortium

|  |
|--|
|  |
|--|

**Table S3.8- Risk of bias assessment (Revised Cochrane risk of bias tool for randomized trials (RoB 2.0) of RCTs reported either long-term risk of CRC incidence or mortality**

Elven studies (long-term observational follow-up of 12 RCTs) reported either CRC incidence or mortality during both trial and post-trial phase (defined as long-term risk) were included in our analysis. One report from Ebbing and colleagues<sup>5</sup> was a combined analysis and extended follow-up of participants from 2 RCTs (NORVIT<sup>28</sup> and WENBIT<sup>29</sup>). We followed Cochrane risk of bias tool to assess the risk of bias among these studies. Since our research objective is to look the long-term effect of chemopreventive agents (CPAs) on CRC after treatment period, we assessed the quality of all studies till trial phase for the following criteria: randomization; deviations from the intended intervention, con-interventions; adherence. However, other criteria such as missing outcome data, bias in measurement of the outcome and bias in selection of the reported result considered for the quality assessment of the whole study (including trial and post-trial phase).

| Author, year                      | Study             | A | B | C | D | E | F |
|-----------------------------------|-------------------|---|---|---|---|---|---|
| Peto 1988 <sup>9,10,44</sup>      | BDAT              | + | ? | + | + | + | + |
| Fareell 1991 <sup>9,45</sup>      | UK-TIA            | + | + | + | + | + | + |
| Sturmer 1998 <sup>8,22,69</sup>   | PHS               | + | + | + | + | + | + |
| Virtamo 2003 <sup>3,51,71</sup>   | ATBC              | + | + | + | + | + | + |
| Goodman 2004 <sup>4,46</sup>      | CARET             | + | + | + | + | + | + |
| Ebbing 2009 <sup>5,28,29</sup>    | NORVIT/<br>WENBIT | + | + | + | + | + | + |
| Cook 2013 <sup>6,13</sup>         | WHS               | + | + | + | + | + | + |
| Cauley 2013 <sup>7,58</sup>       | WHI               | + | + | + | + | + | + |
| Rothwell 2010 <sup>10,73-75</sup> | TPT               | + | + | + | + | + | + |
|                                   | SALT              | + | + | + | + | + | + |
|                                   | DTIA              | + | + | ? | + | + | + |

A-Bias arising from the randomization process; B- Bias due to deviations from intended interventions; C- Bias due to missing outcome data; D- Bias in measurement of the outcome; E-Bias in selection of the reported result; F-Overall bias.  
+symbol/green colour means 'low risk of bias'; symbol/yellow colour means 'some concerns'; - symbol/red colour means 'high risk of bias'

**BDAT:** A: low risk (Randomization-yes; allocation concealment: no information; baseline comparability: similar); B: some concerns (participants aware about blinding (open label) and there is no information on whether there were deviations from usual practice that were likely to impact on the outcome; no deviations from the intended intervention beyond what would be expected in usual practice (withdrawal of aspirin due to side effect); co-intervention: unclear; adherence (halfway through the study roughly 70% of doctors who had been allocated aspirin were still taking it on most days)); C: low risk; D: low risk; E: low risk; F: low risk.

**UK-TIA:** A: low risk (Randomization-yes, method not clear; allocation concealment: yes; baseline comparability: similar); B: low risk (participants were blinded; no deviations from the intended intervention beyond what would be expected in usual practice; co-intervention: unclear; adherence reported); C: low risk; D: low risk; E: low risk; F: low risk. .

**PHS:** A: low risk (Randomization-yes, computer generated; allocation concealment: yes; baseline comparability: similar); B: low risk (participants were blinded; no deviations from the intended intervention beyond what would be expected in usual practice; half of the participants received beta-carotene (no results available for separate factorial arms (refer appendix 2), however, beta-carotene use were balanced; adherence reported); C: low risk; D: low risk; E: low risk; F: low risk.

**ATBC:** A: low risk (Block randomization, allocation concealment: unclear; baseline comparability: similar); B: low risk (participants were blinded; no deviations from the intended intervention beyond what would be expected in usual practice; co-interventions: not reported, adherence reported); C: low risk (all included in the analysis); D: low risk; E: low risk; F: low risk.

**CARET:** A: low risk (Permuted block randomization design, allocation concealment: yes; baseline comparability: similar); B: low risk (participants were blinded; no deviations from the intended

intervention beyond what would be expected in usual practice; co-interventions: not reported, adherence: reported); C: low risk; D: low risk; E: low risk; F: low risk.

**NORVIT/WENBIT:** Both trials were used same design (PICO-similar); A: low risk (block randomization design, allocation concealment: yes; baseline comparability: similar for the combined analysis); B: low risk (participants were blinded; no deviations from the intended intervention beyond what would be expected in usual practice; co-interventions: yes, adherence: reported); C: low risk; D: low risk; E: low risk; F: low risk.

**WHS:** A: low risk (block randomization design, allocation concealment: yes; baseline comparability: similar); B: low risk (participants were blinded; no deviations from the intended intervention beyond what would be expected in usual practice; co-interventions: 50% received vitamin E for 10 years and 50% received beta-carotene for 2 years, but balanced between groups, adherence: reported); C: low risk; D: low risk; E: low risk; F: low risk.

**WHI:** A: low risk (randomization computer generated, allocation concealment: yes; baseline comparability: similar); B: low risk (participants were blinded; no deviations from the intended intervention beyond what would be expected in usual practice; co-interventions: not reported, adherence: reported); C: low risk; D: low risk; E: low risk; F: low risk.

**TPT:** A: low risk (randomization computer generated, allocation concealment: yes; baseline comparability: similar); B: low risk (participants were blinded; no deviations from the intended intervention beyond what would be expected in usual practice; co-interventions: not reported, 50% received warfarin-balanced between groups, adherence: reported); C: low risk (all included in the analysis); D: low risk; E: low risk; F: low risk.

**SALT:** A: low risk (block randomization, randomisation code, allocation concealment: yes; baseline comparability: similar); B: low risk (participants were blinded; no deviations from the intended intervention beyond what would be expected in usual practice; co-interventions: similar, adherence: reported); C: low risk (all included in the analysis); D: low risk; E: low risk; F: low risk.

**DTIA:** A: low risk (permuted block randomization/randomization code by telephone, allocation concealment: unclear; baseline comparability: similar); B: low risk (participants were blinded; no deviations from the intended intervention beyond what would be expected in usual practice; co-interventions: similar, adherence: reported); C: some concerns (684 of 3131 (22%) participants with unknown vital status; excluded from post-trial analysis; reasons for missing data among both groups not reported); D: low risk; E: low risk; F: low risk.



### Table S3.9 Search strategy for safety outcomes

Objective of our network meta-analysis is to compare the relative efficacy and safety of competing CPAs (chemopreventive agents with evidence of efficacy, i.e. aspirin at different doses) on colorectal cancer incidence and mortality in persons at average risk. To appreciate the balance of benefits from CRC mortality prevention and CV benefits with other risks of aspirin at different doses (interventions with evidence of efficacy), we performed net clinical benefit analysis. Net clinical benefit analysis (NBA) is to demonstrate the benefit of aspirin therapy in reducing long-term CRC mortality and CV benefits (i.e. CV mortality) when subtracted by the additional risk of adverse outcomes, such as major GI bleeding events. However, there are an insufficient number of safety outcomes reported from the 5 RCTs of aspirin on long-term CRC mortality in average risk individuals; hence, disallowing us to test the comparative evaluation of requisite safety outcomes among aspirin at different doses.

To tackle this, we identified all RCTs (based on below mentioned criteria) on aspirin in average risk individuals for CRC reported in a recent systematic review by USPSTF<sup>20</sup> and extracted the requisite safety data.

**Definition:** Safety outcomes of interest were major gastrointestinal (GI) bleeding events, defined as events requiring hospitalization, transfusion, leading to death, or defined as fatal or major by the study investigators and cardiovascular (CV) mortality, defined as deaths due to any CV complications including myocardial infarction (MI), stroke (ischemic and haemorrhagic) or defined as CV deaths (excluding deaths due to GI events) by the study investigators.

#### Data source for safety outcomes:

We identified following recent high-quality systematic reviews on aspirin to support the U.S. Preventive Services Task Force (USPSTF) in making evidence-based recommendations about the use of aspirin for primary prevention in adults and to understand the risks of regular aspirin use. Both reviews used an extensive search strategy to identify all RCTs on aspirin till 2014 June.

- 1) Aspirin Use in Adults: Cancer, All-Cause Mortality, and Harms: A Systematic Evidence Review for the U.S. Preventive Services Task Force, 2015.<sup>20</sup>
- 2) Aspirin for the Primary Prevention of Cardiovascular Events: A Systematic Evidence Review for the U.S. Preventive Services Task Force, 2016.<sup>30</sup>

Data sources of the systematic reviews: PubMed, MEDLINE, and the Cochrane Central Register of Controlled Trials (Search till 2014 June).

#### Selection criteria used in the systematic review

##### Inclusion criteria:

- Included only fair- and good-quality RCTs using criteria defined by the USPSTF<sup>76</sup>.
- Included all primary and secondary CVD prevention trials conducted in individuals at average risk for colorectal cancer

##### Exclusion criteria:

- Poor quality
- Population at increased risk for colorectal cancer
- Non-English
- Primary or secondary prevention of CVD with no relevant outcomes
- Exposure to aspirin < 1 year
- 20% adults aged < 40 years at BL or mean age < 40 years

- Wrong ASA dosage

[These criteria are taken from the latest systematic review by Whitlock et al. for USPTF <sup>20</sup>]

Search results of systematic review by Whitlock et al.: After screening 4,393 abstracts and 336 full-text articles, 30 RCTs were included as per the inclusion criteria <sup>20</sup>.

**Additional search:** We also conducted an additional search in PubMed till 2017 using following search terms "Aspirin"[Mesh] AND "Cardiovascular Diseases"[Mesh] AND (Randomized Controlled Trial[ptyp] AND ("2014/07/01"[PDAT] : "2017/12/31"[PDAT])).

| Search strategy for updated search in PubMed |                                                                                                     | Items   |
|----------------------------------------------|-----------------------------------------------------------------------------------------------------|---------|
| 1                                            | Aspirin [Mesh]                                                                                      | 41693   |
| 2                                            | Cardiovascular Diseases [Mesh]                                                                      | 2143866 |
| 3                                            | 1 AND 2                                                                                             | 16674   |
| 4                                            | Limit 3 to (Randomized Controlled Trial[ptyp], humans and "2014/07/01"[PDAT] : "2017/12/31"[PDAT])) | 247     |

**Figure S3.1- Literature search diagram for safety outcomes (CV mortality and major GI bleeding events)**

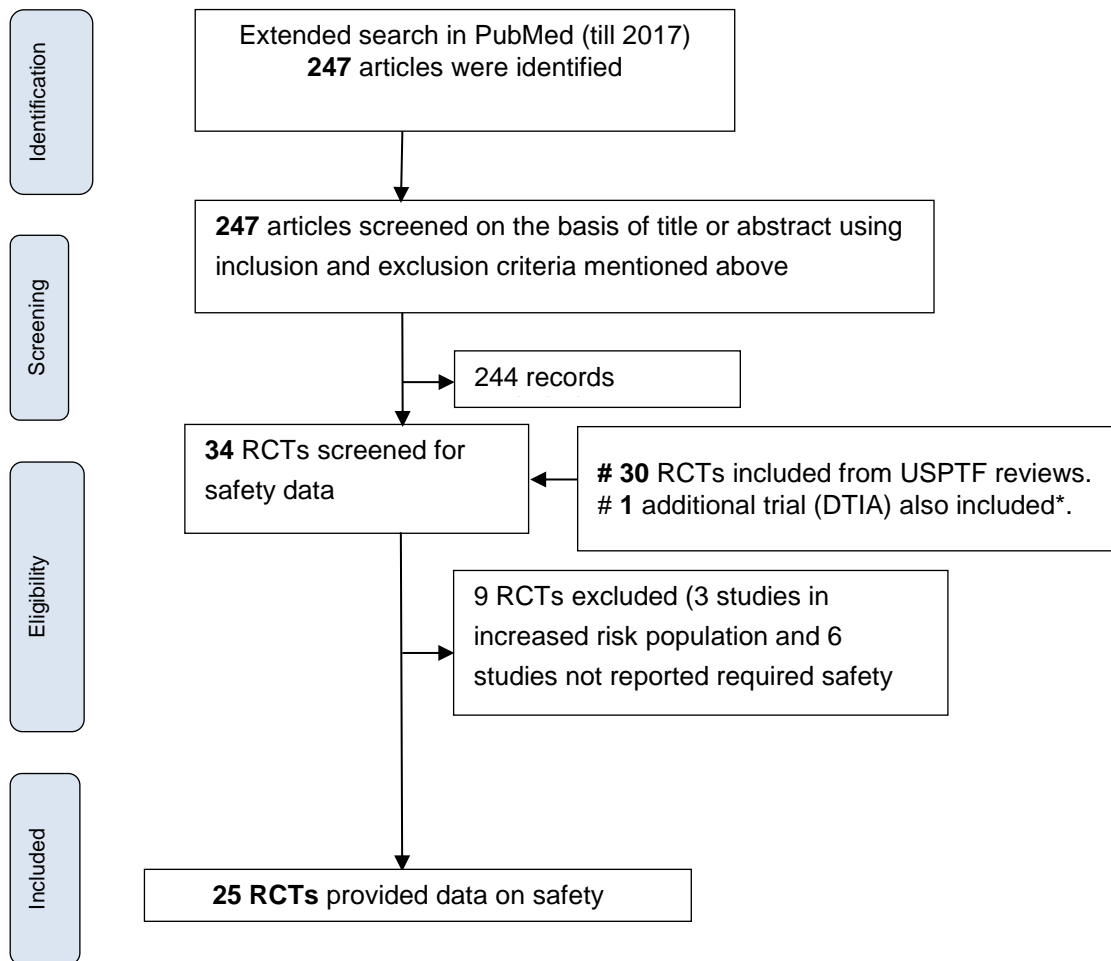

\*Data from an additional trial (DTIA) [57] (a trial testing different doses of aspirin without control), which reported long-term CRC mortality, was also included. Which is not previously reported in USPTF review.

Table S3.10 Characteristics of RCTs on aspirin reported safety outcomes

| Author, study (reference)            | Population (Mean age in years); current smokers in %                                  | Mean follow-up in years | Interventions | Safety outcomes                                      |                                                                                                                                 |                                                                                                   | Dose of aspirin | Co-interventions                       |
|--------------------------------------|---------------------------------------------------------------------------------------|-------------------------|---------------|------------------------------------------------------|---------------------------------------------------------------------------------------------------------------------------------|---------------------------------------------------------------------------------------------------|-----------------|----------------------------------------|
|                                      |                                                                                       |                         |               | 1. CV mortality (excludes deaths due to GI bleeding) | 2. GI bleeding events (required transfusion, hospitalization, leading to death, or defined as major by the study investigators) | Definitions of 1) CV mortality and 2) GI bleeding events                                          |                 |                                        |
| <b>CVD primary prevention trials</b> |                                                                                       |                         |               |                                                      |                                                                                                                                 |                                                                                                   |                 |                                        |
| Belch, 2008 (POPADAD) <sup>77</sup>  | Male and female with DM and ABI ≤ 0.99 (60.3)<br>Smoking 31.1%                        | 6.7                     | ASA-VLD       | 43/638                                               | NA                                                                                                                              | 1. Death from coronary heart disease or stroke<br>2. GI bleeding events reported, but not defined | 100 mg qd       | Antioxidants (factorial)               |
|                                      |                                                                                       |                         | Placebo       | 35/638                                               |                                                                                                                                 |                                                                                                   |                 |                                        |
| Cook, 2005 (WHS) <sup>13,78</sup>    | Postmenopausal women (55)<br>Smoking 13.1%                                            | 10.1                    | ASA-VLD       | 120/19934                                            | 129/19934                                                                                                                       | 1. Death from CV causes<br>2. GI bleeding events required transfusion                             | 100 mg qod      | Vitamin E or beta-carotene (factorial) |
|                                      |                                                                                       |                         | Placebo       | 126/19942                                            | 94/19942                                                                                                                        |                                                                                                   |                 |                                        |
| de Gaetano, 2001 (PPP) <sup>79</sup> | Males and females with ≥ 1 CVD risk factor (64.4)<br>Smoking 14.8%                    | 3.6                     | ASA-VLD       | 17/2226                                              | NA                                                                                                                              | 1. Death from CV causes<br>2. GI bleeding events reported, but not defined                        | 100 mg qd       | Vitamin E (factorial)                  |
|                                      |                                                                                       |                         | Placebo       | 31/2269                                              |                                                                                                                                 |                                                                                                   |                 |                                        |
| ETDRS, 1992 <sup>80</sup>            | Males and females with diabetes and diabetic retinopathy (range 18-70)<br>Smoking: NA | 5                       | ASA-HD        | 244/1856                                             | NA                                                                                                                              | 1. Death from CV causes<br>2. NA                                                                  | 650 mg qd       | Nil                                    |
|                                      |                                                                                       |                         | Placebo       | 275/1855                                             |                                                                                                                                 |                                                                                                   |                 |                                        |
| Fowkes, 2010 (AAA) <sup>81</sup>     | Males and females with low ankle brachial index ≤ 0.95 (62)<br>Smoking 32.4%          | 8.2                     | ASA-VLD       | NA                                                   | 9/1675                                                                                                                          | 1. NA<br>2. Required admission to hospital to control bleeding.                                   | 100 mg qd       | Nil                                    |
|                                      |                                                                                       |                         | Placebo       | NA                                                   | 8/1675                                                                                                                          |                                                                                                   |                 |                                        |

| Author, study (reference)         | Population (Mean age in years); current smokers in %        | Mean follow-up in years | Interventions | Safety outcomes                                      |                                                                                                                                 |                                                                                                                                                                                                 | Dose of aspirin                   | Co-interventions          |
|-----------------------------------|-------------------------------------------------------------|-------------------------|---------------|------------------------------------------------------|---------------------------------------------------------------------------------------------------------------------------------|-------------------------------------------------------------------------------------------------------------------------------------------------------------------------------------------------|-----------------------------------|---------------------------|
|                                   |                                                             |                         |               | 1. CV mortality (excludes deaths due to GI bleeding) | 2. GI bleeding events (required transfusion, hospitalization, leading to death, or defined as major by the study investigators) | Definitions of 1) CV mortality and 2) GI bleeding events                                                                                                                                        |                                   |                           |
| Hansson, 1998 (HOT) <sup>82</sup> | Males and females with hypertension (61.5)<br>Smoking 15.9% | 3.8                     | ASA-VLD       | 133/9399                                             | 5/9399                                                                                                                          | 1. CV mortality<br>2. Fatal GI bleeding (excluded non-fatal major bleeding events)                                                                                                              | 75 mg qd                          | Nil                       |
|                                   |                                                             |                         | Placebo       | 140/9391                                             | 3/9391                                                                                                                          |                                                                                                                                                                                                 |                                   |                           |
| MRC, 1998 (TPT) <sup>74</sup>     | Males at high-risk for IHD (57.5)<br>Smoking 14.3%          | Median 6.8              | ASA-VLD       | 101/2545                                             | 14/2545                                                                                                                         | 1. Deaths due to IHD, stroke and other cardiovascular disease<br>2. Major GI bleeding (excluded cases due to gastric cancer)                                                                    | 75 mg qd                          | Warfarin (factorial)      |
|                                   |                                                             |                         | Placebo       | 81/2540                                              | 10/2540                                                                                                                         |                                                                                                                                                                                                 |                                   |                           |
| Ogawa, 2008 (JPAD) <sup>83</sup>  | Males and females with diabetes (64.5)<br>Smoking 21.2%     | Median 4.37             | ASA-VLD       | 1/1262                                               | 4/1263                                                                                                                          | 1. Coronary and cerebrovascular mortality<br>2. Severe gastrointestinal bleeding required transfusion (Data from U.S. Preventive Services Task Force review)                                    | 81 or 100 mg qd                   | Nil                       |
|                                   |                                                             |                         | Placebo       | 10/1277                                              | 0/1278                                                                                                                          |                                                                                                                                                                                                 |                                   |                           |
| Peto, 1988 (BMD) <sup>44</sup>    | Male physicians (62)<br>Smoking 12.9%                       | 6                       | ASA-HD        | 143/3429                                             | NA                                                                                                                              | 1. MI, stroke and other vascular and related causes (excluding deaths associated with gastric haemorrhage and peptic ulcers).<br>2. Data taken from U.S. Preventive Services Task Force review. | 500 mg, or 300 mg if requested qd | Nil                       |
|                                   |                                                             |                         | Placebo       | 75/1710                                              |                                                                                                                                 |                                                                                                                                                                                                 |                                   |                           |
| PHS, 1989 <sup>69</sup>           | Male physicians (53.2)<br>Smoking 11%                       | 5                       | ASA-LD        | 258/11037                                            | 49/11037                                                                                                                        | 1. CV causes, which include IHD, MI and stroke<br>2. Data from U.S. Preventive                                                                                                                  | 325 mg qod                        | Beta-carotene (factorial) |
|                                   |                                                             |                         | Placebo       | 337/11034                                            | 28/11034                                                                                                                        |                                                                                                                                                                                                 |                                   |                           |
|                                   |                                                             |                         | Placebo       |                                                      |                                                                                                                                 |                                                                                                                                                                                                 |                                   |                           |

| Author, study (reference)              | Population (Mean age in years); current smokers in %            | Mean follow-up in years | Interventions                | Safety outcomes                                      |                                                                                                                                 |                                                                                                                                                                                                | Dose of aspirin                   | Co-interventions |
|----------------------------------------|-----------------------------------------------------------------|-------------------------|------------------------------|------------------------------------------------------|---------------------------------------------------------------------------------------------------------------------------------|------------------------------------------------------------------------------------------------------------------------------------------------------------------------------------------------|-----------------------------------|------------------|
|                                        |                                                                 |                         |                              | 1. CV mortality (excludes deaths due to GI bleeding) | 2. GI bleeding events (required transfusion, hospitalization, leading to death, or defined as major by the study investigators) | Definitions of 1) CV mortality and 2) GI bleeding events                                                                                                                                       |                                   |                  |
|                                        |                                                                 |                         |                              |                                                      |                                                                                                                                 | Services Task Force review.                                                                                                                                                                    |                                   |                  |
| Silagy, 1993 <sup>84</sup>             | Males and females aged ≥ 70 years (73)<br>Smoking: 5.8%         | 1                       | ASA-VLD<br>Placebo           | NA                                                   | 1/201<br>0/201                                                                                                                  | 1. NA<br>2. Bleeding required hospital admission, for surgery and transfusion (Data from U.S. Preventive Services Task Force review)                                                           | 100 mg qd                         | Nil              |
| <b>CVD secondary prevention trials</b> |                                                                 |                         |                              |                                                      |                                                                                                                                 |                                                                                                                                                                                                |                                   |                  |
| AMIS, 1980 <sup>85</sup>               | Males and females with prior MI (54.8)<br>Smoking: 27.3%        | 3.2                     | ASA-HD<br>Placebo<br>Placebo | 211/2267<br>196/2257                                 | 1/2268<br>0/2258                                                                                                                | 1. Coronary deaths and deaths due to Non-atherosclerotic cardiovascular disease<br>2. Blood transfusion required during hospitalization (Data from U.S. Preventive Services Task Force review) | 0.5 g (1.0 g total per day) bid   | Nil              |
| Brighton, 2012 (ASPIRE) <sup>86</sup>  | Males and females with prior DVT or PE (54.5)<br>Smoking: NA    | Median 3.1              | ASA-VLD<br>Placebo           | 4/411<br>8/411                                       | NA                                                                                                                              | 1. deaths from pulmonary embolism, MI and other CV causes<br>2. GI bleeding not reported                                                                                                       | 100 mg qd                         | Nil              |
| CDPRG, 1980 (CDPA) <sup>87</sup>       | Males with prior MI (≥55; mean age not reported)<br>Smoking: NA | 1.83                    | ASA-HD<br>Placebo            | 41/758<br>60/771                                     | NA                                                                                                                              | 1. deaths from all CV causes<br>2. NA                                                                                                                                                          | 324 mg (972 mg total per day) tid | Nil              |
| Cote, 1995 (ACBS) <sup>88</sup>        | Males and females with an audible cervical bruit (66.7)         | 2.4                     | ASA-LD<br>Placebo            | 10/188<br>7/184                                      | 1/188<br>1/184                                                                                                                  | 1. Death from vascular causes (stroke, MI etc.)<br>2. GI bleeding required                                                                                                                     | 325 mg qd                         | Nil              |

| Author, study (reference)            | Population (Mean age in years); current smokers in %              | Mean follow-up in years | Interventions               | Safety outcomes                                      |                                                                                                                                 |                                                                                                                                                                                                                                                                            | Dose of aspirin                                                            | Co-interventions         |
|--------------------------------------|-------------------------------------------------------------------|-------------------------|-----------------------------|------------------------------------------------------|---------------------------------------------------------------------------------------------------------------------------------|----------------------------------------------------------------------------------------------------------------------------------------------------------------------------------------------------------------------------------------------------------------------------|----------------------------------------------------------------------------|--------------------------|
|                                      |                                                                   |                         |                             | 1. CV mortality (excludes deaths due to GI bleeding) | 2. GI bleeding events (required transfusion, hospitalization, leading to death, or defined as major by the study investigators) | Definitions of 1) CV mortality and 2) GI bleeding events                                                                                                                                                                                                                   |                                                                            |                          |
|                                      | Smoking: 36.8%                                                    |                         |                             |                                                      |                                                                                                                                 | hospitalization/transfusion                                                                                                                                                                                                                                                |                                                                            |                          |
| Diener, 1997 (ESPS-2) <sup>89</sup>  | Males and females w/ prior TIA or stroke (66.7)<br>Smoking: 23.5% | 2                       | ASA-VLD<br>Placebo          | 162/3299<br>180/3303                                 | NA                                                                                                                              | 1. Deaths from CVA, MI, cardiac failure, vascular events(excluded bleeding)<br>2. NA                                                                                                                                                                                       | 25 mg (50 mg total per day) bid                                            | Dipyridamole (factorial) |
| EAFT, 1993 <sup>90</sup>             | Males and females w/ prior TIA or stroke (73)<br>Smoking: 19.1%   | 2.3                     | ASA-LD<br>Placebo           | 77/404<br>77/378                                     | 2/404<br>1/378                                                                                                                  | 1. Vascular deaths due to cerebral, cardiac and other causes (embolism, peripheral vascular disease and other undefined causes). Excluded deaths due to non-cerebral bleeding.<br>2. GI bleeding events requiring hospital admission with blood transfusion and/or surgery | 300 mg qd                                                                  | Nil                      |
| Farrell, 1991 (UK-TIA) <sup>45</sup> | Males and females with prior TIA or stroke (60)<br>Smoking: 53.1% | 4                       | ASA-HD<br>ASA-LD<br>Placebo | 82/821<br>80/811<br>76/817                           | 19/821<br>10/811<br>2/817                                                                                                       | 1. Vascular deaths due to cerebrovascular, cardiovascular, other vascular and unknown causes. Excluded deaths due to GI bleeding.<br>2. GI bleeding events requiring hospital admission,                                                                                   | 150 mg (2 tablets; 300 mg total per day) bid or 300 mg (2 tablets; 1200 mg | Nil                      |

| Author, study (reference)                        | Population (Mean age in years); current smokers in %    | Mean follow-up in years | Interventions | Safety outcomes                                      |                                                                                                                                 |                                                                                                                                                                                                                                                    | Dose of aspirin                   | Co-interventions |
|--------------------------------------------------|---------------------------------------------------------|-------------------------|---------------|------------------------------------------------------|---------------------------------------------------------------------------------------------------------------------------------|----------------------------------------------------------------------------------------------------------------------------------------------------------------------------------------------------------------------------------------------------|-----------------------------------|------------------|
|                                                  |                                                         |                         |               | 1. CV mortality (excludes deaths due to GI bleeding) | 2. GI bleeding events (required transfusion, hospitalization, leading to death, or defined as major by the study investigators) | Definitions of 1) CV mortality and 2) GI bleeding events                                                                                                                                                                                           |                                   |                  |
|                                                  |                                                         |                         |               |                                                      |                                                                                                                                 | transfusion and surgery and defined as fatal.                                                                                                                                                                                                      | total per day) bid                |                  |
| Juil-Moller, 1992 (SAPAT) <sup>91</sup>          | Males and females with stable angina (67) Smoking: 16%  | 4.2                     | ASA-VLD       | 49/1009                                              | 11/1009                                                                                                                         | 1. Vascular deaths as fatal vascular events (since the trail reported 2 fatal GI bleeding events in aspirin group and 1 in placebo group, we excluded these events from CV mortality)<br>2. Major GI bleeding required transfusion or caused death | 75 mg qd                          | Sotalol          |
|                                                  |                                                         |                         | Placebo       | 69/1026                                              | 6/1026                                                                                                                          |                                                                                                                                                                                                                                                    |                                   |                  |
| PARIS, 1980 <sup>92</sup>                        | Males and females with prior MI (56.3) Smoking: 26.8%   | 3.4                     | ASA-HD        | 74/810                                               | NA                                                                                                                              | 1. All CV deaths (CV events defined as recurrent MI, angina pectoris (AP), congestive heart failure (CHF), stroke, pulmonary embolism and cardiovascular surgery)<br>2. NA                                                                         | 324 mg (972 mg total per day) tid | Nil              |
|                                                  |                                                         |                         | Placebo       | 45/406                                               |                                                                                                                                 |                                                                                                                                                                                                                                                    |                                   |                  |
| Petersen, 1989 (Copenhagen AFASAK) <sup>93</sup> | Males and females with chronic AF (74.9) Smoking: 35.9% | 2                       | ASA-VLD       | 12/336                                               | 1/337                                                                                                                           | 1. Vascular deaths (both cerebrovascular and cardiovascular)<br>2. GI bleeding event required transfusion. There were no bleeding episodes in the                                                                                                  | 75 mg qd                          | Nil              |
|                                                  |                                                         |                         | Placebo       | 15/336                                               | 0/337                                                                                                                           |                                                                                                                                                                                                                                                    |                                   |                  |



| Author, study (reference)        | Population (Mean age in years); current smokers in %              | Mean follow-up in years | Interventions      | Safety outcomes                                      |                                                                                                                                 |                                                                                                                             | Dose of aspirin                            | Co-interventions |
|----------------------------------|-------------------------------------------------------------------|-------------------------|--------------------|------------------------------------------------------|---------------------------------------------------------------------------------------------------------------------------------|-----------------------------------------------------------------------------------------------------------------------------|--------------------------------------------|------------------|
|                                  |                                                                   |                         |                    | 1. CV mortality (excludes deaths due to GI bleeding) | 2. GI bleeding events (required transfusion, hospitalization, leading to death, or defined as major by the study investigators) | Definitions of 1) CV mortality and 2) GI bleeding events                                                                    |                                            |                  |
|                                  |                                                                   |                         |                    |                                                      |                                                                                                                                 | placebo group. Hence, we used the same method presented by U.S. Preventive Services Task Force review to handle zero event. |                                            |                  |
| SALT, 1991 <sup>73</sup>         | Males and females with prior TIA or stroke (67)<br>Smoking: 25.4% | 2.7                     | ASA-VLD<br>Placebo | NA                                                   | 9/676<br>4/684                                                                                                                  | 1. only non-stroke deaths were reported<br>2. Data from U.S. Preventive Services Task Force review                          | 75 mg qd                                   | Nil              |
| Sato, 2006 (JAST) <sup>94</sup>  | Males and females with AF (65.1)<br>Smoking: 30.4%                | 2.1                     | ASA-LD<br>Placebo  | 3/426<br>3/445                                       | NA                                                                                                                              | 1. CV deaths<br>2. NA                                                                                                       | 150-200 mg qd (or qod if 330 mg preferred) | Nil              |
| SPAF, 1991 <sup>95</sup>         | Males and females with AF (67)<br>Smoking: 16%                    | 1.3                     | ASA-LD<br>Placebo  | 18/552<br>19/568                                     | NA                                                                                                                              | 1. Vascular deaths due to myocardial infarction, congestive heart failure, arrhythmia, stroke, pulmonary embolism)<br>2. NA | 325 mg qd                                  | Nil              |
| <b>Additional trial included</b> |                                                                   |                         |                    |                                                      |                                                                                                                                 |                                                                                                                             |                                            |                  |
| DTIA <sup>75</sup>               | History of TIA or stroke (65.3)<br>Smoking: 44.5%                 | 2.6                     | ASA-VLD<br>ASA-LD  | 105/1555<br>107/1576                                 | 2/1555<br>2/1576                                                                                                                | 1. Deaths from vascular causes<br>2. Fatal gastrointestinal bleeding                                                        | 30 mg qd and 283 mg qd                     | Nil              |

**Table S3.11 RCTs reported efficacy and safety outcomes of any anti-oxidants**

| Author, year                                     | Study name       | Population                                                           | N randomized | Mean age (years)   | Male % | Interventions | Antioxidants used with dose and frequency (n= randomized participants)            | Mean intended treatment duration (years) | Mean follow-up (years) | Efficacy outcomes (n/N)         | Safety outcomes with definition (n/N)<br>As per protocol safety outcomes are bleeding or CV events. If not available, we presented reported safety outcomes in the study |
|--------------------------------------------------|------------------|----------------------------------------------------------------------|--------------|--------------------|--------|---------------|-----------------------------------------------------------------------------------|------------------------------------------|------------------------|---------------------------------|--------------------------------------------------------------------------------------------------------------------------------------------------------------------------|
| <b>Early risk of colorectal cancer incidence</b> |                  |                                                                      |              |                    |        |               |                                                                                   |                                          |                        |                                 |                                                                                                                                                                          |
| Gann 1993/<br>Hennekens 1996                     | PHS <sup>a</sup> | Male physicians                                                      | 22071        | 53                 | 0      | AOs; PLB      | Beta-carotene 50 mg EOD (n=11036)                                                 | 12                                       | 12                     | AO:167/11036<br>PLB: 174/11035  | Death from any cause:<br>AO: 979/11036<br>PLB: 968/11035                                                                                                                 |
| Omenn 1996                                       | CARE T           | Cigarette smokers, former smokers, and workers exposed to asbestos   | 18314        | 57                 | 66     | AOs; PLB      | Vitamin A 25,000 IU/day + beta-carotene 30 mg/day (n = 9420)                      | 4                                        | 4                      | AO: 56/9420<br>PLB: 36/8894     | NA                                                                                                                                                                       |
| HPS group 2002                                   | HPS              | History of coronary and other occlusive arterial disease or diabetes | 20536        | 40-80 <sup>b</sup> | 75     | AOs; PLB      | Vitamin C 250 mg/day + vitamin E 600 mg/day + beta-carotene 20 mg/day (n = 10269) | 5                                        | 5                      | AO: 117/10269<br>PLB: 140/10267 | Vascular death:<br>AO: 878/10269<br>PLB: 840/10267<br>Death from any cause:<br>AO: 1446/10269<br>PLB: 1389/10267                                                         |
| Duffield-Lillico 2002                            | NPCT             | History of non-melanoma skin cancer                                  | 1312         | 63                 | 75     | AOs; PLB      | Selenium 200 microgram/day (n=653)                                                | 4.5                                      | 7.4                    | AO: 9/653<br>PLB: 19/659        | Death from any cause:<br>AO: 108/653<br>PLB: 129/659                                                                                                                     |
| Virtamo 2003                                     | ATBC             | Male cigarette smokers                                               | 29133        | 57                 | 100    | AOs; PLB      | Vitamin E 50 mg/day (n=7286); Beta-carotene 20 mg/day                             | 6.1                                      | 6.1                    | VE: 29/7286<br>BC: 39/7282      | NA                                                                                                                                                                       |

|                         |                     |                                                        |                          |    |    |                                      |                                                                                                                                                                           |                  |                  |                                                         |                                                                                                                                                                 |
|-------------------------|---------------------|--------------------------------------------------------|--------------------------|----|----|--------------------------------------|---------------------------------------------------------------------------------------------------------------------------------------------------------------------------|------------------|------------------|---------------------------------------------------------|-----------------------------------------------------------------------------------------------------------------------------------------------------------------|
|                         |                     |                                                        |                          |    |    |                                      | (n=7282);<br>Vitamin E 50 mg/day + Beta-carotene 20 mg/day (n=7278)                                                                                                       |                  |                  | VE+BC:<br>30/7278<br>PLB:<br>37/7287                    |                                                                                                                                                                 |
| Zhu 2003                | NA                  | History of atrophic gastritis                          | 216                      | 56 | 63 | FA+B12;<br>AOs; PLB                  | Beta-carotene (natural), 30 mg/day for 1 year then 30 mg twice/week for 1 year) (n = 61);<br>Beta-carotene (synthetic), administered as in natural beta-carotene (n = 57) | 2                | 6                | BC (natural and synthetic):<br>0/118<br>PLB: 1/54       | NA                                                                                                                                                              |
| Hercberg 2004           | SU.VI.<br>MAX       | General population                                     | 13017                    | 49 | 39 | AOs; PLB                             | Vitamin C 120 mg/day + vitamin E 30 mg/day + beta-carotene 96 mg/day + selenium 100 microgram/day + zinc 20 mg/day (n = 6481)                                             | 7.5              | 7.5              | AO: 21/6481<br>PLB: 24/6536                             | Death from any cause:<br>AO: 76/6481<br>PLB: 98/6536                                                                                                            |
| Lonn 2005/<br>Lonn 2006 | HOPE <sup>a</sup>   | History of CV diseases or diabetes                     | 9541                     | 66 | 73 | AOs; PLB                             | Vitamin E 400 IU/day (n = 4761)                                                                                                                                           | 4.5              | 4.5              | AO: 69/4761<br>PLB: 57/4780                             | Death from any cause:<br>AO: 799/4761<br>PLB: 801/4780                                                                                                          |
| Cook 2005               | WHS <sup>a</sup>    | Female health professionals                            | 39 876                   | 55 | 0  | ASA-VLD;<br>AOs; ASA-VLD+AOs;<br>PLB | Vitamin E 600 IU EOD (n=9,971); Vitamin E 600 IU EOD and aspirin 100 mg EOD (n=9966)                                                                                      | 10.1             | 10.1             | AO: 69/9968<br>AO+ASA: 75/9966<br>PLB: 82/9,71          | Any GI bleeding events (not defined)<br>AO: 662/9971<br>AO+ASA: 754/9966<br>PLB: 638/9971<br>Peptic ulcer:<br>AO: 462/9966<br>AO+ASA: 553/9966<br>PLB: 469/9971 |
| Lin 2009                | WACS <sup>a</sup>   | Female health professionals at high risk of CV disease | 8171 (2729) <sup>d</sup> | 60 | 0  | AOs; PLB                             | Vitamin C 500 mg/day + vitamin E 600 IU EOD + beta-carotene 50 mg EOD (n=7149)                                                                                            | 8 <sup>d</sup>   | 8 <sup>d</sup>   | AO: 5/2394<br>PLB: 2/335 (ITT data provided by authors) | Death from any cause: (follow-up 2years only)<br>AO: 871/7149<br>PLB: 124/1022                                                                                  |
| Zhang 2008              | WAFACS <sup>a</sup> | Female health professionals at                         | 5442 <sup>d</sup>        | 63 | 0  | AOs; FAVB;<br>FAVB+ AOs;             | Vitamin C 500 mg/day + vitamin E 600 IU EOD + beta-carotene                                                                                                               | 6.8 <sup>d</sup> | 6.8 <sup>d</sup> | AO: 20/2376<br>FA+AO:                                   | NA                                                                                                                                                              |

|              |         |                               |       |                   |     |          |                                                                                                               |     |     |                                                                   |                                                                                               |
|--------------|---------|-------------------------------|-------|-------------------|-----|----------|---------------------------------------------------------------------------------------------------------------|-----|-----|-------------------------------------------------------------------|-----------------------------------------------------------------------------------------------|
|              |         | high risk of CV disease       |       |                   |     | PLB      | 50 mg EOD) (n= 2376)                                                                                          |     |     | 16/2379<br>PLB: 2/345<br>(ITT data provided by authors)           |                                                                                               |
| Lippman 2009 | SELE CT | General population (men only) | 35533 | 62-6 <sup>c</sup> | 100 | AOs; PLB | Selenium 200 microgram/day (n = 8910);<br>vitamin E 400 IU/day (n = 8904);<br>selenium + vitamin E (n = 8863) | 5.5 | 5.5 | Seli.: 63/8910<br>VE: 63/8910<br>Seli+VE: 77/8863<br>PLB: 60/8856 | Death from any cause: Seli.: 378/8910<br>VE: 358 /8904<br>Seli+VE: 359 /8863<br>PLB: 382/8856 |
| Gaziano 2009 | PHS II  | Male physicians               | 14641 | 64                | 100 | AOs; PLB | Vitamin C 500 mg/day, vitamin E 400 IU EOD, beta-carotene (terminated early) with multivitamins (n=13619)     | 8   | 8   | AO: 152/13619<br>PLB: 43/13619                                    | NA                                                                                            |

**Long-term risk of colorectal cancer incidence**

|              |        |                                                                    |       |      |     |          |                                                                                                                              |     |    |                                              |                                                                          |
|--------------|--------|--------------------------------------------------------------------|-------|------|-----|----------|------------------------------------------------------------------------------------------------------------------------------|-----|----|----------------------------------------------|--------------------------------------------------------------------------|
| Virtamo 2003 | ATBC   | Male cigarette smokers                                             | 29133 | 57.2 | 100 | AOs; PLB | Vitamin E 50 mg/day (n=7286);<br>Beta-carotene 20 mg/day (n=7282);<br>Vitamin E 50 mg/day + Beta-carotene 20 mg/day (n=7278) | 6.1 | 12 | VE: 76/7286<br>BC: 99/7282<br>VE+BC: 90/7278 | Death from any cause: VE: 2671/7286<br>BC: 2793/7282<br>VE+BC: 2762/7278 |
| Goodman 2004 | CARE T | Cigarette smokers, former smokers, and workers exposed to asbestos | 18314 | 57   | 66  | AOs; PLB | Vitamin A 25,000 IU/day + beta-carotene 30 mg/day (n= 9420)                                                                  | 4   | 10 | AO: 127/9420<br>PLB: 123/8894                | Death from any cause: AO: 1855/9420<br>PLB: 1509/8894                    |

NA = not available; CV = cardiovascular; GI = gastrointestinal; ASA-LD = low-dose aspirin; ASA-VLD = very-low-dose aspirin; ASA-HD = high-dose aspirin; AOs = antioxidants; PLB = placebo; BC = Beta-carotene; Sele. = Selenium; IHD = ischaemic heart disease; TIA = transient ischaemic attack; PHS = Physicians' Health Study; CARET = Carotene and Retinol Efficacy Trial; HPS = Heart Protection Study; NPCT = Nutritional Prevention of Cancer trial; ATBC = Alpha-Tocopherol, Beta-Carotene Cancer Prevention study; SU.VI.MAX = Supplémentation en Vitamines et Minéraux Antioxydants study; HOPE = Heart Outcomes Prevention Evaluation trial; WHS = Women's Health Study; WACS= The Women's Antioxidant Cardiovascular Study; WAFACS = Women's Antioxidant and Folic Acid Cardiovascular Study; SELECT = Selenium and Vitamin E Cancer Prevention Trial; adetailed description of studies provided in eTable 2.4 in Appendix-2; brange; c median; dbased on data provided by author (refer Appendix-2).

**Table S3.12 RCTs reported efficacy and safety outcomes of folic acid**

| Author, year (reference)                         | Study name           | Population                                             | N randomized      | Mean age (years) | Male % | Interventions             | Antioxidants used with dose and frequency (n= randomized participants)                                                                                                                                                                  | Mean intended treatment duration (years) | Mean follow-up (years) | Efficacy outcomes (n/N)                                     | Safety outcomes with definition (n/N)<br>As per protocol safety outcomes are bleeding or CV events. If not available, we presented other safety outcomes reported in the study |
|--------------------------------------------------|----------------------|--------------------------------------------------------|-------------------|------------------|--------|---------------------------|-----------------------------------------------------------------------------------------------------------------------------------------------------------------------------------------------------------------------------------------|------------------------------------------|------------------------|-------------------------------------------------------------|--------------------------------------------------------------------------------------------------------------------------------------------------------------------------------|
| <b>Early risk of colorectal cancer incidence</b> |                      |                                                        |                   |                  |        |                           |                                                                                                                                                                                                                                         |                                          |                        |                                                             |                                                                                                                                                                                |
| Zhu 2003                                         | NA                   | History of atrophic gastritis                          | 216               | 56               | 63     | FA+B12; AOs; PLB          | Folic acid, 20 mg/day + vitamin-B12 1 mg, intramuscularly, per month for one year, then 20 mg two times a week plus 1 mg per three months for the next year (n=44)                                                                      | 2                                        | 6                      | FA: 0/44<br>PLB: 1/54                                       | NA                                                                                                                                                                             |
| Lonn 2005/<br>Lonn 2006                          | HOPE <sup>a</sup>    | History of CV diseases or diabetes                     | 9541              | 66               | 73     | AOs; FA+B6+B12; PLB       | Folic acid 2.5 mg/day + vitamin B6 50 mg/day + vitamin B12 1 mg/day (n=2758) [some participants also received vitamin E; subset of HOPE/HOPE-TOO trial]                                                                                 | 4.5                                      | 4.5                    | FA: 50/2758<br>PLB: 37/2764                                 | Death from any cause:<br>FA: 470/2758<br>PLB: 475/2764                                                                                                                         |
| Zhang 2008                                       | WAFA CS <sup>a</sup> | Female health professionals at high risk of CV disease | 5442 <sup>d</sup> | 63               | 0      | AOs; FAVB; FAVB+ AOs; PLB | Folic acid with vitamins B alone (Folic acid 2.5 mg/day + vitamin B12 1 mg/day + vitamin B6 50 mg/day) (n=342); Folic acid with vitamins B + antioxidants (n = 2379) [provided by author from the data April 16, 1998 - July 31, 2005 ] | 6.8 <sup>d</sup>                         | 6.8 <sup>d</sup>       | FA: 2/342<br>FA+AO:<br>16/2379<br>AO: 20/2376<br>PLB: 2/345 | Death from any cause:<br>FA gp: 147/2721<br>Control: 152/2721                                                                                                                  |
| Gaziano 2009                                     | PHS II               | History of MI                                          | 12064             | 64               | 83     | FA+B12; PLB               | Folic acid 2 mg/day + vitamin B12                                                                                                                                                                                                       | 6.7                                      | 6.7                    | FA: 86/6033<br>PLB:                                         | Death from any cause:                                                                                                                                                          |

|                                                                                                                                                                                                                                                                                                                                                                                                                                                                                                                                                                                                                                                                                                                                                                                                                                                                                                                                                          |                                  |                                                        |                    |    |    |                         |                                                                                                                                             |     |     |                                                                                                                                                    |                                                                                 |
|----------------------------------------------------------------------------------------------------------------------------------------------------------------------------------------------------------------------------------------------------------------------------------------------------------------------------------------------------------------------------------------------------------------------------------------------------------------------------------------------------------------------------------------------------------------------------------------------------------------------------------------------------------------------------------------------------------------------------------------------------------------------------------------------------------------------------------------------------------------------------------------------------------------------------------------------------------|----------------------------------|--------------------------------------------------------|--------------------|----|----|-------------------------|---------------------------------------------------------------------------------------------------------------------------------------------|-----|-----|----------------------------------------------------------------------------------------------------------------------------------------------------|---------------------------------------------------------------------------------|
|                                                                                                                                                                                                                                                                                                                                                                                                                                                                                                                                                                                                                                                                                                                                                                                                                                                                                                                                                          |                                  |                                                        |                    |    |    |                         | 1 mg/day (n= 6033)                                                                                                                          |     |     | 91/6031                                                                                                                                            | FA: 983/6033<br>PLB: 951/6031                                                   |
| Hankey 2012                                                                                                                                                                                                                                                                                                                                                                                                                                                                                                                                                                                                                                                                                                                                                                                                                                                                                                                                              | VITAT OPS                        | History of recent stroke or transient ischaemic attack | 8164               | 62 | 64 | FAVB; PLB               | Folic acid 2 mg/day + vitamin B6 25 mg/day + vitamin B12 0.5 mg/day (n= 4089)                                                               | 3.4 | 3.4 | FA: 21/4089<br>PLB: 21/4075                                                                                                                        | Death from any cause:<br>FA: 614/4089<br>PLB: 633/4075                          |
| Gao 2013                                                                                                                                                                                                                                                                                                                                                                                                                                                                                                                                                                                                                                                                                                                                                                                                                                                                                                                                                 | NA                               | General population                                     | 860                | 61 | 50 | FA;CTL                  | Folic acid 1 mg/ day (n=430)                                                                                                                | 3   | 3   | FA: 2/430<br>CLT: 2/430                                                                                                                            | NA                                                                              |
| <b>Long-term risk of colorectal cancer incidence or mortality</b>                                                                                                                                                                                                                                                                                                                                                                                                                                                                                                                                                                                                                                                                                                                                                                                                                                                                                        |                                  |                                                        |                    |    |    |                         |                                                                                                                                             |     |     |                                                                                                                                                    |                                                                                 |
| Ebbing 2009 (combined analysis of 2 trials)                                                                                                                                                                                                                                                                                                                                                                                                                                                                                                                                                                                                                                                                                                                                                                                                                                                                                                              | NORVI T/<br>WENB IT <sup>a</sup> | History of ischemic heart disease                      | 6837 (both trials) | 62 | 76 | FAVB;<br>FA+B12;<br>PLB | Folic acid 0.8 mg/day + vitamins B12 0.4 mg/day + vitamin B6 40 mg/day (n=1708);<br>Folic acid 0.8 mg/day + vitamin B12 0.4 mg/day (n=1703) | 3.2 | 6.4 | CRC incidence<br>FAVB:<br>25/1708<br>FA+B12:<br>22/1703<br>PLB:<br>22/1721<br>CRC incidence<br>FAVB:<br>9/1703<br>FA+B12:<br>5/1705<br>PLB: 7/1721 | Death from any cause:<br>FAVB: 281/1708<br>FA+B12:<br>267/1703<br>PLB: 232/1721 |
| <p>NA = not available; CV = cardiovascular; GI = gastrointestinal; AOs = antioxidants; PLB = placebo; FA=folic acid; FAVB= folic acid with vitamin B6 and B12; B6= vitamin B6; B12=vitamin B12; HOPE = Heart Outcomes Prevention Evaluation trial; WHS = Women's Health Study; WACS= The Women's Antioxidant Cardiovascular Study; WAFACS = Women's Antioxidant and Folic Acid Cardiovascular Study; SELECT = Selenium and Vitamin E Cancer Prevention Trial; SEARCH= Study of the Effectiveness of Additional Reductions in Cholesterol and Homocysteine; PHS = Physicians' Health Study; NORVIT = Norwegian Vitamin Trial; WENBIT = Western Norway B Vitamin Intervention Trial; WAFACS = Women's Antioxidant and Folic Acid Cardiovascular Study.</p> <p><sup>a</sup>detailed description of studies provided in eTable 2.4 in Appendix-2; <sup>b</sup>range; <sup>c</sup>median; <sup>d</sup>based on data provided by author (refer Appendix-2)</p> |                                  |                                                        |                    |    |    |                         |                                                                                                                                             |     |     |                                                                                                                                                    |                                                                                 |

| <b>Early risk of CRC incidence</b>                                  |                        |                                                         |                                                                           |
|---------------------------------------------------------------------|------------------------|---------------------------------------------------------|---------------------------------------------------------------------------|
| Comparisons                                                         | Main analysis-All RCTs | Sensitivity analysis                                    |                                                                           |
|                                                                     |                        | RCTs with low ROB (with HOPE study data for folic acid) | RCTs with low ROB (FA: folic acid ± other co-interventions as single CPA) |
| FA vs PLB                                                           | 1.00 [0.14, 7.14]      | 1.00 [0.14, 7.10]                                       | 1.02 [0.82, 1.26]                                                         |
| Folic+B12 vs PLB                                                    | 0.94 [0.66, 1.35]      | 0.94 [0.68, 1.31]                                       | NA                                                                        |
| Folic+B12+B6 vs PLB                                                 | 1.17 [0.81, 1.70]      | 0.94 [0.53, 1.67]                                       | NA                                                                        |
| Folic+B12+B6+Antiox Vs PLB                                          | 0.83 [0.42, 1.62]      | 0.83 [0.43, 1.60]                                       | NA                                                                        |
| <b>Long-term risk of CRC incidence (0-20 years or more)</b>         |                        |                                                         |                                                                           |
| Combined analysis and extended follow-up of 2 RCTs (NORVIT/ WENBIT) |                        |                                                         |                                                                           |
| Folic+B12 vs PLB: 1.01 [0.56, 1.82]                                 |                        |                                                         |                                                                           |
| Folic+B12+B6 vs PLB: 1.15 [0.65, 2.02]                              |                        |                                                         |                                                                           |

## Supplement 4: Pairwise meta-analysis of chemopreventive agents (CPAs)

**Table S4.1 Pairwise meta-analyses: early risk of CRC incidence**

| Comparisons         |                | Main analysis             |                                            |                      |
|---------------------|----------------|---------------------------|--------------------------------------------|----------------------|
|                     |                | No. of studies (all RCTs) | Pairwise meta-analysis risk ratio [95% CI] | Heterogeneity, $I^2$ |
| ASA-HD              | PCB            | 2                         | 0.92 [0.56, 1.49]                          | 0%                   |
| ASA-LD              | PCB            | 1                         | 1.15 [0.80, 1.64]                          | NA                   |
| ASA-VLD             | PCB            | 1                         | 0.84 [0.61, 1.16]                          | NA                   |
| Antiox              | PCB            | 11                        | 0.94 [0.79, 1.11]                          | 26.6%                |
| VitD                | PCB            | 1                         | 1.03 [0.61, 1.74]                          | NA                   |
| Folic+B12           | PCB            | 2                         | 0.94 [0.70, 1.26]                          | 0.0%                 |
| Folic+B12           | Antiox         | 1                         | 2.64 [0.05, 131.28]                        | NA                   |
| Folic+B12+B6        | PCB            | 3                         | 1.22 [0.87, 1.71]                          | 0.0%                 |
| ASA-VLD+Antiox      | PCB            | 1                         | 0.92 [0.67, 1.25]                          | NA                   |
| ASA-VLD+Antiox      | ASA-VLD        | 1                         | 1.09 [0.78, 1.51]                          | NA                   |
| Antiox              | ASA-VLD        | 1                         | 0.98 [0.71, 1.38]                          | NA                   |
| Antiox              | ASA-VLD+Antiox | 1                         | 0.99 [0.65, 1.25]                          | NA                   |
| Calcium+VitD        | PCB            | 2                         | 1.07 [0.86, 1.33]                          | 0.0%                 |
| Calcium             | PCB            | 1                         | 0.13 [0.01, 2.69]                          | NA                   |
| Calcium+VitD        | Calcium        | 1                         | 2.99 [0.12, 73.28]                         | NA                   |
| Folic+B12+B6+Antiox | PCB            | 1                         | 1.16 [0.27, 5.02]                          | NA                   |
| Folic+B12+B6        | Antiox         | 1                         | 0.69 [0.16, 2.96]                          | NA                   |
| Folic+B12+B6+Antiox | Antiox         | 1                         | 0.80 [0.41, 1.54]                          | NA                   |
| Folic+B12+B6+Antiox | Folic+B12+B6   | 1                         | 1.15 [0.27, 4.98]                          | NA                   |
| Folic               | PCB            | 1                         | 1.00 [0.14, 7.07]                          | NA                   |

**Inference:** No interventions demonstrated statistically significant reduction in early risk of CRC incidence.  
**Abbreviations:** Antiox, antioxidants; ASA-VLD, very-low-dose-aspirin; ASA-LD, low-dose-aspirin; ASA-HD, high-dose-aspirin; B12, vitamin B12; B6, vitamin B6; Calcium, calcium supplements; Folic, folic acid; PCB, placebo; VitD, vitamin D; NA: not available.



Table S4.2 Pairwise meta-analyses: long-term risk of CRC incidence and mortality

| Comparisons                                               |           | No. of studies (RCTs follow-up more than 10 years) Scenario 1- Primary analysis | Pairwise meta-analysis risk ratio [95% CI] | Heterogeneity, $I^2$ | No. of studies (all RCTs: follow-up 0 to 20 years or more) Scenario 2 | Pairwise meta-analysis risk ratio [95% CI] | Heterogeneity, $I^2$ |
|-----------------------------------------------------------|-----------|---------------------------------------------------------------------------------|--------------------------------------------|----------------------|-----------------------------------------------------------------------|--------------------------------------------|----------------------|
| <b>Incidence of colorectal cancer-long-term follow-up</b> |           |                                                                                 |                                            |                      |                                                                       |                                            |                      |
| ASA-HD                                                    | PCB       | 2                                                                               | <b>0.74 [0.57, 0.97]</b>                   | 0.0%                 | 2                                                                     | <b>0.74 [0.57, 0.97]</b>                   | 0.0%                 |
| ASA-LD                                                    | PCB       | 1                                                                               | 1.03 [0.83, 1.28]                          | NA                   | 1                                                                     | 1.03 [0.83, 1.28]                          | NA                   |
| Antiox                                                    | PCB       | 2                                                                               | 1.06 [0.89, 1.30]                          | 9.2%                 | 3                                                                     | 1.06 [0.89, 1.30]                          | 0.0%                 |
| B6                                                        | PCB       | -                                                                               | -                                          | -                    | 1                                                                     | 1.19 [0.68, 2.10]                          | NA                   |
| Folic+B12                                                 | PCB       | -                                                                               | -                                          | -                    | 1                                                                     | 1.01 [0.56, 1.82]                          | NA                   |
| Folic+B12+B6                                              | PCB       | -                                                                               | -                                          | -                    | 1                                                                     | 1.15 [0.65, 2.02]                          | NA                   |
| Folic+B12                                                 | B6        | -                                                                               | -                                          | -                    | 1                                                                     | 0.85 [0.48, 1.49]                          | NA                   |
| Folic+B12+B6                                              | B6        | -                                                                               | -                                          | -                    | 1                                                                     | 0.96 [0.56, 1.66]                          | NA                   |
| Folic+B12+B6                                              | Folic+B12 | -                                                                               | -                                          | -                    | 1                                                                     | 1.13 [0.64, 2.00]                          | NA                   |
| ASA-VLD                                                   | PCB       | 1                                                                               | <b>0.81 [0.67, 0.98]</b>                   | NA                   | 1                                                                     | <b>0.81 [0.67, 0.98]</b>                   | NA                   |
| Calcium+VitD                                              | PCB       | 1                                                                               | 0.96 [0.81, 1.14]                          | NA                   | 1                                                                     | 0.96 [0.81, 1.14]                          | NA                   |
| <b>Mortality due to colorectal cancer</b>                 |           |                                                                                 |                                            |                      |                                                                       |                                            |                      |
| ASA-HD                                                    | PCB       | 2                                                                               | 0.72 [0.51, 1.03]                          | 0.0%                 | 2                                                                     | 0.72 [0.51, 1.03]                          | 0.0%                 |
| ASA-LD                                                    | ASA-HD    | 1                                                                               | 0.74 [0.30, 1.82]                          | NA                   | 1                                                                     | 0.74 [0.30, 1.82]                          | NA                   |

| Comparisons  |                     | No. of studies (RCTs follow-up more than 10 years) Scenario 1- Primary analysis | Pairwise meta-analysis risk ratio [95% CI] | Heterogeneity, I <sup>2</sup> | No. of studies (all RCTs: follow-up 0 to 20 years or more) Scenario 2 | Pairwise meta-analysis risk ratio [95% CI] | Heterogeneity, I <sup>2</sup> |
|--------------|---------------------|---------------------------------------------------------------------------------|--------------------------------------------|-------------------------------|-----------------------------------------------------------------------|--------------------------------------------|-------------------------------|
| ASA-LD       | PCB                 | 1                                                                               | 0.50 [0.22, 1.17]                          | NA                            | 1                                                                     | 0.50 [0.22, 1.17]                          | NA                            |
| ASA-VLD      | ASA-LD              | 1                                                                               | 2.03 [0.76, 5.39]                          | NA                            | 1                                                                     | 2.03 [0.76, 5.39]                          | NA                            |
| ASA-VLD      | PCB                 | 2                                                                               | <b>0.63 [0.43, 0.93]</b>                   | 0.0                           | 2                                                                     | <b>0.63 [0.43, 0.93]</b>                   | 0.0%                          |
| B6           | PCB                 | -                                                                               | -                                          | -                             | 1                                                                     | 0.72 [0.23, 2.27]                          | NA                            |
| Folic+B12    | B6                  | -                                                                               | -                                          | -                             | 1                                                                     | 1.80 [0.61, 5.37]                          | NA                            |
| Folic+B12    | PCB                 | -                                                                               | -                                          | -                             | 1                                                                     | 1.30 [0.48, 3.48]                          | NA                            |
| Folic+B12+B6 | B6                  | -                                                                               | -                                          | -                             | 1                                                                     | 0.60 [0.14, 2.50]                          | NA                            |
| Folic+B12+B6 | Folic+B12+B6+Antiox | -                                                                               | -                                          | -                             | 1                                                                     | 0.33 [0.09, 1.23]                          | NA                            |
| Folic+B12+B6 | PCB                 | -                                                                               | -                                          | -                             | 1                                                                     | 0.43 [0.11, 1.67]                          | NA                            |

Abbreviations: Antiox, any antioxidants; ASA-VLD, very-low-dose-aspirin; ASA-LD, low-dose-aspirin; ASA-HD, high-dose-aspirin; PCB, placebo; Folic, folic acid; B12, vitamin B12; B6, vitamin B6; Calcium, calcium supplements; VitD, vitamin D.

**Table S4.3 Pairwise meta-analyses: Safety outcomes**

| Comparisons                                                                                                                                                                                                                                                                                                                                                                                                                                                                                                                                                                                                                        |         | No. of studies<br>(all RCTs) | Pairwise meta-analysis<br>risk ratio [95% CI] | Heterogeneity<br>, I <sup>2</sup> |
|------------------------------------------------------------------------------------------------------------------------------------------------------------------------------------------------------------------------------------------------------------------------------------------------------------------------------------------------------------------------------------------------------------------------------------------------------------------------------------------------------------------------------------------------------------------------------------------------------------------------------------|---------|------------------------------|-----------------------------------------------|-----------------------------------|
| <b>Incidence of major gastrointestinal bleeding</b>                                                                                                                                                                                                                                                                                                                                                                                                                                                                                                                                                                                |         |                              |                                               |                                   |
| ASA-HD                                                                                                                                                                                                                                                                                                                                                                                                                                                                                                                                                                                                                             | PCB     | 2                            | <b>7.76 [2.07, 29.16]</b>                     | 0.0%                              |
| ASA-HD                                                                                                                                                                                                                                                                                                                                                                                                                                                                                                                                                                                                                             | ASA-LD  | 1                            | 1.88 [0.88, 4.01]                             | NA                                |
| ASA-LD                                                                                                                                                                                                                                                                                                                                                                                                                                                                                                                                                                                                                             | PCB     | 4                            | <b>1.88 [1.22, 2.90]</b>                      | 0.0%                              |
| ASA-LD                                                                                                                                                                                                                                                                                                                                                                                                                                                                                                                                                                                                                             | ASA-VLD | 1                            | 0.99 [0.14, 7.00]                             | NA                                |
| ASA-VLD                                                                                                                                                                                                                                                                                                                                                                                                                                                                                                                                                                                                                            | PCB     | 8                            | <b>1.44 [1.14, 1.80]</b>                      | 0.0%                              |
| <b>CV Deaths</b>                                                                                                                                                                                                                                                                                                                                                                                                                                                                                                                                                                                                                   |         |                              |                                               |                                   |
| ASA-HD                                                                                                                                                                                                                                                                                                                                                                                                                                                                                                                                                                                                                             | PCB     | 6                            | 0.94 [0.84, 1.05]                             | 18.3%                             |
| ASA-LD                                                                                                                                                                                                                                                                                                                                                                                                                                                                                                                                                                                                                             | PCB     | 6                            | 0.87 [0.76, 1.01]                             | 9.0%                              |
| ASA-VLD                                                                                                                                                                                                                                                                                                                                                                                                                                                                                                                                                                                                                            | PCB     | 10                           | 0.91 [0.77, 1.07]                             | 44.4%                             |
| <p>Safety outcomes: data from intervention phase (trial phase) of all RCTs of aspirin reported by the latest systematic review by USPTF; our analyses followed the intention-to-treat principle; data were based on 'at-margins' analysis (comparing all groups that received intervention with groups that did not receive intervention). For more details see eTable 3.8.</p> <p>Abbreviations: Antiox, antioxidants; ASA-HD, high-dose aspirin; ASA-LD, low-dose aspirin; ASA-VLD, very low-dose aspirin; B12, vitamin B12; B6, vitamin B6; Calcium, calcium supplements; Folic, folic acid; PCB, placebo; VitD, vitamin D.</p> |         |                              |                                               |                                   |

**Supplement 5: Network meta-analyses of CPAs: early risk of CRC incidence**

**Figure S5.1 Network plot of CPAs: Early risk of CRC incidence**

**i. All RCTs**

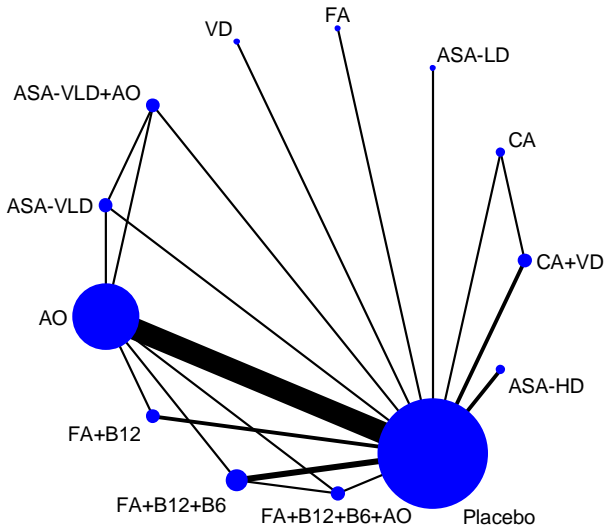

**ii. RCTs with low risk of bias**

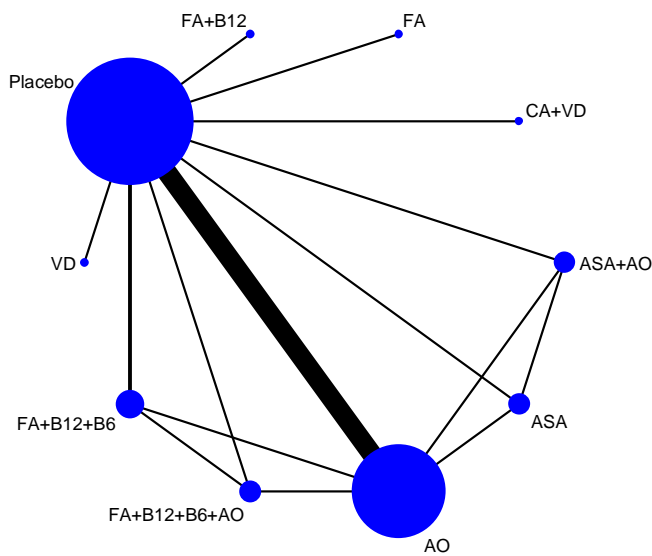

Abbreviations: AO, antioxidants; ASA-HD, high-dose aspirin; ASA-LD, low-dose aspirin; ASA-VLD, very low-dose aspirin; B12, vitamin B12; B6, vitamin B6; CA, calcium supplements; FA, folic acid; VD, vitamin D.

**Table S5.1: Results of network meta-analysis: Early risk of CRC incidence (primary analysis: all RCTs)**

| Intervention                                  | All RCTs          |            |
|-----------------------------------------------|-------------------|------------|
|                                               | RR [95% CI]       | SUCRA rank |
| Calcium                                       | 0.19 [0.01, 3.60] | 1          |
| Folic+B12+B6+Antiox                           | 0.83 [0.42, 1.62] | 2          |
| ASA-VLD                                       | 0.89 [0.63, 1.26] | 3          |
| Antiox                                        | 0.94 [0.81, 1.10] | 4          |
| ASA-HD                                        | 0.91 [0.55, 1.53] | 5          |
| Folic+B12                                     | 0.94 [0.66, 1.35] | 6          |
| ASA-VLD+Antiox                                | 0.97 [0.69, 1.37] | 7          |
| Folic                                         | 1.00 [0.14, 7.14] | 8          |
| PCB                                           | Reference         | 9          |
| VitD                                          | 1.03 [0.59, 1.82] | 10         |
| Calcium+VitD                                  | 1.06 [0.78, 1.44] | 11         |
| ASA-LD                                        | 1.15 [0.75, 1.74] | 12         |
| Folic+B12+B6                                  | 1.17 [0.81, 1.70] | 13         |
| Overall inconsistency<br>Chi-square (p value) | 3.53 (0.740)      |            |
| <b>Number of studies</b>                      | <b>21</b>         |            |

Abbreviations: Antiox, antioxidants; ASA-HD, high-dose aspirin; ASA-LD, low-dose aspirin; ASA-VLD, very low-dose aspirin; B12, vitamin B12; B6, vitamin B6; Calcium, calcium supplements; Folic, folic acid; PCB, placebo; VitD, vitamin D.

**Figure S5.2 SUCRA ranking curve for early risk of CRC incidence**

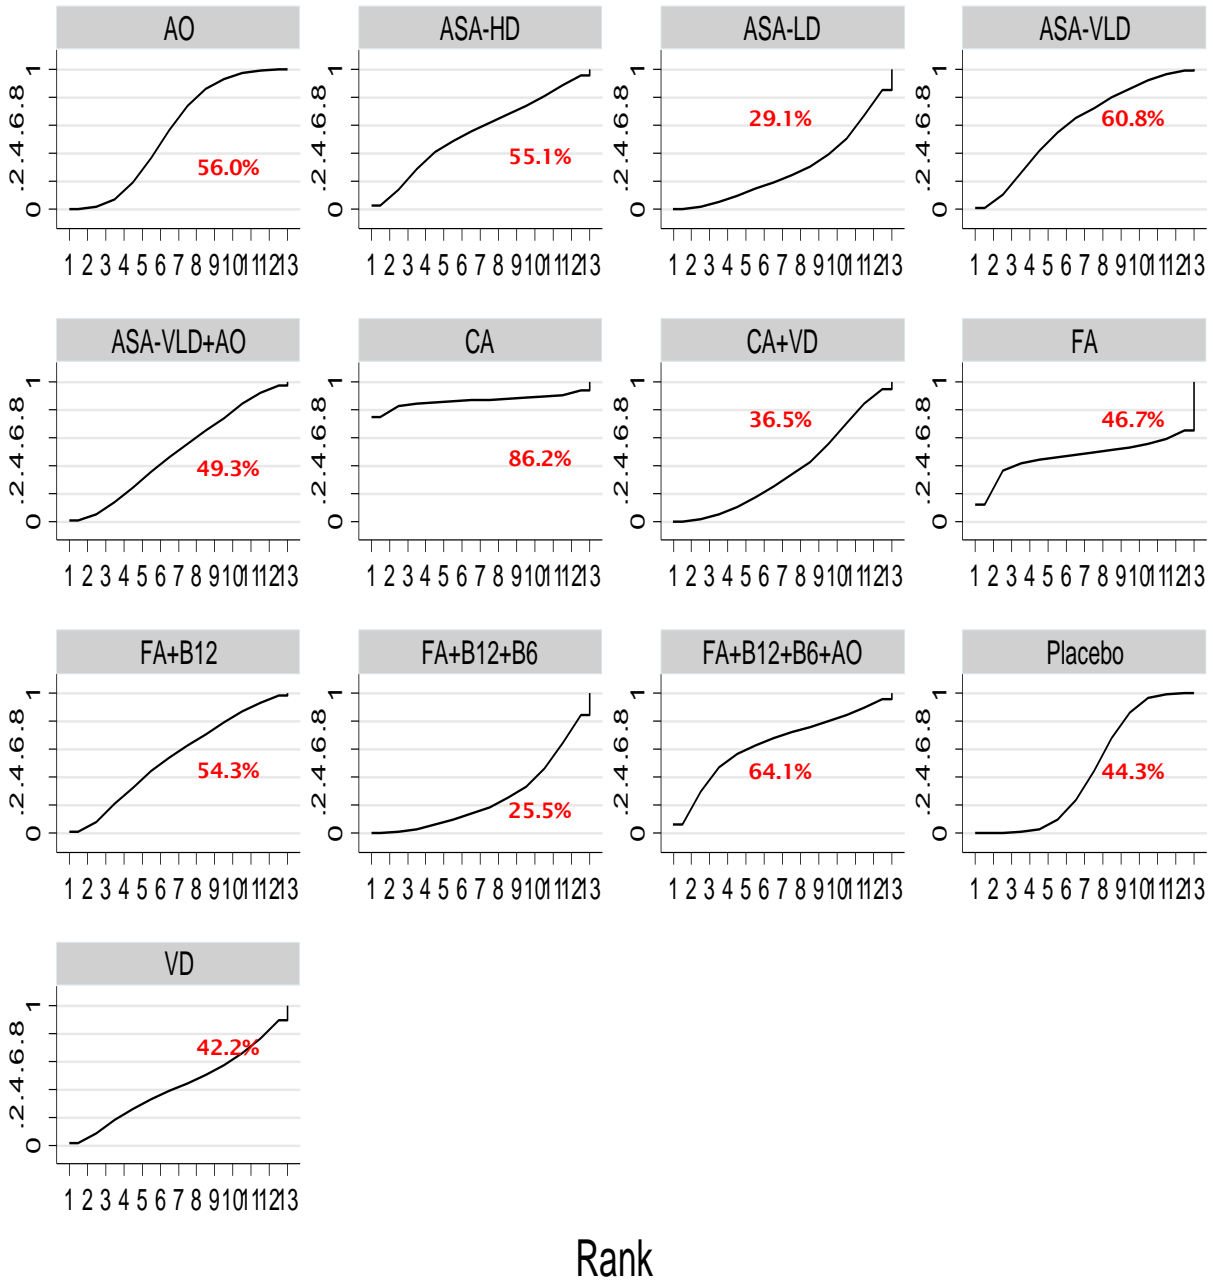

Graphs by Treatment

Abbreviations: Antiox, antioxidants; ASA-HD, high-dose aspirin; ASA-LD, low-dose aspirin; ASA-VLD, very low-dose aspirin; B12, vitamin B12; B6, vitamin B6; Calcium, calcium supplements; Folic, folic acid; PCB, placebo; VitD, vitamin D.

Higher SUCRA scores (ranging from 0 to 1) correspond to higher ranking for prevention of CRC incidence and mortality and lower SUCRA scores correspond to higher ranking for safety in terms of CV mortality and GI bleeding events, compared with other CPAs.

**Figure S5.3 Pairwise (upper right portion) and network (lower left portion) meta-analytic results for early risk of CRC incidence – (all RCTs)**

|                      |                      |                           |                      |                      |                     |                     |                      |                     |                      |                      |                     |                      |
|----------------------|----------------------|---------------------------|----------------------|----------------------|---------------------|---------------------|----------------------|---------------------|----------------------|----------------------|---------------------|----------------------|
| AO                   | NA                   | NA                        | 0.98<br>(0.71, 1.38) | 0.99<br>(0.65, 1.25) | NA                  | NA                  | 1.00 (0.14,<br>7.07) | 0.39<br>[0.008, 20] | 1.45 (0.34,<br>6.25) | 1.25 (0.65,<br>2.43) | NA                  | 0.94<br>(0.79, 1.11) |
| 1.03<br>(0.60,1.75)  | ASA-HD               | NA                        | NA                   | NA                   | NA                  | NA                  | NA                   | NA                  | NA                   | NA                   | NA                  | 0.92<br>[0.56, 1.49] |
| 0.82<br>(0.53,1.29)  | 0.80<br>(0.41,1.55)  | ASA-LD                    | NA                   | NA                   | NA                  | NA                  | NA                   | NA                  | NA                   | NA                   | NA                  | 1.15<br>[0.80, 1.64] |
| 1.05<br>(0.74,1.50)  | 1.03<br>(0.55,1.91)  | 1.28<br>(0.74,2.21)       | ASA-VLD              | 0.92<br>[0.66, 1.28] | NA                  | NA                  | NA                   | NA                  | NA                   | NA                   | NA                  | 0.84<br>[0.61, 1.16] |
| 0.97<br>(0.69,1.37)  | 0.95<br>(0.51,1.75)  | 1.18<br>(0.69,2.02)       | 0.92<br>(0.62,1.36)  | ASA-<br>VLD+AO       | NA                  | NA                  | NA                   | NA                  | NA                   | NA                   | NA                  | 0.92<br>[0.67, 1.25] |
| 4.98<br>(0.26,95.18) | 4.86<br>(0.24,96.62) | 6.06<br>(0.31,118.65<br>) | 4.73<br>(0.24,91.73) | 5.14<br>(0.26,99.65) | CA                  | 0.33<br>[0.01,0.33] | NA                   | NA                  | NA                   | NA                   | NA                  | 0.13<br>[0.01, 2.69] |
| 0.89<br>(0.63,1.25)  | 0.87<br>(0.48,1.57)  | 1.08<br>(0.64,1.81)       | 0.84<br>(0.53,1.34)  | 0.91<br>(0.58,1.44)  | 0.18<br>(0.01,3.40) | CA+VD               | NA                   | NA                  | NA                   | NA                   | NA                  | 1.07<br>[0.86, 1.33] |
| 1.00<br>(0.68,1.48)  | 0.98<br>(0.52,1.83)  | 1.22<br>(0.70,2.12)       | 0.95<br>(0.58,1.57)  | 1.03<br>(0.63,1.70)  | 0.20<br>(0.01,3.91) | 1.13<br>(0.71,1.81) | FA                   | FA+B12              | NA                   | NA                   | NA                  | 0.94<br>[0.70, 1.26] |
| 0.80<br>(0.54,1.20)  | 0.78<br>(0.42,1.48)  | 0.98<br>(0.56,1.71)       | 0.76<br>(0.46,1.27)  | 0.83<br>(0.50,1.37)  | 0.16<br>(0.01,3.14) | 0.91<br>(0.56,1.46) | 1.06<br>(0.14,7.86)  | 0.80<br>(0.48,1.34) | FA+B12+B6            | 0.87<br>[0.20, 3.70] |                     | 1.22<br>[0.87, 1.71] |
| 1.14<br>(0.59,2.21)  | 1.11<br>(0.48,2.59)  | 1.39<br>(0.63,3.07)       | 1.08<br>(0.51,2.28)  | 1.18<br>(0.56,2.47)  | 0.23<br>(0.01,4.70) | 1.29<br>(0.61,2.70) | 0.85<br>(0.12,6.32)  | 1.14<br>(0.53,2.44) | 1.42<br>(0.67,3.01)  | FA+B12+B6<br>+ AO    |                     | 1.16<br>[0.27, 5.02] |
| 0.91<br>(0.51,1.64)  | 0.89<br>(0.41,1.90)  | 1.11<br>(0.55,2.24)       | 0.86<br>(0.45,1.68)  | 0.94<br>(0.49,1.82)  | 0.18<br>(0.01,3.67) | 1.03<br>(0.54,1.95) | 1.21<br>(0.15,9.69)  | 0.91<br>(0.47,1.78) | 1.13<br>(0.58,2.23)  | 0.80<br>(0.33,1.92)  | VD                  | 1.03<br>[0.61, 1.74] |
| 0.94<br>(0.81,1.10)  | 0.92<br>(0.55,1.53)  | 1.15<br>(0.75,1.74)       | 0.89<br>(0.63,1.26)  | 0.97<br>(0.69,1.37)  | 0.19<br>(0.01,3.60) | 1.06<br>(0.78,1.44) | 0.97<br>(0.12,7.49)  | 0.94<br>(0.66,1.35) | 1.17<br>(0.81,1.70)  | 0.83<br>(0.42,1.62)  | 1.03<br>(0.59,1.82) | Placebo              |

Outcomes are expressed as risk ratios (95% confidence intervals). For the pairwise meta-analyses, risk ratio less than 1 indicate that the treatment specified in the column is more efficacious. For the network meta-analysis, risk ratio less than 1 indicate that the treatment specified in the row is more efficacious. Bold results indicate statistical significance. Abbreviations: AO, antioxidants; ASA-HD, high-dose aspirin; ASA-LD, low-dose aspirin; ASA-VLD, very low-dose aspirin; B12, vitamin B12; B6, vitamin B6; CA, calcium supplements; FA, folic acid; VD, vitamin D; NA, not available.

**Table S5.2 Results of sensitivity analyses of network meta-analysis: Early risk of CRC incidence**

| Strategies of sensitivity analyses described in Appendix 2 (eTable 2.3) |                        |            |                                                    |            |                                                                              |            |                                                    |            |
|-------------------------------------------------------------------------|------------------------|------------|----------------------------------------------------|------------|------------------------------------------------------------------------------|------------|----------------------------------------------------|------------|
| Intervention                                                            | Main analysis-All RCTs |            | RCTs with low ROB<br>[and PHS-1 anti-oxidant data] |            | RCTs with low ROB<br>(FA: folic acid ± other co-interventions as single CPA) |            | RCTs with low ROB and<br>Modifying HOPE study data |            |
|                                                                         | RR [95% CI]            | SUCRA rank | RR [95% CI]                                        | SUCRA rank | RR [95% CI]                                                                  | SUCRA rank | RR [95% CI]                                        | SUCRA rank |
| Calcium                                                                 | 0.19 [0.01, 3.60]      | 1          | NA                                                 | -          | NA                                                                           | -          | NA                                                 | -          |
| ASA-VLD                                                                 | 0.89 [0.63, 1.26]      | 2          | 0.90 [0.67, 1.21]                                  | 2          | 0.90 [0.67, 1.21]                                                            | 1          | 0.91 [0.66, 1.24]                                  | 2          |
| Folic+B12+B6+Antiox                                                     | 0.83 [0.42, 1.62]      | 3          | 0.82 [0.44, 1.58]                                  | 1          | NA                                                                           | -          | 0.83 [0.43, 1.60]                                  | 1          |
| Antiox                                                                  | 0.94 [0.81, 1.10]      | 4          | 0.95 [0.85, 1.07]                                  | 4          | 0.96 [0.84, 1.10]                                                            | 3          | 0.98 [0.87, 1.10]                                  | 6          |
| ASA-HD                                                                  | 0.91 [0.55, 1.53]      | 5          | 0.92 [0.56, 1.50]                                  | 3          | 0.92 [0.56, 1.50]                                                            | 2          | 0.92 [0.56, 1.51]                                  | 3          |
| Folic+B12                                                               | 0.94 [0.66, 1.35]      | 6          | 0.94 [0.69, 1.30]                                  | 5          | NA                                                                           | -          | 0.94 [0.68, 1.31]                                  | 4          |
| ASA-VLD+Antiox                                                          | 0.97 [0.69, 1.37]      | 7          | 0.92 [0.65, 1.28]                                  | 6          | 0.98 [0.73, 1.31]                                                            | 4          | 0.99 [0.73, 1.34]                                  | 8          |
| Folic                                                                   | 1.00 [0.14, 7.14]      | 8          | 1.00 [0.14, 7.09]                                  | 7          | 1.02 [0.82, 1.26]                                                            | 7          | 1.00 [0.14, 7.10]                                  | 7          |
| PCB                                                                     | Reference              | 9          | Reference                                          | 8          | Reference                                                                    | 5          | Reference                                          | 9          |
| VitD                                                                    | 1.03 [0.59, 1.82]      | 10         | 1.03 [0.61, 1.76]                                  | 9          | 1.03 [0.61, 1.76]                                                            | 6          | 1.03 [0.60, 1.78]                                  | 11         |
| Calcium+VitD                                                            | 1.06 [0.78, 1.44]      | 11         | 1.09 [0.84, 1.40]                                  | 10         | 1.09 [0.86, 1.38]                                                            | 8          | 1.09 [0.84, 1.41]                                  | 10         |
| ASA-LD                                                                  | 1.15 [0.75, 1.74]      | 12         | NA                                                 | -          | NA                                                                           | -          | NA                                                 | -          |
| Folic+B12+B6                                                            | 1.17 [0.81, 1.70]      | 13         | 1.18 [0.84, 1.67]                                  | 11         | NA                                                                           | -          | 0.94 [0.53, 1.67]                                  | 5          |
| Overall inconsistency<br>Chi-square (p value)                           | <b>3.53 (0.740)</b>    |            | <b>1.56 (0.669)</b>                                |            | <b>1.73 (0.629)</b>                                                          |            | <b>1.32 (0.724)</b>                                |            |
| <b>Number of studies</b>                                                | <b>21</b>              |            | <b>18</b>                                          |            | <b>18</b>                                                                    |            | <b>18</b>                                          |            |

Abbreviations: Antiox, antioxidants; ASA-HD, high-dose aspirin; ASA-LD, low-dose aspirin; ASA-VLD, very low-dose aspirin; B12, vitamin B12; B6, vitamin B6; Calcium, calcium supplements; Folic, folic acid; PCB, placebo; VitD, vitamin D; NA, not available.



## Supplement 6: Network meta-analyses of CPAs: Long-term risk of CRC incidence

Figure S6.1 Network plot of CPAs: long-term risk of CRC incidence

i. RCTs reported long-term CRC incidence with follow-up more than 10 years (primary analysis)

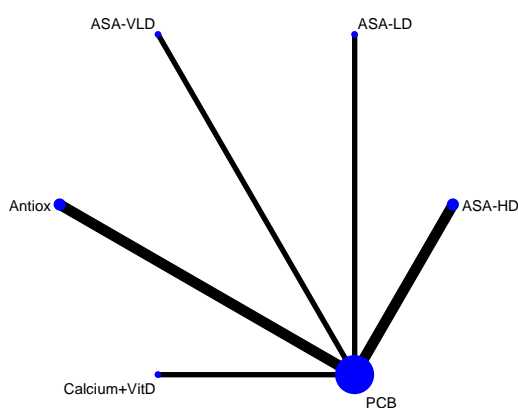

ii. All RCTs reported long-term CRC incidence with follow-up 0-20 years or more

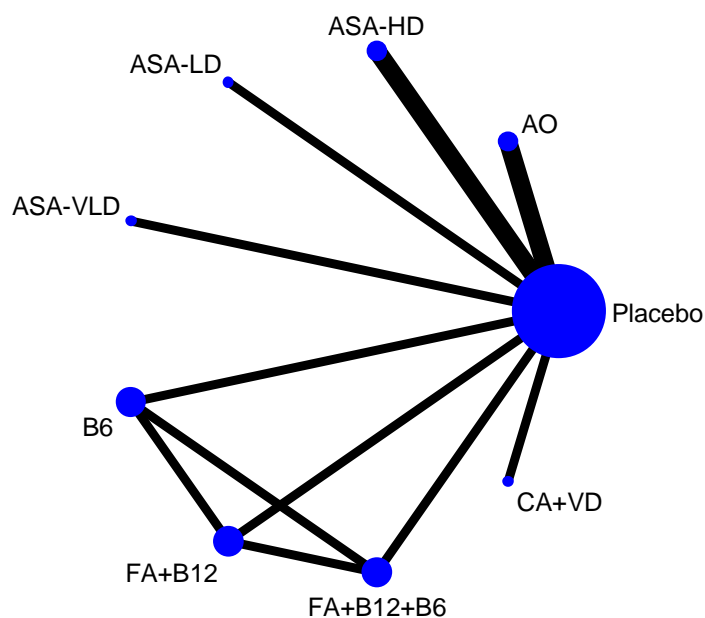

Abbreviations: Antiox, antioxidants; ASA-HD, high-dose aspirin; ASA-LD, low-dose aspirin; ASA-VLD, very low-dose aspirin; B12, vitamin B12; B6, vitamin B6; Calcium, calcium supplements; Folic, folic acid; PCB, placebo; VitD, vitamin D.

**Table S6.1 Results of network meta-analysis: Long-term risk of CRC incidence (studies with follow-up more than 10 years-primary analysis)**

| Intervention                                  | RCTs follow-up more than 10 years |            |
|-----------------------------------------------|-----------------------------------|------------|
|                                               | RR [95% CI]                       | SUCRA rank |
| ASA-HD                                        | <b>0.74 [0.57, 0.97]</b>          | 1          |
| ASA-VLD                                       | <b>0.81 [0.67, 0.98]</b>          | 2          |
| Calcium+VitD                                  | 0.96 [0.81, 1.13]                 | 3          |
| PCB                                           | reference                         | 4          |
| <b>ASA-LD</b>                                 | <b>1.03 [0.83, 1.27]</b>          | 5          |
| Antiox                                        | 1.07 [0.89, 1.28]                 | 6          |
| Overall inconsistency<br>Chi-square (p value) | 0.28 (0.597)                      |            |
| <b>Number of studies</b>                      | <b>7</b>                          |            |

Abbreviations: Antiox, antioxidants; ASA-HD, high-dose aspirin; ASA-LD, low-dose aspirin; ASA-VLD, very low-dose aspirin; Calcium, calcium supplements; PCB, placebo; VitD, vitamin D.

**Note:** We could not demonstrate the protective effect of low-dose-aspirin on CRC incidence from the available single study (long-term follow-up of PHS-1 trial<sup>8,22,69</sup>). An obvious reason for this discrepancy could be the short duration of follow-up in this study, which was extended to only 12 years and therefore could not really contribute to the analyses of long-term effects on CRC incidence. Whereas duration of follow-up was 18 years or more in the studies tested high-dose-aspirin and very-low-dose aspirin.

**Figure S6.2 SUCRA ranking curve for long-term risk of CRC incidence (Studies with follow-up more than 10 years)**

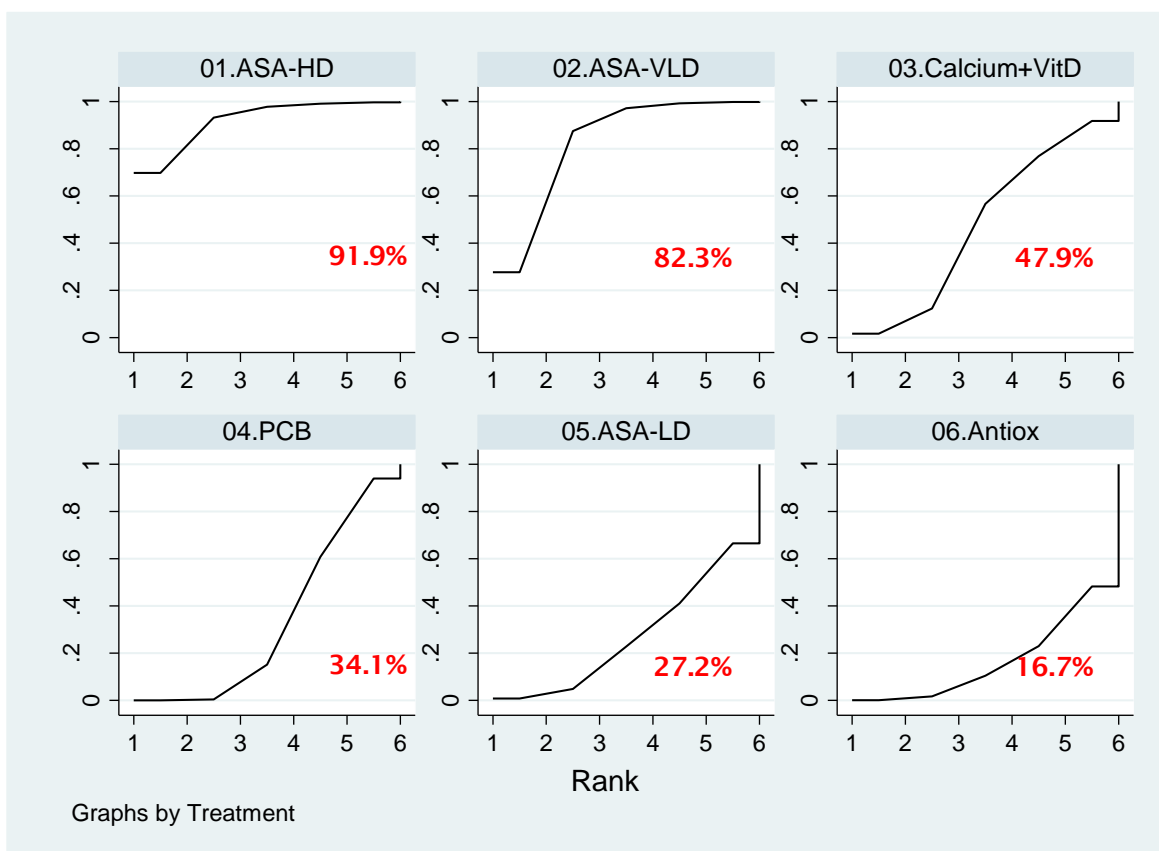

**Abbreviations:** Antiox, antioxidants; ASA-HD, high-dose aspirin; ASA-LD, low-dose aspirin; ASA-VLD, very low-dose aspirin; Calcium, calcium supplements; PCB, placebo; VitD, vitamin D.

Higher SUCRA scores (ranging from 0 to 1) correspond to higher ranking for prevention of CRC incidence and mortality and lower SUCRA scores correspond to higher ranking for safety in terms of CV mortality and GI bleeding events, compared with other CPAs.

**Figure S6.3 Pairwise (upper right portion) and network (lower left portion) meta-analytic results for long-term risk of CRC incidence (Studies with follow-up more than 10 years)**

|                                   |                     |                                   |                     |                          |                                   |
|-----------------------------------|---------------------|-----------------------------------|---------------------|--------------------------|-----------------------------------|
| <b>ASA-HD</b>                     | NA                  | NA                                | NA                  | NA                       | <b>0.74</b><br><b>(0.57,0.97)</b> |
| 0.72<br>(0.51,1.01)               | <b>ASA-LD</b>       | NA                                | NA                  | NA                       | 1.03<br>(0.83,1.28)               |
| 0.91<br>(0.66,1.26)               | 1.27<br>(0.96,1.68) | <b>ASA-VLD</b>                    | NA                  | NA                       | <b>0.81</b><br><b>(0.67,0.98)</b> |
| <b>0.69</b><br><b>(0.50,0.95)</b> | 0.96<br>(0.73,1.27) | <b>0.76</b><br><b>(0.59,0.98)</b> | <b>Antiox</b>       | NA                       | 1.06<br>(0.89,1.30)               |
| 0.77<br>(0.56,1.06)               | 1.08<br>(0.82,1.41) | 0.85<br>(0.66,1.09)               | 1.12<br>(0.87,1.43) | <b>Calcium+<br/>VitD</b> | 0.96<br>(0.81,1.14)               |
| <b>0.74</b><br><b>(0.57,0.97)</b> | 1.03<br>(0.83,1.27) | <b>0.81</b><br><b>(0.67,0.98)</b> | 1.07<br>(0.89,1.28) | 0.96<br>(0.81,1.13)      | <b>PCB</b>                        |

Outcomes are expressed as risk ratio (95% confidence intervals). For the pairwise meta-analyses, relative risk less than 1 indicate that the treatment specified in the row is more efficacious. For the network meta-analysis, relative risk less than 1 indicate that the treatment specified in the column is more efficacious. Bold results indicate statistical significance.

Abbreviations: Antiox, antioxidants; ASA-HD, high-dose aspirin; ASA-LD, low-dose aspirin; ASA-VLD, very low-dose aspirin; Calcium, calcium supplements; PCB, placebo; VitD, vitamin D; NA, not available.

**Table S6.2 Results of sensitivity analyses of network meta-analysis: Long-term risk of CRC incidence**

| Intervention                                                                                                                                                                                                                                                                 | RCTs follow-up more than 10 years (main analysis) |            | All RCTs (0-20 years or more)- |            |
|------------------------------------------------------------------------------------------------------------------------------------------------------------------------------------------------------------------------------------------------------------------------------|---------------------------------------------------|------------|--------------------------------|------------|
|                                                                                                                                                                                                                                                                              | RR [95% CI]                                       | SUCRA rank | RR [95% CI]                    | SUCRA rank |
| ASA-HD                                                                                                                                                                                                                                                                       | <b>0.74 [0.57, 0.97]</b>                          | 1          | <b>0.74 [0.57, 0.97]</b>       | 1          |
| ASA-VLD                                                                                                                                                                                                                                                                      | <b>0.81 [0.67, 0.98]</b>                          | 2          | <b>0.81 [0.67, 0.98]</b>       | 2          |
| Calcium+VitD                                                                                                                                                                                                                                                                 | 0.96 [0.81, 1.13]                                 | 3          | 0.96 [0.81, 1.13]              | 3          |
| PCB                                                                                                                                                                                                                                                                          | reference                                         | 4          | reference                      | 5          |
| ASA-LD                                                                                                                                                                                                                                                                       | 1.03 [0.83, 1.27]                                 | 5          | 1.03 [0.83, 1.27]              | 6          |
| Antiox                                                                                                                                                                                                                                                                       | 1.07 [0.89, 1.28]                                 | 6          | 1.07 [0.89, 1.28]              | 7          |
| ASA-VLD+Antiox                                                                                                                                                                                                                                                               | -                                                 | -          | -                              | -          |
| Folic+B12                                                                                                                                                                                                                                                                    | -                                                 | -          | 1.01 [0.56, 1.82]              | 4          |
| Folic+B12+B6                                                                                                                                                                                                                                                                 | -                                                 | -          | 1.15 [0.65, 2.02]              | 8          |
| B6                                                                                                                                                                                                                                                                           | -                                                 | -          | 1.19 [0.68, 2.10]              | 9          |
| Overall inconsistency<br>Chi-square (p value)                                                                                                                                                                                                                                | 0.28 (0.59)                                       |            | 0.62 (0.43)                    |            |
| <b>Number of studies</b>                                                                                                                                                                                                                                                     | <b>7</b>                                          |            | <b>8</b>                       |            |
| Strategies of sensitivity analyses: refer Appendix 2 eTable 2.3<br>Abbreviations: Antiox, antioxidants; ASA-HD, high-dose aspirin; ASA-LD, low-dose aspirin; ASA-VLD, very low-dose aspirin; Calcium, calcium supplements; PCB, placebo; VitD, vitamin D; NA, not available. |                                                   |            |                                |            |

## Supplement 7: Network meta-analyses of CPAs: Long-term risk of CRC mortality

Figure S7.1 Network plot of CPAs: long-term risk of CRC mortality

i. RCTs reported long-term risk of CRC mortality with follow-up more than 10 years (primary analysis)

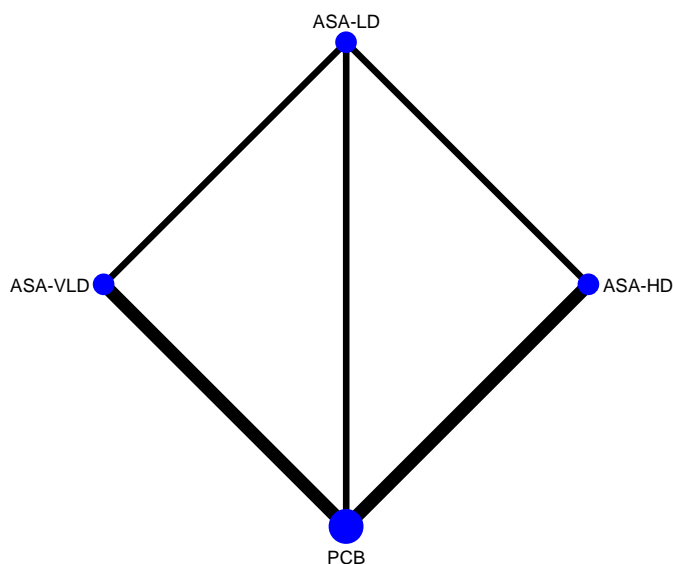

ii. All RCTs reported long-term risk of CRC mortality with follow-up 0-20 years or more

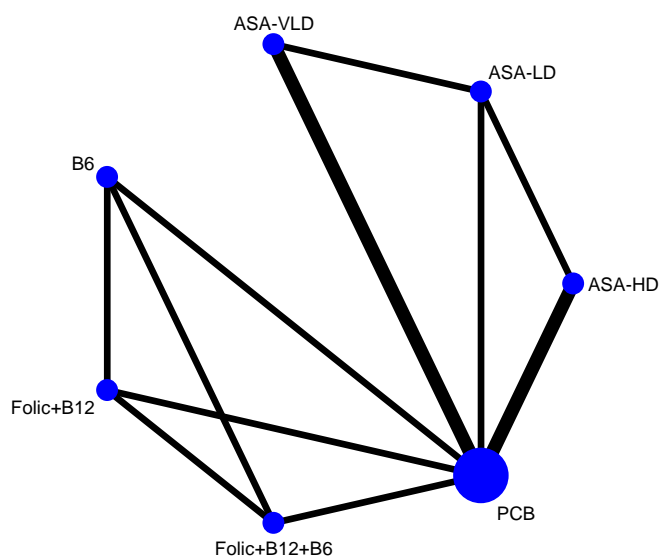

Abbreviations: ASA-HD, high-dose aspirin; ASA-LD, low-dose aspirin; ASA-VLD, very low-dose aspirin; B12, vitamin B12; B6, vitamin B6; Folic, folic acid; PCB, placebo.

**Table S7.1 Results of network meta-analysis: Long-term risk of CRC mortality (RCTs with follow-up more than 10 years: primary analysis)**

| Intervention                                  | RCTs follow-up more than 10 years |            |
|-----------------------------------------------|-----------------------------------|------------|
|                                               | RR [95% CI]                       | SUCRA rank |
| ASA-LD                                        | <b>0.43 [0.23, 0.81]</b>          | 1          |
| ASA-VLD                                       | <b>0.66 [0.45, 0.95]</b>          | 2          |
| ASA-HD                                        | 0.71 [0.50, 1.01]                 | 3          |
| PCB                                           | reference                         | 4          |
| Overall inconsistency<br>Chi-square (p value) | 0.59 (0.745)                      |            |
| <b>Number of studies</b>                      | <b>5</b>                          |            |

Abbreviations: ASA-HD, high-dose aspirin; ASA-LD, low-dose aspirin; ASA-VLD, very low-dose aspirin

**Figure S7.2 SUCRA ranking curve: long-term risk of CRC mortality (RCTs with follow-up more than 10 years)**

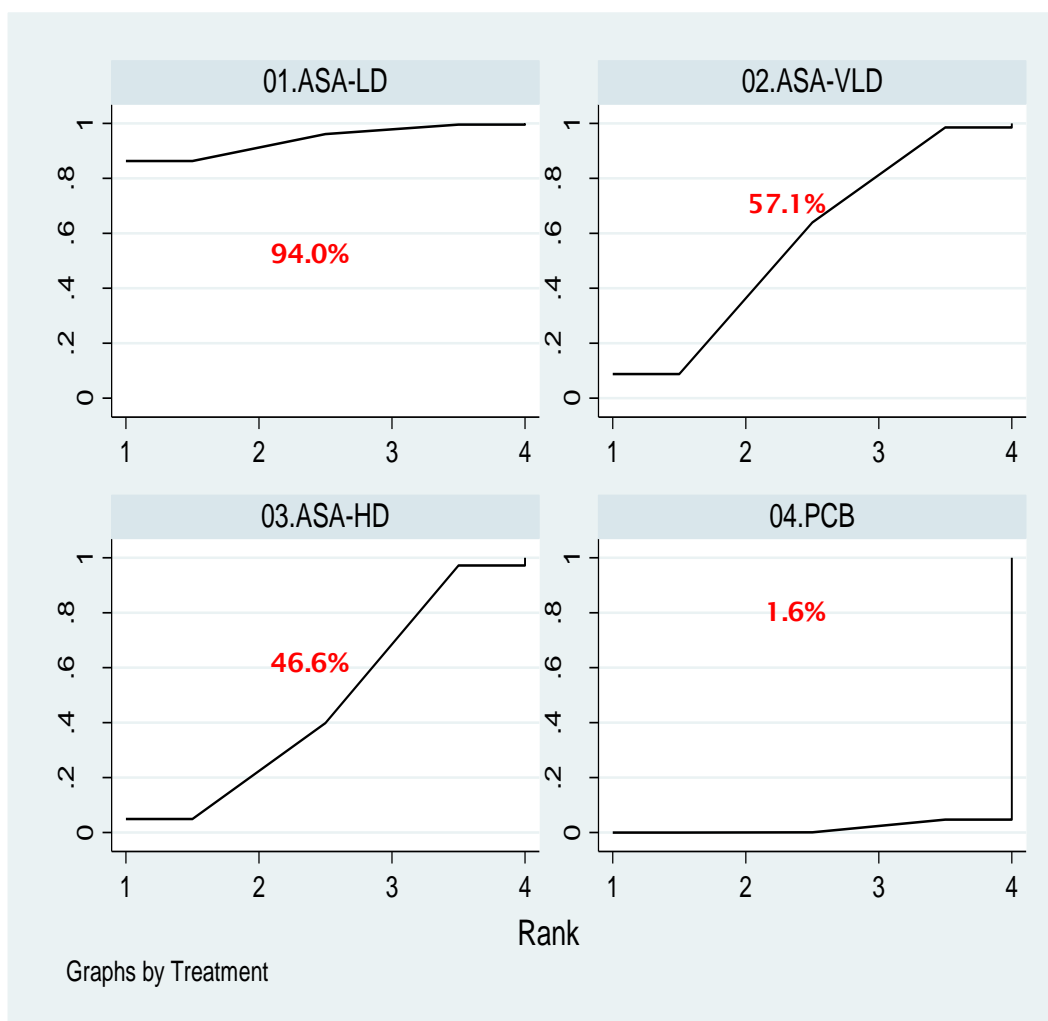

**Abbreviations:** ASA-HD, high-dose aspirin; ASA-LD, low-dose aspirin; ASA-VLD, very low-dose aspirin; PCB, placebo.

Higher SUCRA scores (ranging from 0 to 1) correspond to higher ranking for prevention of CRC incidence and mortality and lower SUCRA scores correspond to higher ranking for safety in terms of CV mortality and GI bleeding events, compared with other CPAs.

**Figure S7.3** Pairwise (upper right portion) and network (lower left portion) meta-analytic results for long-term colorectal cancer mortality



|                     |                             |                             |                             |
|---------------------|-----------------------------|-----------------------------|-----------------------------|
| <b>ASA-HD</b>       | 1.35<br>(0.55,3.33)         | NA                          | 0.72<br>(0.51,1.03)         |
| 1.66<br>(0.84,3.29) | <b>ASA-LD</b>               | 0.49<br>(0.19,1.32)         | 0.50<br>(0.22,1.17)         |
| 1.08<br>(0.66,1.79) | 0.65<br>(0.34,1.25)         | <b>ASA-VLD</b>              | <b>0.63<br/>(0.43,0.93)</b> |
| 0.71<br>(0.50,1.01) | <b>0.43<br/>(0.23,0.81)</b> | <b>0.66<br/>(0.45,0.95)</b> | <b>PCB</b>                  |

---

Outcomes are expressed as risk ratio (95% confidence intervals). For the pairwise meta-analyses, relative risk less than 1 indicate that the treatment specified in the row is more efficacious. For the network meta-analysis, relative risk less than 1 indicate that the treatment specified in the column is more efficacious. Bold results indicate statistical significance.

Abbreviations: ASA-HD, high-dose aspirin; ASA-LD, low-dose aspirin; ASA-VLD, very low-dose aspirin; PCB, placebo; NA, not available.

---

**Note:** NMA results of ASA-LD is not consistent with pairwise meta-analysis results. Pairwise meta-analysis estimate of ASA-LD is from only 1 trial (UK-TIA).<sup>45</sup> However, in our NMA, we were able to incorporate data of the DTIA trial (a trial testing different doses of aspirin (ASA-LD and ASA-VLD) without control)<sup>75</sup> which was not included in the pairwise meta-analysis of earlier studies reporting the long-term risk of CRC mortality.

**Table S7.2 Results of sensitivity analyses of network meta-analysis: Long-term risk of CRC mortality**

| <b>Strategies of sensitivity analyses described in Appendix 2 (section 2e.)</b>                                                                                                                                                                                                  |                                          |                   |                                      |                   |
|----------------------------------------------------------------------------------------------------------------------------------------------------------------------------------------------------------------------------------------------------------------------------------|------------------------------------------|-------------------|--------------------------------------|-------------------|
| <ul style="list-style-type: none"> <li>Follow-up period after initiation of any CPAs: for primary analysis we used RCTs with follow-up &gt;10 years. In sensitivity analysis we included all studies identified reported post-trial data (follow-up 0 to ≥ 20 years).</li> </ul> |                                          |                   |                                      |                   |
| <b>Intervention</b>                                                                                                                                                                                                                                                              | <b>RCTs follow-up more than 10 years</b> |                   | <b>All RCTs (0-20 years or more)</b> |                   |
|                                                                                                                                                                                                                                                                                  | <b>RR [95% CI]</b>                       | <b>SUCRA rank</b> | <b>RR [95% CI]</b>                   | <b>SUCRA rank</b> |
| ASA-LD                                                                                                                                                                                                                                                                           | <b>0.43 [0.23, 0.81]</b>                 | 1                 | <b>0.43 [0.23, 0.81]</b>             | 1                 |
| ASA-VLD                                                                                                                                                                                                                                                                          | <b>0.66 [0.45, 0.95]</b>                 | 2                 | <b>0.66 [0.45, 0.95]</b>             | 3                 |
| ASA-HD                                                                                                                                                                                                                                                                           | 0.71 [0.50, 1.01]                        | 3                 | 0.71 [0.50, 1.01]                    | 4                 |
| PCB                                                                                                                                                                                                                                                                              | reference                                | 4                 | reference                            | 6                 |
| Folic+B12+B6                                                                                                                                                                                                                                                                     | -                                        | -                 | 0.43 [0.11, 1.67]                    | 2                 |
| B6                                                                                                                                                                                                                                                                               | -                                        | -                 | 0.72 [0.23, 2.27]                    | 5                 |
| Folic+B12                                                                                                                                                                                                                                                                        | -                                        | -                 | 1.30 [0.48, 3.48]                    | 7                 |
| Overall inconsistency<br>Chi-square (p value)                                                                                                                                                                                                                                    | 0.59 (0.75)                              |                   | 1.35 (0.51)                          |                   |
| <b>Number of studies</b>                                                                                                                                                                                                                                                         | <b>5</b>                                 |                   | <b>6</b>                             |                   |
| Strategies of sensitivity analyses: Refer Appendix 2 eTable 2.3                                                                                                                                                                                                                  |                                          |                   |                                      |                   |
| Abbreviations: ASA-HD, high-dose aspirin; ASA-LD, low-dose aspirin; ASA-VLD, very low-dose aspirin; B12, vitamin B12; B6, vitamin B6; Folic, folic acid; PCB, placebo.                                                                                                           |                                          |                   |                                      |                   |

## Supplement 8: Network meta-analysis of safety outcomes

We limited this analysis to the three CPAs (high-dose-aspirin, low-dose-aspirin and very-low-dose-aspirin) with evidence of efficacy in reducing long-term CRC incidence or mortality based on the analysis mentioned in the Appendix 6 and 7. Data of safety outcomes provided in **Appendix 3 eTable 3.10**.

### NMA of major GI bleeding events

**Figure S8.1 Network plot of CPAs: Major GI bleeding events**

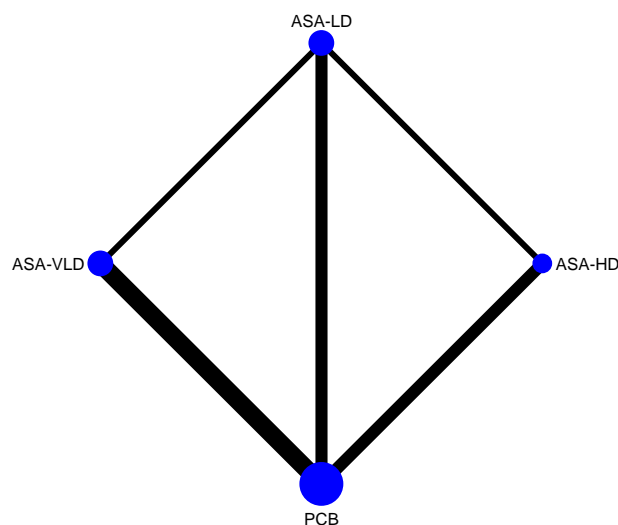

Connecting lines represent head-to-head comparisons, indicated by the connected nodes (size proportional to number of studies). Numbers above and below the lines indicate studies and patient-days respectively. Line thickness is proportional to the number of trials comparing the two strategies. Abbreviations: ASA-HD, high-dose aspirin; ASA-LD, low-dose aspirin; ASA-VLD, very low-dose aspirin; PCB, placebo.

**Table S8.1 Results of network meta-analysis: major GI bleeding events**

| Intervention                                  | RCTs follow-up more than 10 years |                       |
|-----------------------------------------------|-----------------------------------|-----------------------|
|                                               | RR [95% CI]                       | SUCRA rank for safety |
| PCB                                           | reference                         | 1                     |
| ASA-VLD                                       | 1.44 [1.15, 1.81]                 | 2                     |
| ASA-LD                                        | 1.85 [1.22, 2.81]                 | 3                     |
| ASA-HD                                        | 4.04 [1.86, 8.76]                 | 4                     |
|                                               |                                   |                       |
| Overall inconsistency<br>Chi-square (p value) | 1.87 (0.60)                       |                       |
| Number of studies                             | 14                                |                       |

**Figure S8.2 SUCRA ranking curve: major GI bleeding events**

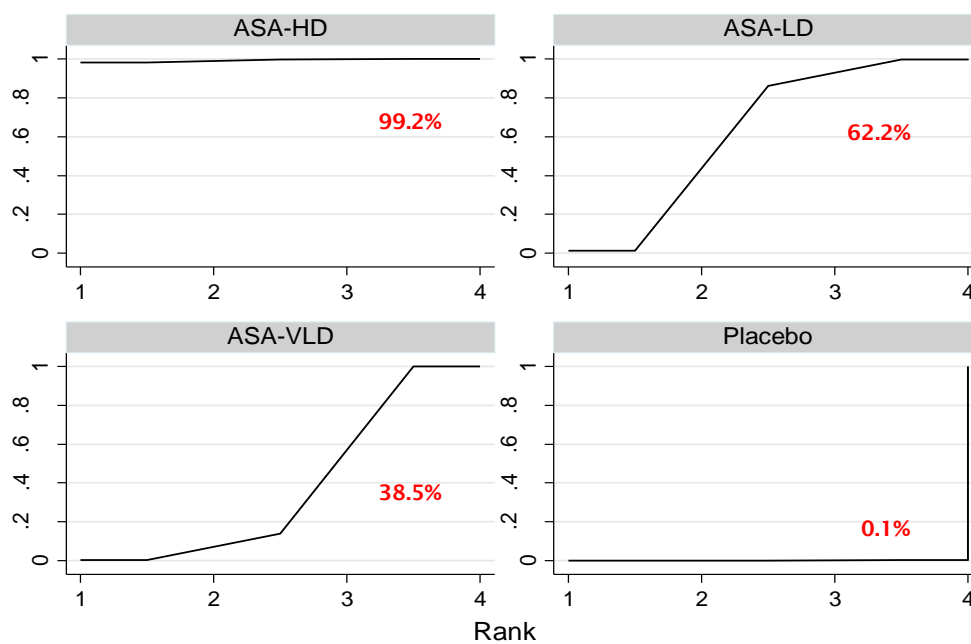

Graphs by Treatment

**Abbreviations:** ASA-HD, high-dose aspirin; ASA-LD, low-dose aspirin; ASA-VLD, very low-dose aspirin; PCB, placebo.

Higher SUCRA scores (ranging from 0 to 1) correspond to higher ranking for prevention of CRC incidence and mortality and lower SUCRA scores correspond to higher ranking for safety in terms of CV mortality and GI bleeding events, compared with other CPAs.

**Figure S8.3 Pairwise (upper right portion) and network (lower left portion) meta-analytic results for major GI bleeding events**

|                     |                     |                     |                      |
|---------------------|---------------------|---------------------|----------------------|
| <b>ASA-HD</b>       | 1.88<br>(0.88,4.01) | NA                  | 7.76<br>(2.07,29.16) |
| 2.18<br>(1.08,4.41) | <b>ASA-LD</b>       | NA                  | 1.88<br>(1.22,2.90)  |
| 2.80<br>(1.25,6.26) | 1.28<br>(0.80,2.05) | <b>ASA-VLD</b>      | 1.44<br>(1.14,1.80)  |
| 4.04<br>(1.86,8.76) | 1.85<br>(1.22,2.81) | 1.44<br>(1.15,1.81) | <b>PCB</b>           |

---

Outcomes are expressed as risk ratio (95% confidence intervals). For the pairwise meta-analyses, relative risk less than 1 indicate that the treatment specified in the row is more efficacious. For the network meta-analysis, relative risk less than 1 indicate that the treatment specified in the column is more efficacious. Bold and shaded results indicate statistical significance.

Abbreviations: ASA-HD, high-dose aspirin; ASA-LD, low-dose aspirin; ASA-VLD, very low-dose aspirin; PCB, placebo; NA, not available.

---

## NMA of cardiovascular (CV) mortality

Figure S8.4 Network plot of CPAs: CV mortality

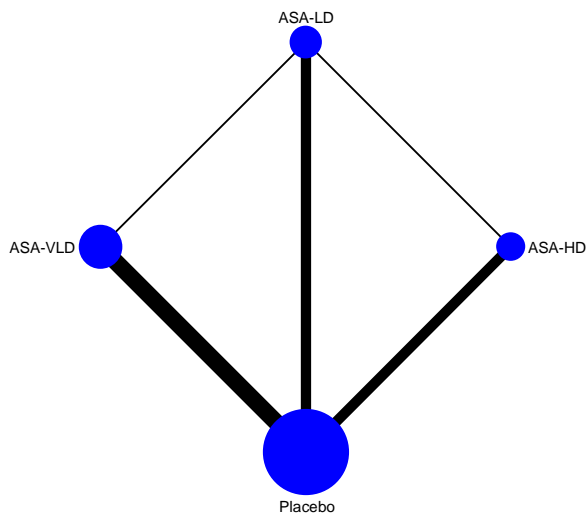

Table S8.2 Results of network meta-analysis: CV mortality

| Intervention                                  | RCTs follow-up more than 10 years |                       |
|-----------------------------------------------|-----------------------------------|-----------------------|
|                                               | RR [95% CI]                       | SUCRA rank for safety |
| ASA-LD                                        | 0.89 [0.77, 1.02]                 | 1                     |
| ASA-VLD                                       | 0.92 [0.82, 1.03]                 | 2                     |
| ASA-HD                                        | 0.93 [0.83, 1.04]                 | 3                     |
| PCB                                           | reference                         | 4                     |
| Overall inconsistency<br>Chi-square (p value) | 1.61 (0.657)                      |                       |
| <b>Number of studies</b>                      | <b>22</b>                         |                       |

**Figure S8.5 SUCRA ranking curve: CV mortality**

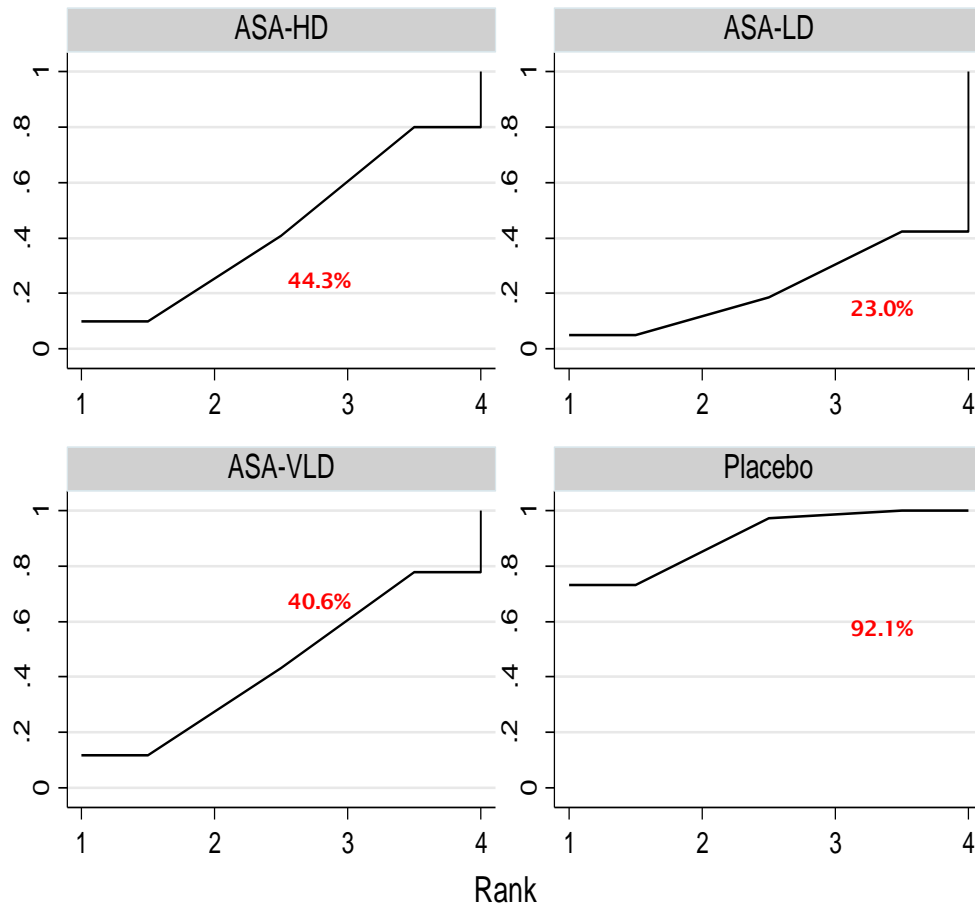

Graphs by Treatment

Higher SUCRA scores (ranging from 0 to 1) correspond to higher ranking for prevention of CRC incidence and mortality and lower SUCRA scores correspond to higher ranking for safety in terms of CV mortality and GI bleeding events, compared with other CPAs.

Abbreviations: ASA-HD, high-dose aspirin; ASA-LD, low-dose aspirin; ASA-VLD, very low-dose aspirin; PCB, placebo

**Figure S8.6 Pairwise (upper right portion) and network (lower left portion) meta-analytic results for CV mortality**

|                     |                     |                     |                     |
|---------------------|---------------------|---------------------|---------------------|
| <b>ASA-HD</b>       | 1.01<br>(0.76,1.35) | NA                  | 0.94<br>(0.84,1.05) |
| 1.05<br>(0.88,1.25) | <b>ASA-LD</b>       | 1.04<br>(0.88,1.23) | 0.87<br>(0.76,1.01) |
| 1.01<br>(0.86,1.18) | 0.96<br>(0.81,1.14) | <b>ASA-VLD</b>      | 0.91<br>(0.77,1.07) |
| 0.93<br>(0.83,1.04) | 0.89<br>(0.77,1.02) | 0.92<br>(0.82,1.03) | <b>PCB</b>          |

---

Outcomes are expressed as risk ratio (95% confidence intervals). For the pairwise meta-analyses, relative risk less than 1 indicate that the treatment specified in the row is more efficacious. For the network meta-analysis, relative risk less than 1 indicate that the treatment specified in the column is more efficacious. Bold and shaded results indicate statistical significance.

Abbreviations: ASA-HD, high-dose aspirin; ASA-LD, low-dose aspirin; ASA-VLD, very low-dose aspirin; PCB, placebo; NA, not available.

---



## Supplement 9: Assessment of inconsistency for each outcome network

**Table S9.1 Assessment of inconsistency: early risk of CRC incidence**

Assessment of global inconsistency in networks using the 'design-by-treatment' interaction model

| Network outcome                                          | Chi-square | P value for test of global inconsistency |
|----------------------------------------------------------|------------|------------------------------------------|
| Early risk of CRC incidence (all RCTs)                   | 3.53       | 0.74                                     |
| Early risk of CRC incidence (RCTs with low risk of bias) | 1.56       | 0.67                                     |

**Table S9.2 Assessment of inconsistency: long-term risk of CRC incidence or mortality**

Assessment of global inconsistency in networks using the 'design-by-treatment' interaction model

| Network outcome                                                          | Chi-square | P value for test of global inconsistency |
|--------------------------------------------------------------------------|------------|------------------------------------------|
| Long-term risk of CRC incidence (RCTs with follow-up more than 10 years) | 0.28       | 0.597                                    |
| Long-term risk of CRC incidence (RCTs with follow-up 0-20 years)         | 0.62       | 0.43                                     |
| Long-term risk of CRC mortality (RCTs with follow-up more than 10 years) | 0.59       | 0.75                                     |
| Long-term risk of CRC mortality (RCTs with follow-up 0-20 years)         | 1.35       | 0.51                                     |

**Table S9.3 Assessment of inconsistency: safety outcomes****i. Assessment of global inconsistency in networks using the ‘design-by-treatment’ interaction model**

| <b>Network outcome</b>                       | <b>Chi-square</b> | <b>P value for test of global inconsistency</b> |
|----------------------------------------------|-------------------|-------------------------------------------------|
| Incidence of major gastrointestinal bleeding | 1.87              | 0.60                                            |
| Incidence of CV mortality                    | 1.61              | 0.66                                            |

## Supplement 10: Comparison-adjusted funnel plot for each outcome form the network meta-analyses

**Figure S10.1 Comparison-adjusted funnel plots from the network meta-analyses:  
Early risk of CRC incidence**

### i. All RCTs

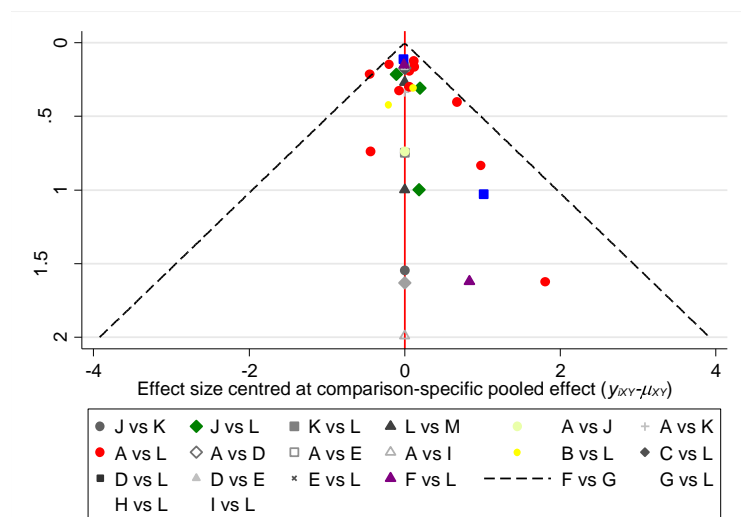

A, Antioxidant; B, ASA-HD; C, ASA-LD; D, ASA-VLD; E, ASA-VLD+AO; F, Calcium; G, calcium+vitaminD; H, Folic acid; I, Folic+B12; J, Folic+B12+B6; K, Folic+ B12+B6+antioxidant; KL Placebo; M, vitamin D

### ii. RCTs with low ROB

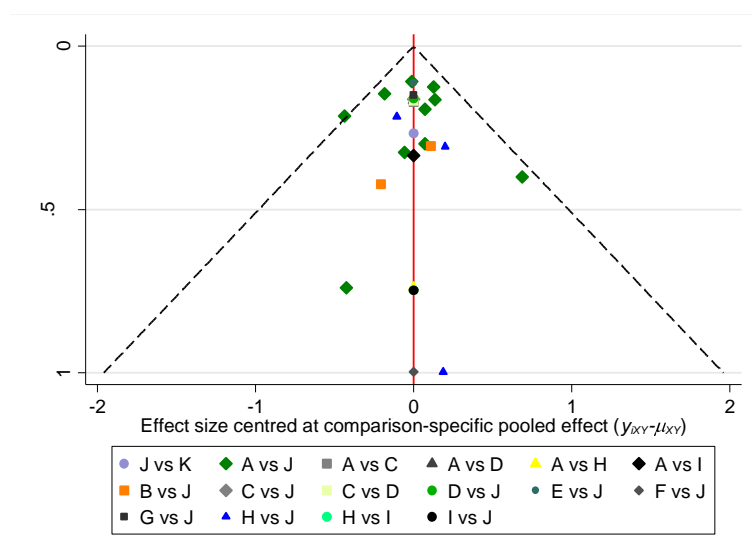

A, Antioxidant; B, ASA-HD; C, ASA-LD; D, ASA-VLD; E, ASA-VLD+AO; F, Calcium; G, calcium+vitaminD; H, Folic acid; I, Folic+B12; J, Folic+B12+B6; K, Folic+ B12+B6+antioxidant; KL Placebo; M, vitamin D

**Figure S10.2 Comparison-adjusted funnel plots from the network meta-analyses: long-term risk of CRC incidence**

**i. RCTs reported long-term CRC incidence with follow-up more than 10 years**

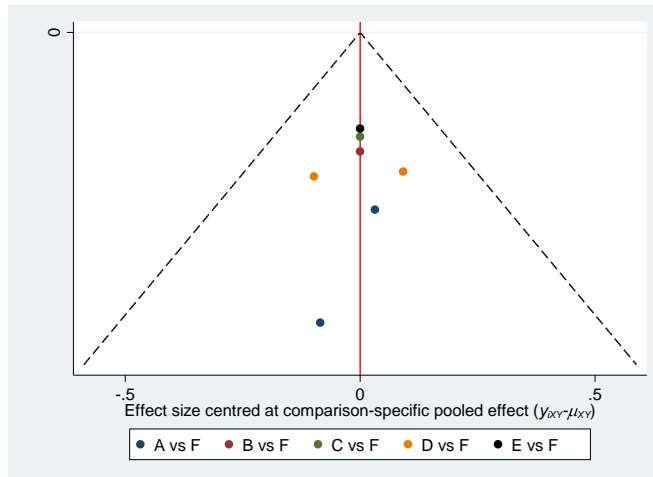

A, ASA-HD; B, ASA-LD; C, ASA-VLD; D, Antiox; E, Calcium+VitD; F, PCB.

**ii. All RCTs reported long-term CRC incidence with follow-up 0-20 years or more**

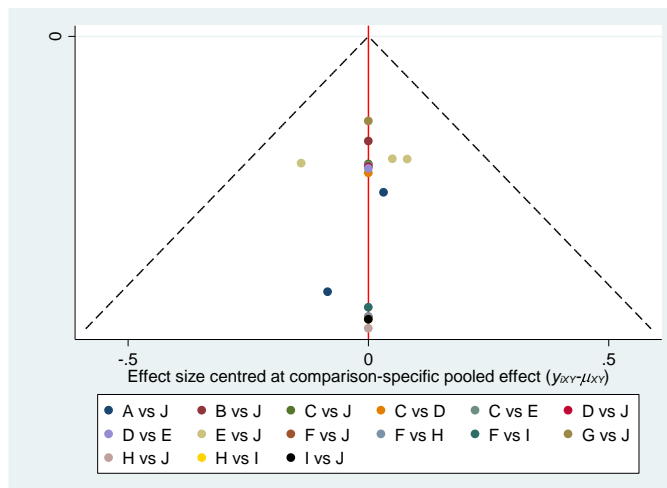

A, ASA-HD; B, ASA-LD; C, ASA-VLD; D, ASA-VLD+Antiox; E, Antiox; F, B6; G, Calcium+VitD; H, Folic+B12; I, Folic+B12+B6; J, PCB.

**Figure S10.3 Comparison-adjusted funnel plots from the network meta-analyses: long-term risk of CRC mortality**

**i. RCTs reported long-term CRC incidence with follow-up more than 10 years**

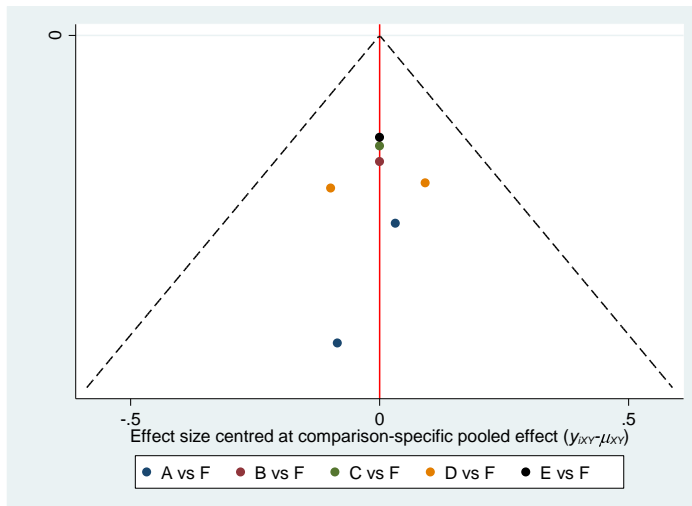

A, ASA-HD; B, ASA-LD; C, ASA-VLD; D, Antiox; E, Calcium+VitD; F, PCB.

**ii. All RCTs reported long-term CRC incidence with follow-up 0-20 years or more**

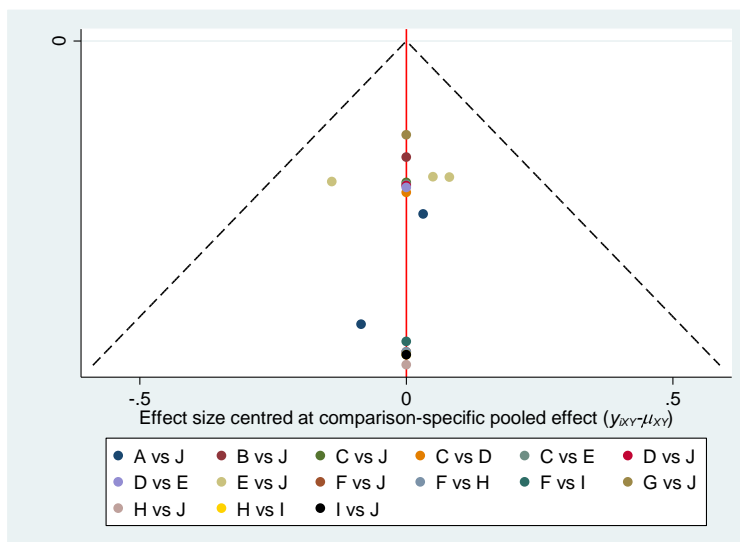

A, ASA-HD; B, ASA-LD; C, ASA-VLD; D, ASA-VLD+Antiox; E, Antiox; F, B6; G, Calcium+VitD; H, Folic+B12; I, Folic+B12+B6; J, PCB.

**Figure S10.4 Comparison-adjusted funnel plots from the network meta-analyses: major GI bleeding events**

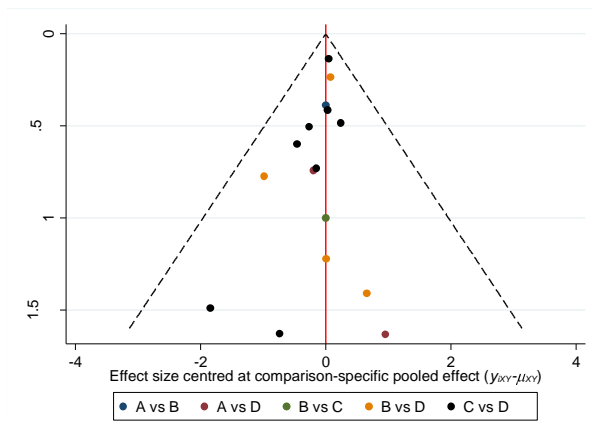

**Figure S10.5 Comparison-adjusted funnel plots from the network meta-analyses: CV mortality**

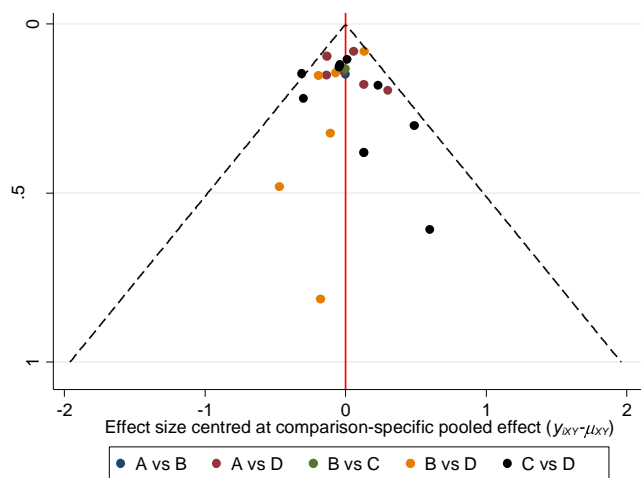

### Supplement 11: GRADE Summary of evidence

The Grading of Recommendations, Assessment, Development and Evaluation (GRADE) approach adapted to network meta-analysis was used to rate the quality of evidence into four levels <sup>21</sup>: high, moderate, low and very low quality. In this approach, direct estimates from RCTs rated at high quality and can be graded down to moderate, low and very-low quality based on risk of bias, indirectness, imprecision, inconsistency and publication bias. The rating of the quality of the indirect estimates starts at the lowest rating of the two direct estimates that contribute to the indirect estimate of the comparison of interest as first order loops. In the presence of intransitivity, indirect estimate can be further rate down from the lower of the confidence ratings of the contributing direct comparisons. Finally, if both direct and indirect evidence are available then the higher of the two quality ratings can be assigned to the quality rating for NMA estimates.

| Comparisons                    | Direct evidence<br>(from pairwise meta-analysis) |                        | Indirect evidence<br>(from node-splitting) |                         | Difference | Network meta-analysis |                        |
|--------------------------------|--------------------------------------------------|------------------------|--------------------------------------------|-------------------------|------------|-----------------------|------------------------|
|                                | RR<br>[95% CI]                                   | Quality of<br>evidence | RR<br>[95% CI]                             | Quality of<br>evidence  | P value    | RR<br>[95% CI]        | Quality of<br>evidence |
| <b>Long-term CRC incidence</b> |                                                  |                        |                                            |                         |            |                       |                        |
| ASA-HD vs. Placebo             | 0.74<br>[0.57, 0.97]                             | Very low <sup>a</sup>  | NA                                         | NA                      | -          | 0.74<br>[0.57, 0.97]  | Very low               |
| ASA-LD vs. Placebo             | 1.03<br>[0.83, 1.27]                             | Very low <sup>b</sup>  | NA                                         | NA                      | -          | 1.03<br>[0.83, 1.27]  | Very low               |
| ASA-VLD vs. Placebo            | 0.81<br>[0.67, 0.98]                             | Low <sup>c</sup>       | NA                                         | NA                      | -          | 0.81<br>[0.67, 0.98]  | Low                    |
| ASA-HD vs ASA-LD               | NA                                               | NA                     | 0.72 [0.51,1.01]                           | Very low <sup>d</sup>   | -          | 0.72 [0.51,1.01]      | Very low               |
| ASA-HD vs ASA-VLD              | NA                                               | NA                     | 0.91 [0.66, 1.26]                          | Very low <sup>d</sup>   | -          | 0.91 [0.66,<br>1.26]  | Very low               |
| ASA-LD vs ASA-VLD              | NA                                               | NA                     | 1.27 [0.96,1.68]                           | Very low <sup>d</sup>   | -          | 1.27 [0.96,1.68]      | Very low               |
| <b>Long-term CRC mortality</b> |                                                  |                        |                                            |                         |            |                       |                        |
| ASA-HD vs. Placebo             | 0.72<br>[0.51, 1.03]                             | Very low <sup>a</sup>  | 0.26<br>[0.02, 3.65]                       | Very low <sup>d</sup>   | 0.45       | 0.71<br>[0.50, 1.01]  | Very low               |
| ASA-LD vs. Placebo             | 0.50<br>[0.22, 1.17]                             | Low <sup>e</sup>       | 0.37<br>[0.15, 0.90]                       | Very Low <sup>d,f</sup> | 0.66       | 0.43<br>[0.23, 0.81]  | Low                    |
| ASA-VLD vs. Placebo            | 0.63<br>[0.43, 0.93]                             | Moderate <sup>g</sup>  | 1.04<br>[0.30, 3.65]                       | Very low <sup>d,f</sup> | 0.45       | 0.66<br>[0.45, 0.95]  | Moderate               |

|                    |                      |                  |                      |                         |      |                      |          |
|--------------------|----------------------|------------------|----------------------|-------------------------|------|----------------------|----------|
| ASA-HD vs. ASA-LD  | 1.35<br>[0.55, 3.33] | Low <sup>h</sup> | 2.08<br>[0.78, 5.55] | Very low <sup>d,f</sup> | 0.54 | 1.66<br>[0.84, 3.29] | Low      |
| ASA-HD vs. ASA-VLD | NA                   | NA               | 1.08<br>[0.66, 1.79] | Very low <sup>d,f</sup> | -    | 1.08<br>[0.66, 1.79] | Very low |
| ASA-LD vs. ASA-VLD | 0.49<br>[0.19, 1.32] | Low <sup>h</sup> | 0.82<br>[0.34, 1.98] | Very Low <sup>d,f</sup> | 0.45 | 0.65<br>[0.34, 1.25] | Very low |

Randomized controlled trials (RCTs) without important limitations are rated high on the GRADE scale. However, the above results are from long term observational follow-up of RCTs with proper random sequence generation during intervention phase. Hence the initial quality rating starts with moderate level.

- a. Risk of bias (One RCT is open control); indirectness (dose and treatment duration variation); imprecision (close to null effect)
- b. Short duration of follow-up; only 12 years; imprecision
- c. Imprecision (close to null effect)
- d. Based on rating of the two pairwise estimates that contributes to the indirect estimate (first order loop)
- e. Imprecision
- f. Intransitivity
- g. Indirectness (dose 30-75 mg/day and treatment duration variation)
- h. Indirectness (treatment duration and follow-up)

**Long-term CRC incidence:** No triangular or quadratic loops found for node-splitting.



## Supplement 12: Net clinical benefit analysis

**Table S12.1 Pooled risk estimates and net clinical benefit of treatment options compared with placebo**

| Treatment                          | Pooled risk estimates (%) |                      |                      | Risk ratio (network meta-analysis) |                      |                      | Net survival gain (%) |
|------------------------------------|---------------------------|----------------------|----------------------|------------------------------------|----------------------|----------------------|-----------------------|
|                                    | Mortality due to CRC      | Mortality due to CV  | Major GIB            | Mortality due to CRC               | Mortality due to CV  | Major GIB            |                       |
| <b>ASA-HD</b>                      | 1.473 (0.853, 2.462)      | 4.741 (3.438, 6.315) | 1.385 (0.307, 4.564) | 0.714 (0.503, 1.013)               | 0.928 (0.826, 1.043) | 4.037 (1.861, 8.760) | 0.908 (0.416, 1.342)  |
| <b>ASA-LD</b>                      | 0.885 (0.385, 1.967)      | 4.528 (3.206, 6.173) | 0.635 (0.201, 1.465) | 0.429 (0.227, 0.809)               | 0.886 (0.770, 1.020) | 1.851 (1.218, 2.812) | 1.736 (1.010, 2.434)  |
| <b>ASA-VLD</b>                     | 1.360 (0.772, 2.321)      | 4.708 (3.420, 6.258) | 0.495 (0.190, 0.942) | 0.659 (0.455, 0.955)               | 0.922 (0.821, 1.034) | 1.442 (1.150, 1.808) | 1.091 (0.614, 1.573)  |
| <b>PCB (reference)<sup>†</sup></b> | 2.063 (1.696, 2.430)      | 5.109 (4.164, 6.053) | 0.343 (0.165, 0.521) | 1                                  | 1                    | 1                    | -                     |

1. All of treatment was significantly better than placebo.

2. ASA-LD seems to be the most effective regimen.

<sup>†</sup> Pooled risk estimate of the treatment with PCB (reference) was calculated by using meta-analyses of proportions (calculated by using meta-analyses of proportions in Stata with metaprop command).

Abbreviations: ASA-HD, high-dose aspirin; ASA-LD, low-dose aspirin; ASA-VLD, very low-dose aspirin; CRC, colorectal cancer; CV, cardiovascular; GIB, gastrointestinal bleeding; PCB, placebo.

**Table S12.2 Combined risk estimates of mortality from CRC and CV and pooled risk estimates of major GI bleeding (for scatter plot).**

| Treatment | Risk estimates for CRC mortality (%) | Risk estimates for CV mortality (%) | Risk estimates for CRC and CV mortality (%) | Risk estimates for GI bleeding (%) |
|-----------|--------------------------------------|-------------------------------------|---------------------------------------------|------------------------------------|
| ASA-HD    | 1.467                                | 4.738                               | 6.205                                       | 1.400                              |
| ASA-LD    | 0.894                                | 4.529                               | 5.422                                       | 0.640                              |
| ASA-VLD   | 1.370                                | 4.705                               | 6.076                                       | 0.499                              |
| PCB       | 2.066                                | 2.066                               | 7.176                                       | 0.346                              |

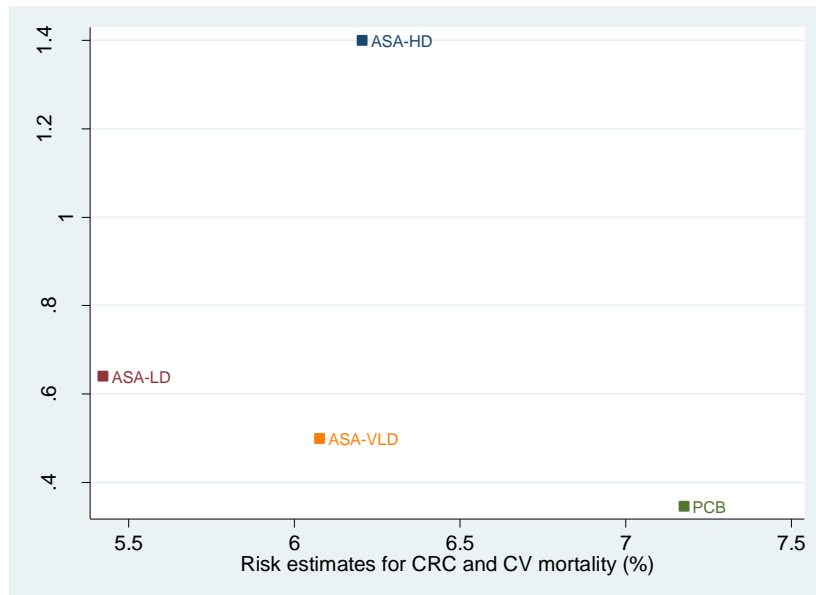

**Figure S12.1 Sensitivity analyses of net clinical benefit by varying weighting factors from 0.01 to 0.16**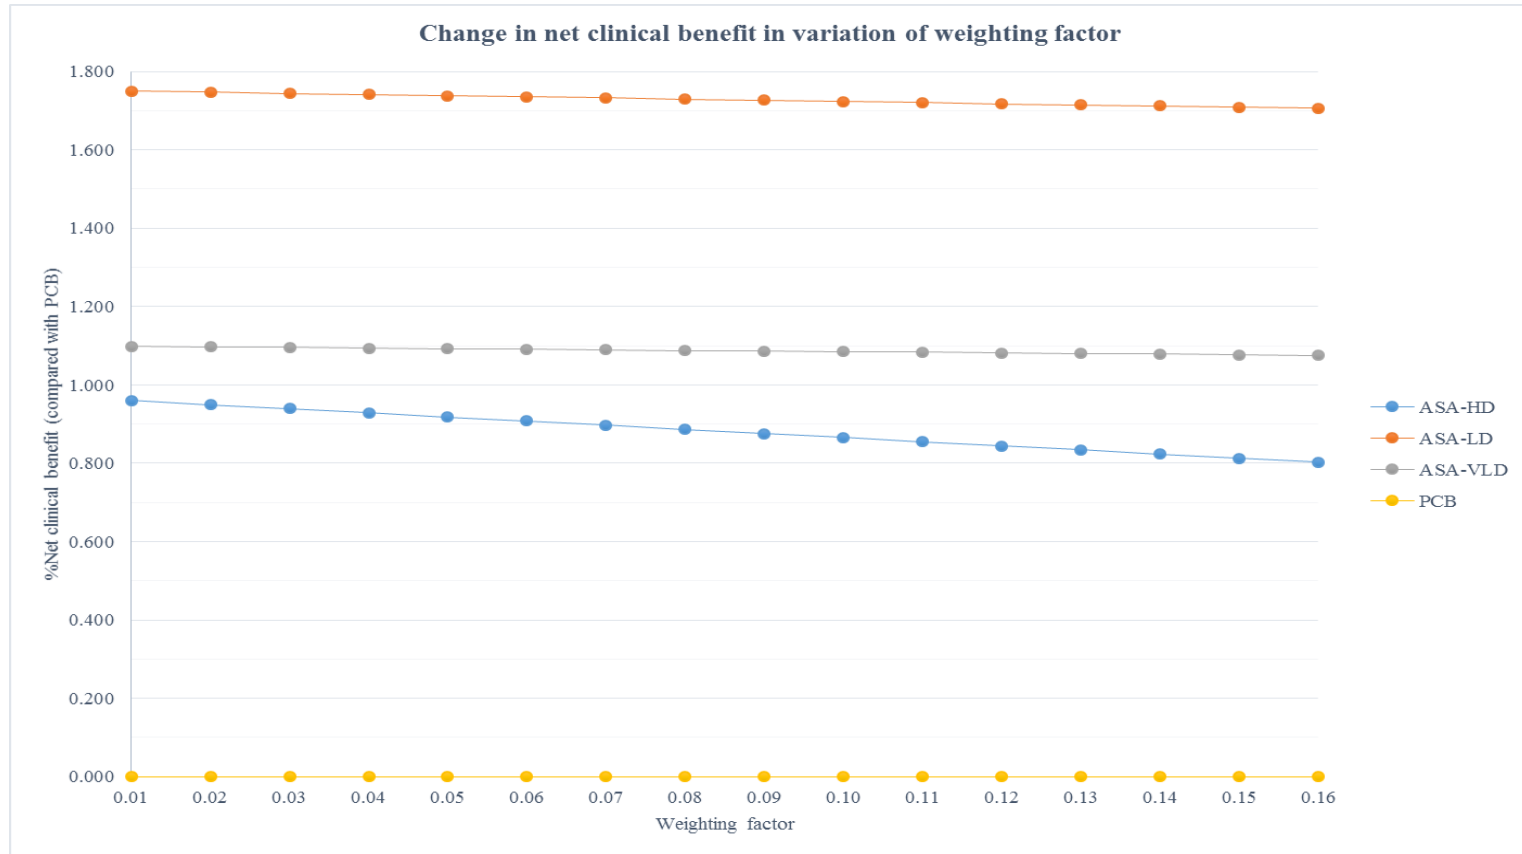

Note: Based on the sensitivity analysis, the benefit declines when increasing of weighting factor (which indicates that the benefit from mortality prevention will not be warrant if severe bleeding occurs).

## **Method S12.1 Explanation why low-dose aspirin was gained the most clinical benefit?**

First, although there is no significant difference in the efficacy of mortality prevention from CRC (RR 0.65; 95% CI 0.34, 1.25) and CV cause (RR 0.96; 95% CI 0.81, 1.14) between low and very-low dose aspirin, low-dose aspirin has better ranking than very low-dose aspirin in our network comparison for aforementioned outcomes. Second, the difference of major GI bleeding between these two regimens was small. As seen in eTable 12.1, the pooled risk estimates of major GI bleeding for low-dose aspirin and very low-dose aspirin were 0.635 (95% CI 0.201, 1.465) and 0.495 (95% CI 0.190, 0.942), respectively. Therefore, the magnitude of benefit gain from mortality prevention from CRC and CV cause are much higher than death from GI bleeding. Previous meta-analysis<sup>96</sup> conducted by the Antithrombotic Trialists' Collaboration to investigate effects of antiplatelet therapy among patients at high risk of occlusive vascular events also demonstrated that aspirin in doses from 75 to 325 mg daily appears to be the effective dose for the prevention of vascular events without differences in risk of major extracranial bleeding across dose ranges. However, we caution the reader to carefully interpret and apply our result in the current practice since it does not clear that low-dose aspirin provide a significance level of benefit gain than very low-dose aspirin (%Net survival gain for low-dose and very low-dose aspirin were 1.736 [95% CI 1.010, 2.434] and 1.091 [95% CI 0.614, 1.573], respectively).

**Figure S12.2 Threshold analyses by varying the weight for case-fatality ratio of GI bleeding**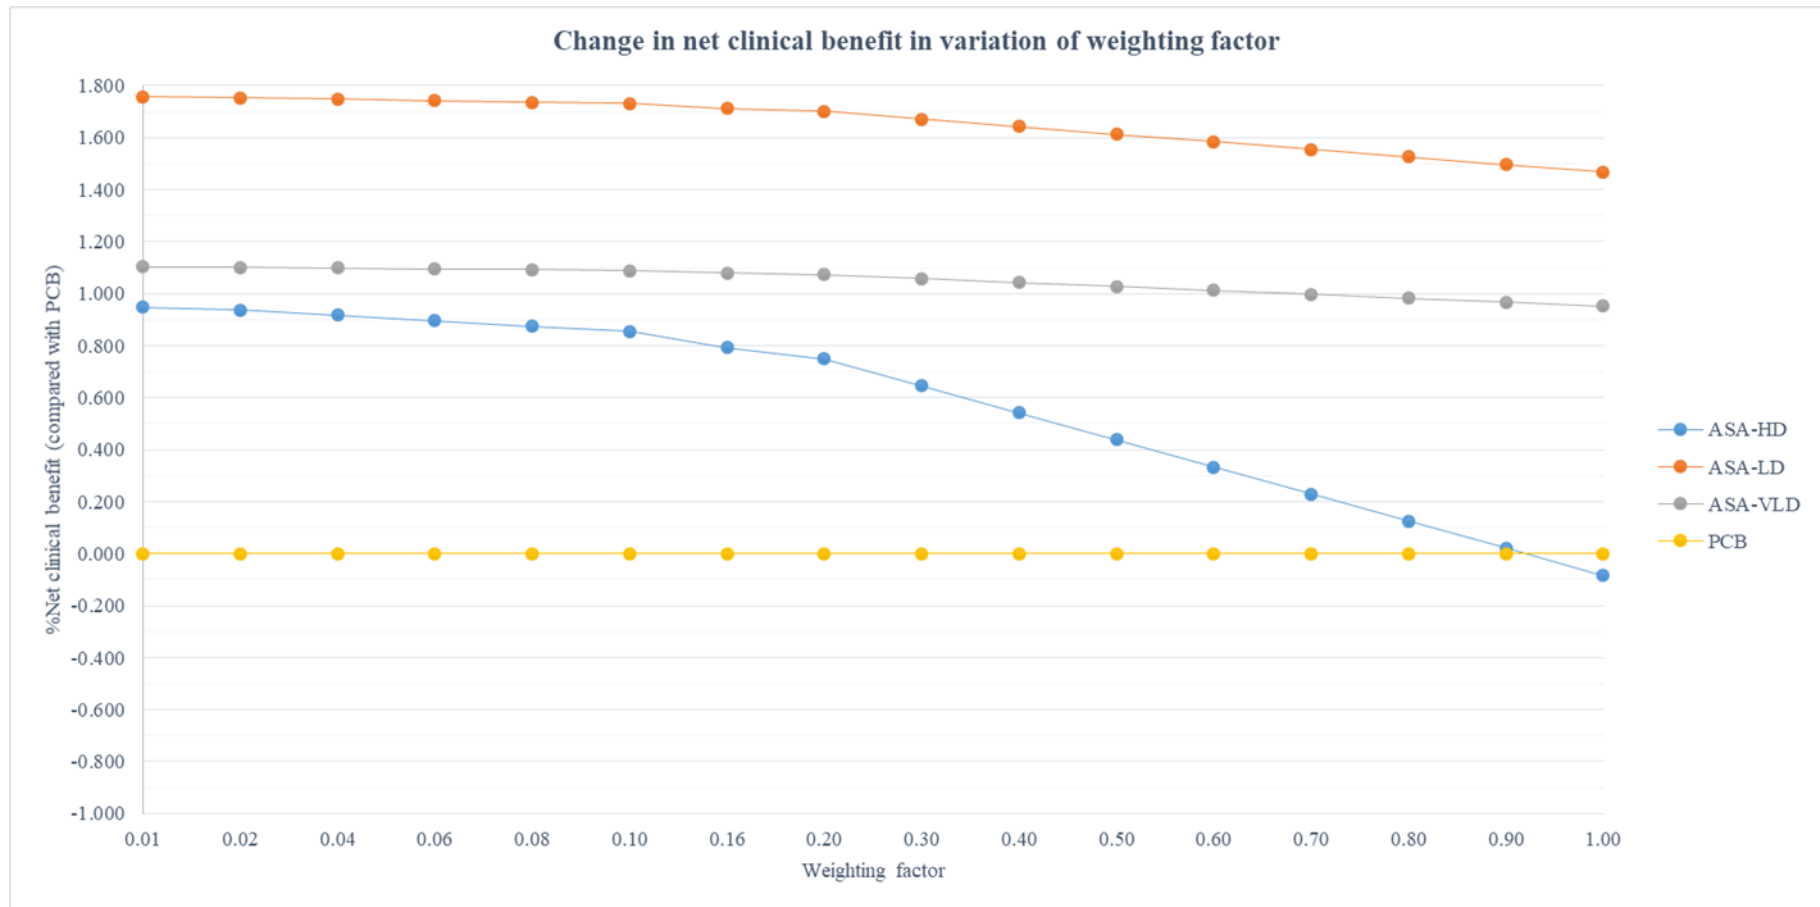

Figure S12.3 Threshold analyses by varying the incidence of GI bleeding.

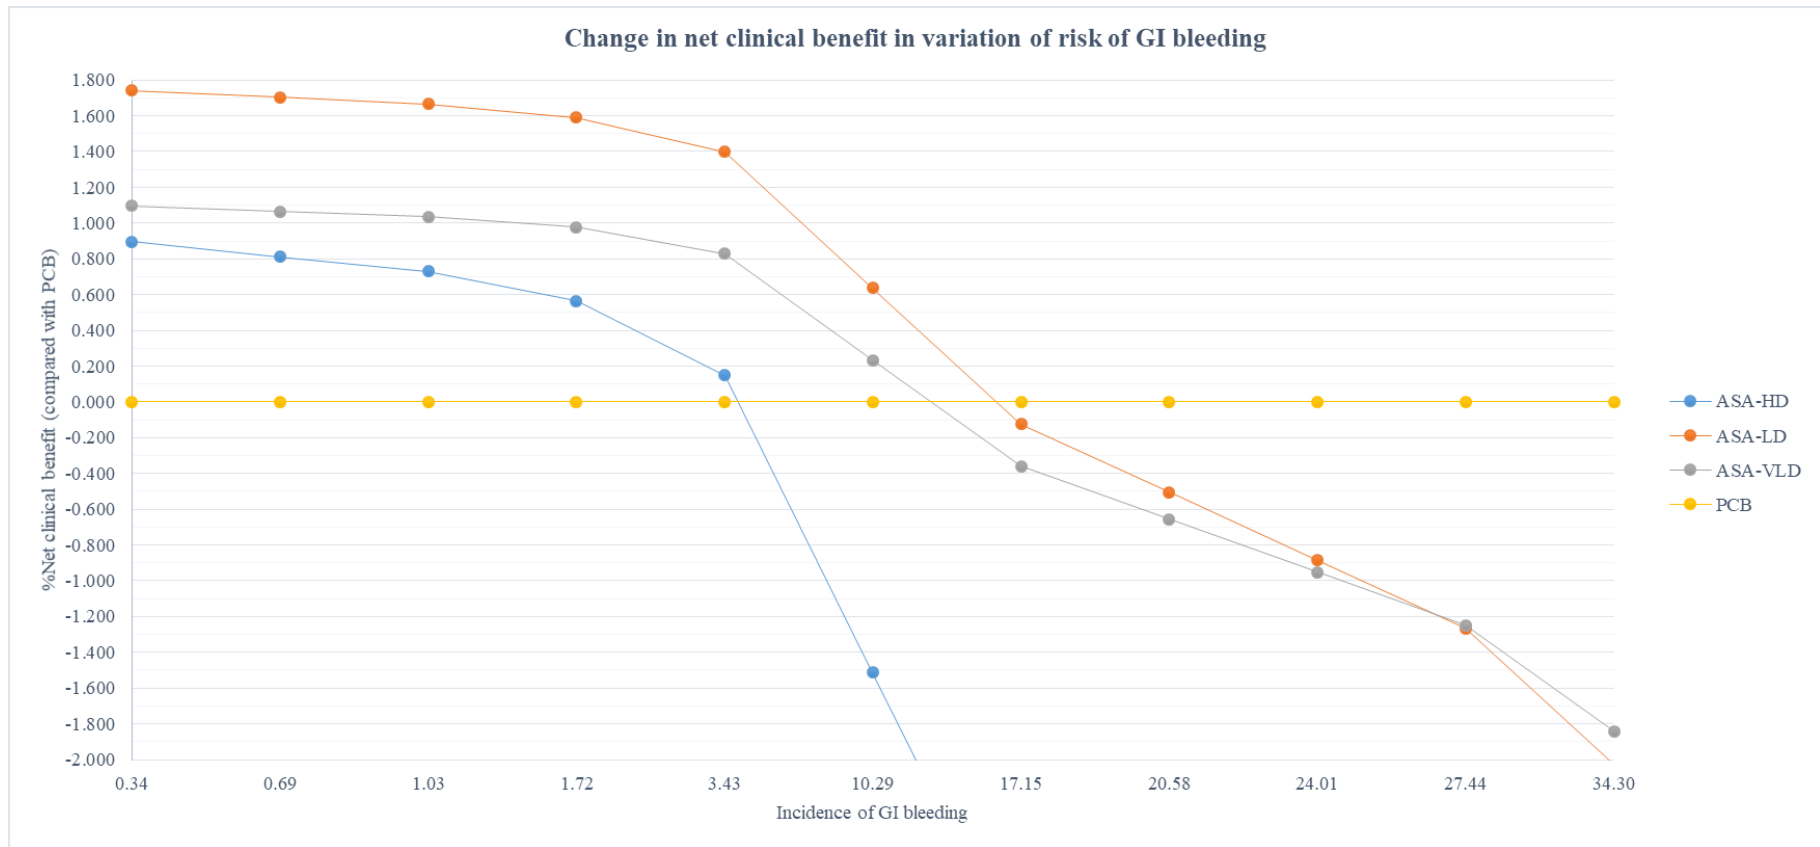

## Reference

1. Veettil S.K., Saokaew S., Lim K.G., Ching S.M., Phisalprapa P., Chaiyakunapruk N. Comparative effectiveness of chemopreventive interventions for colorectal cancer: Protocol for a systematic review and network meta-analysis of randomised controlled trials. *Journal of Gastrointestinal Oncology*. <http://jgo.amegroups.com/article/download/7346/pdf>. Published 2016.
2. Veettil SK, Teerawattanapong N, Ching SM, et al. Effects of chemopreventive agents on the incidence of recurrent colorectal adenomas: a systematic review with network meta-analysis of randomized controlled trials. *OncoTargets Ther*. 2017;10:2689-2700. doi:10.2147/OTT.S127335
3. Virtamo J, Pietinen P, Huttunen JK, et al. Incidence of cancer and mortality following alpha-tocopherol and beta-carotene supplementation: a postintervention follow-up. *JAMA*. 2003;290(4):476-485. doi:10.1001/jama.290.4.476
4. Goodman GE, Thornquist MD, Balmes J, et al. The Beta-Carotene and Retinol Efficacy Trial: incidence of lung cancer and cardiovascular disease mortality during 6-year follow-up after stopping beta-carotene and retinol supplements. *J Natl Cancer Inst*. 2004;96(23):1743-1750. doi:10.1093/jnci/djh320
5. Ebbing M, Bønaa K, Nygård O, et al. Cancer incidence and mortality after treatment with folic acid and vitamin b12. *JAMA*. 2009;302(19):2119-2126. doi:10.1001/jama.2009.1622
6. Cook NR, Lee I-M, Zhang SM, Moorthy MV, Buring JE. Alternate-day, low-dose aspirin and cancer risk: long-term observational follow-up of a randomized trial. *Ann Intern Med*. 2013;159(2):77-85. doi:10.7326/0003-4819-159-2-201307160-00002
7. Cauley JA, Chlebowski RT, Wactawski-Wende J, et al. Calcium plus vitamin D supplementation and health outcomes five years after active intervention ended: the Women's Health Initiative. *J Womens Health 2002*. 2013;22(11):915-929. doi:10.1089/jwh.2013.4270
8. Stürmer T, Glynn RJ, Lee IM, Manson JE, Buring JE, Hennekens CH. Aspirin use and colorectal cancer: post-trial follow-up data from the Physicians' Health Study. *Ann Intern Med*. 1998;128(9):713-720.
9. Flossmann E, Rothwell PM, British Doctors Aspirin Trial and the UK-TIA Aspirin Trial. Effect of aspirin on long-term risk of colorectal cancer: consistent evidence from randomised and observational studies. *Lancet Lond Engl*. 2007;369(9573):1603-1613. doi:10.1016/S0140-6736(07)60747-8
10. Rothwell PM, Wilson M, Elwin C-E, et al. Long-term effect of aspirin on colorectal cancer incidence and mortality: 20-year follow-up of five randomised trials. *Lancet Lond Engl*. 2010;376(9754):1741-1750. doi:10.1016/S0140-6736(10)61543-7
11. Gaziano JM, Sesso HD, Christen WG, et al. Multivitamins in the prevention of cancer in men: the Physicians' Health Study II randomized controlled trial. *JAMA*. 2012;308(18):1871-1880. doi:10.1001/jama.2012.14641
12. Gaziano JM, Glynn RJ, Christen WG, et al. Vitamins E and C in the prevention of prostate and total cancer in men: the Physicians' Health Study II randomized controlled trial. *JAMA*. 2009;301(1):52-62. doi:10.1001/jama.2008.862

13. Cook NR, Lee I-M, Gaziano JM, et al. Low-dose aspirin in the primary prevention of cancer: the Women's Health Study: a randomized controlled trial. *JAMA*. 2005;294(1):47-55. doi:10.1001/jama.294.1.47
14. Lin J, Cook NR, Albert C, et al. Vitamins C and E and beta carotene supplementation and cancer risk: a randomized controlled trial. *J Natl Cancer Inst*. 2009;101(1):14-23. doi:10.1093/jnci/djn438
15. Cook NR, Albert CM, Gaziano JM, et al. A randomized factorial trial of vitamins C and E and beta carotene in the secondary prevention of cardiovascular events in women: results from the Women's Antioxidant Cardiovascular Study. *Arch Intern Med*. 2007;167(15):1610-1618. doi:10.1001/archinte.167.15.1610
16. Zhang SM, Cook NR, Albert CM, Gaziano J, Buring JE, Manson JE. Effect of combined folic acid, vitamin b6, and vitamin b12 on cancer risk in women: A randomized trial. *JAMA*. 2008;300(17):2012-2021. doi:10.1001/jama.2008.555
17. Brenner H, Altenhofen L, Stock C, Hoffmeister M. Expected long-term impact of the German screening colonoscopy programme on colorectal cancer prevention: analyses based on 4,407,971 screening colonoscopies. *Eur J Cancer Oxf Engl 1990*. 2015;51(10):1346-1353. doi:10.1016/j.ejca.2015.03.020
18. McAlister FA, Straus SE, Sackett DL, Altman DG. Analysis and reporting of factorial trials: a systematic review. *JAMA*. 2003;289(19):2545-2553. doi:10.1001/jama.289.19.2545
19. Chubak J, Kamineni A, Buist DS, Anderson ML, Whitlock EP. *Aspirin Use for the Prevention of Colorectal Cancer: An Updated Systematic Evidence Review for the U.S. Preventive Services Task Force*. Rockville (MD): Agency for Healthcare Research and Quality (US); 2015. <http://www.ncbi.nlm.nih.gov/books/NBK321661/>. Accessed December 14, 2016.
20. Whitlock EP, Williams SB, Burda BU, Feightner A, Beil T. *Aspirin Use in Adults: Cancer, All-Cause Mortality, and Harms: A Systematic Evidence Review for the U.S. Preventive Services Task Force*. Rockville (MD): Agency for Healthcare Research and Quality (US); 2015. <http://www.ncbi.nlm.nih.gov/books/NBK321643/>. Accessed December 14, 2016.
21. Puhan MA, Schünemann HJ, Murad MH, et al. A GRADE Working Group approach for rating the quality of treatment effect estimates from network meta-analysis. *BMJ*. 2014;349:g5630. doi:10.1136/bmj.g5630
22. Gann PH, Manson JE, Glynn RJ, Buring JE, Hennekens CH. Low-Dose Aspirin and Incidence of Colorectal Tumors in a Randomized Trial. *J Natl Cancer Inst*. 1993;85(15):1220-1224. doi:10.1093/jnci/85.15.1220
23. Hennekens CH, Buring JE, Manson JE, et al. Lack of effect of long-term supplementation with beta carotene on the incidence of malignant neoplasms and cardiovascular disease. *N Engl J Med*. 1996;334(18):1145-1149. doi:10.1056/NEJM199605023341801
24. Lonn E, Held C, Arnold JMO, et al. Rationale, design and baseline characteristics of a large, simple, randomized trial of combined folic acid and vitamins B6 and B12 in high-risk patients: the Heart Outcomes Prevention Evaluation (HOPE)-2 trial. *Can J Cardiol*. 2006;22(1):47-53.



25. Lonn E, Bosch J, Yusuf S, et al. Effects of long-term vitamin E supplementation on cardiovascular events and cancer: a randomized controlled trial. *JAMA*. 2005;293(11):1338-1347. doi:10.1001/jama.293.11.1338
26. Lonn E, Yusuf S, Arnold MJ, et al. Homocysteine lowering with folic acid and B vitamins in vascular disease. *N Engl J Med*. 2006;354(15):1567-1577. doi:10.1056/NEJMoa060900
27. Lee I-M, Cook NR, Gaziano JM, et al. Vitamin E in the primary prevention of cardiovascular disease and cancer: the Women's Health Study: a randomized controlled trial. *JAMA*. 2005;294(1):56-65. doi:10.1001/jama.294.1.56
28. Bønaa KH, Njølstad I, Ueland PM, et al. Homocysteine lowering and cardiovascular events after acute myocardial infarction. *N Engl J Med*. 2006;354(15):1578-1588. doi:10.1056/NEJMoa055227
29. Ebbing M, Bleie Ø, Ueland PM, et al. Mortality and cardiovascular events in patients treated with homocysteine-lowering B vitamins after coronary angiography: a randomized controlled trial. *JAMA*. 2008;300(7):795-804. doi:10.1001/jama.300.7.795
30. Guirguis-Blake JM, Evans CV, Senger CA, O'Connor EA, Whitlock EP. Aspirin for the Primary Prevention of Cardiovascular Events: A Systematic Evidence Review for the U.S. Preventive Services Task Force. *Ann Intern Med*. 2016;164(12):804-813. doi:10.7326/M15-2113
31. Whitlock EP, Burda BU, Williams SB, Guirguis-Blake JM, Evans CV. Bleeding Risks With Aspirin Use for Primary Prevention in Adults: A Systematic Review for the U.S. Preventive Services Task Force. *Ann Intern Med*. 2016;164(12):826-835. doi:10.7326/M15-2112
32. Chatterjee S, Chakraborty A, Weinberg I, et al. Thrombolysis for pulmonary embolism and risk of all-cause mortality, major bleeding, and intracranial hemorrhage: a meta-analysis. *JAMA*. 2014;311(23):2414-2421. doi:10.1001/jama.2014.5990
33. Jinatongthai P, Kongwatcharapong J, Foo CY, et al. Comparative efficacy and safety of reperfusion therapy with fibrinolytic agents in patients with ST-segment elevation myocardial infarction: a systematic review and network meta-analysis. *The Lancet*. 2017;390(10096):747-759. doi:10.1016/S0140-6736(17)31441-1
34. Dehmer SP, Maciosek MV, Flottemesch TJ. *Aspirin Use to Prevent Cardiovascular Disease and Colorectal Cancer: A Decision Analysis: Technical Report*. Rockville (MD): Agency for Healthcare Research and Quality (US); 2015. <http://www.ncbi.nlm.nih.gov/books/NBK321651/>. Accessed December 14, 2016.
35. Dehmer SP, Maciosek MV, Flottemesch TJ, LaFrance AB, Whitlock EP. Aspirin for the Primary Prevention of Cardiovascular Disease and Colorectal Cancer: A Decision Analysis for the U.S. Preventive Services Task Force. *Ann Intern Med*. 2016;164(12):777-786. doi:10.7326/M15-2129
36. Lanas A, Perez-Aisa MA, Feu F, et al. A nationwide study of mortality associated with hospital admission due to severe gastrointestinal events and those associated with nonsteroidal antiinflammatory drug use. *Am J Gastroenterol*. 2005;100(8):1685-1693. doi:10.1111/j.1572-0241.2005.41833.x
37. Rockall TA, Logan RF, Devlin HB, Northfield TC. Incidence of and mortality from acute upper gastrointestinal haemorrhage in the United Kingdom. Steering Committee and members of the National Audit of Acute Upper Gastrointestinal Haemorrhage. *BMJ*. 1995;311(6999):222-226.

38. Straube S, Tramèr MR, Moore RA, Derry S, McQuay HJ. Mortality with upper gastrointestinal bleeding and perforation: effects of time and NSAID use. *BMC Gastroenterol.* 2009;9:41. doi:10.1186/1471-230X-9-41
39. Fang MC, Go AS, Chang Y, et al. Death and disability from warfarin-associated intracranial and extracranial hemorrhages. *Am J Med.* 2007;120(8):700-705. doi:10.1016/j.amjmed.2006.07.034
40. Elwood PC, Morgan G, Galante J, et al. Systematic Review and Meta-Analysis of Randomised Trials to Ascertain Fatal Gastrointestinal Bleeding Events Attributable to Preventive Low-Dose Aspirin: No Evidence of Increased Risk. *PLoS One.* 2016;11(11):e0166166. doi:10.1371/journal.pone.0166166
41. Nyaga VN, Arbyn M, Aerts M. Metaprop: a Stata command to perform meta-analysis of binomial data. *Arch Public Health.* 2014;72:39. doi:10.1186/2049-3258-72-39
42. Efron, B., & Tibshirani, R. *An Introduction to the Bootstrap.* Boca Raton, Fla: Chapman & Hall/CRC.; 1993.
43. Singer DE, Chang Y, Fang MC, et al. The net clinical benefit of warfarin anticoagulation in atrial fibrillation. *Ann Intern Med.* 2009;151(5):297-305.
44. Peto R, Gray R, Collins R, et al. Randomised trial of prophylactic daily aspirin in British male doctors. *Br Med J Clin Res Ed.* 1988;296(6618):313-316.
45. Farrell B, Godwin J, Richards S, Warlow C. The United Kingdom transient ischaemic attack (UK-TIA) aspirin trial: final results. *J Neurol Neurosurg Psychiatry.* 1991;54(12):1044-1054.
46. Omenn GS, Goodman GE, Thornquist MD, et al. Risk factors for lung cancer and for intervention effects in CARET, the Beta-Carotene and Retinol Efficacy Trial. *J Natl Cancer Inst.* 1996;88(21):1550-1559.
47. Omenn GS, Goodman GE, Thornquist MD, et al. Effects of a Combination of Beta Carotene and Vitamin A on Lung Cancer and Cardiovascular Disease. *N Engl J Med.* 1996;334(18):1150-1155. doi:10.1056/NEJM199605023341802
48. Heart Protection Study Collaborative Group. MRC/BHF Heart Protection Study of antioxidant vitamin supplementation in 20,536 high-risk individuals: a randomised placebo-controlled trial. *Lancet Lond Engl.* 2002;360(9326):23-33. doi:10.1016/S0140-6736(02)09328-5
49. Duffield-Lillico AJ, Reid ME, Turnbull BW, et al. Baseline characteristics and the effect of selenium supplementation on cancer incidence in a randomized clinical trial: a summary report of the Nutritional Prevention of Cancer Trial. *Cancer Epidemiol Biomark Prev Publ Am Assoc Cancer Res Cosponsored Am Soc Prev Oncol.* 2002;11(7):630-639.
50. Clark LC, Combs GF, Turnbull BW, et al. Effects of selenium supplementation for cancer prevention in patients with carcinoma of the skin. A randomized controlled trial. Nutritional Prevention of Cancer Study Group. *JAMA.* 1996;276(24):1957-1963.
51. Albanes D, Malila N, Taylor PR, et al. Effects of supplemental alpha-tocopherol and beta-carotene on colorectal cancer: results from a controlled trial (Finland). *Cancer Causes Control CCC.* 2000;11(3):197-205.

52. Group TA-TBCCPS. The Effect of Vitamin E and Beta Carotene on the Incidence of Lung Cancer and Other Cancers in Male Smokers. *N Engl J Med*. 1994;330(15):1029-1035. doi:10.1056/NEJM199404143301501
53. Trivedi DP, Doll R, Khaw KT. Effect of four monthly oral vitamin D3 (cholecalciferol) supplementation on fractures and mortality in men and women living in the community: randomised double blind controlled trial. *BMJ*. 2003;326(7387):469.
54. Zhu S, Mason J, Shi Y, et al. The effect of folic acid on the development of stomach and other gastrointestinal cancers. *Chin Med J (Engl)*. 2003;116(1):15-19.
55. Hercberg S, Galan P, Preziosi P, et al. The SU.VI.MAX Study: a randomized, placebo-controlled trial of the health effects of antioxidant vitamins and minerals. *Arch Intern Med*. 2004;164(21):2335-2342. doi:10.1001/archinte.164.21.2335
56. Hercberg S, Preziosi P, Briançon S, et al. A primary prevention trial using nutritional doses of antioxidant vitamins and minerals in cardiovascular diseases and cancers in a general population: the SU.VI.MAX study--design, methods, and participant characteristics. SUpplementation en Vitamines et Minéraux AntioXydants. *Control Clin Trials*. 1998;19(4):336-351.
57. Investigators THOPES. Effects of an Angiotensin-Converting-Enzyme Inhibitor, Ramipril, on Cardiovascular Events in High-Risk Patients. *N Engl J Med*. 2000;342(3):145-153. doi:10.1056/NEJM200001203420301
58. Wactawski-Wende J, Kotchen JM, Anderson GL, et al. Calcium plus Vitamin D Supplementation and the Risk of Colorectal Cancer. *N Engl J Med*. 2006;354(7):684-696. doi:10.1056/NEJMoa055222
59. Lappe JM, Travers-Gustafson D, Davies KM, Recker RR, Heaney RP. Vitamin D and calcium supplementation reduces cancer risk: results of a randomized trial. *Am J Clin Nutr*. 2007;85(6):1586-1591.
60. Lippman SM, Klein EA, Goodman PJ, et al. Effect of selenium and vitamin E on risk of prostate cancer and other cancers: the Selenium and Vitamin E Cancer Prevention Trial (SELECT). *JAMA*. 2009;301(1):39-51. doi:10.1001/jama.2008.864
61. Study of the Effectiveness of Additional Reductions in Cholesterol and Homocysteine (SEARCH) Collaborative Group, Armitage JM, Bowman L, et al. Effects of homocysteine-lowering with folic acid plus vitamin B12 vs placebo on mortality and major morbidity in myocardial infarction survivors: a randomized trial. *JAMA*. 2010;303(24):2486-2494. doi:10.1001/jama.2010.840
62. Study of the Effectiveness of Additional Reductions in Cholesterol and Homocysteine (SEARCH) Collaborative Group. Intensive lowering of LDL cholesterol with 80 mg versus 20 mg simvastatin daily in 12 064 survivors of myocardial infarction: a double-blind randomised trial. *Lancet*. 2010;376(9753):1658-1669. doi:10.1016/S0140-6736(10)60310-8
63. Hankey GJ, Eikelboom JW, Yi Q, et al. Treatment With B Vitamins and Incidence of Cancer in Patients With Previous Stroke or Transient Ischemic Attack Results of a Randomized Placebo-Controlled Trial. *Stroke*. 2012;43(6):1572-1577. doi:10.1161/STROKEAHA.111.641613
64. VITATOPS Trial Study Group. B vitamins in patients with recent transient ischaemic attack or stroke in the VITAMins TO Prevent Stroke (VITATOPS) trial: a randomised, double-blind,

- parallel, placebo-controlled trial. *Lancet Neurol.* 2010;9(9):855-865. doi:10.1016/S1474-4422(10)70187-3
65. Gao Q-Y, Chen H-M, Chen Y-X, et al. Folic Acid Prevents the Initial Occurrence of Sporadic Colorectal Adenoma in Chinese Older than 50 Years of Age: A Randomized Clinical Trial. *Cancer Prev Res (Phila Pa).* 2013;6(7):744-752. doi:10.1158/1940-6207.CAPR-13-0013
  66. Albanes D, Heinonen OP, Huttunen JK, et al. Effects of alpha-tocopherol and beta-carotene supplements on cancer incidence in the Alpha-Tocopherol Beta-Carotene Cancer Prevention Study. *Am J Clin Nutr.* 1995;62(6 Suppl):1427S-1430S.
  67. Albanes D, Heinonen OP, Taylor PR, et al. Alpha-Tocopherol and beta-carotene supplements and lung cancer incidence in the alpha-tocopherol, beta-carotene cancer prevention study: effects of base-line characteristics and study compliance. *J Natl Cancer Inst.* 1996;88(21):1560-1570.
  68. Jackson RD, LaCroix AZ, Gass M, et al. Calcium plus vitamin D supplementation and the risk of fractures. *N Engl J Med.* 2006;354(7):669-683. doi:10.1056/NEJMoa055218
  69. Final report on the aspirin component of the ongoing Physicians' Health Study. Steering Committee of the Physicians' Health Study Research Group. *N Engl J Med.* 1989;321(3):129-135. doi:10.1056/NEJM198907203210301
  70. Cooper K, Squires H, Carroll C, et al. Chemoprevention of colorectal cancer: systematic review and economic evaluation. *Health Technol Assess Winch Engl.* 2010;14(32):1-206. doi:10.3310/hta14320
  71. Bjelakovic G, Nagorni A, Nikolova D, Simonetti RG, Bjelakovic M, Gluud C. Meta-analysis: antioxidant supplements for primary and secondary prevention of colorectal adenoma. *Aliment Pharmacol Ther.* 2006;24(2):281-291. doi:10.1111/j.1365-2036.2006.02970.x
  72. Lee IM, Cook NR, Manson JE, Buring JE, Hennekens CH. Beta-carotene supplementation and incidence of cancer and cardiovascular disease: the Women's Health Study. *J Natl Cancer Inst.* 1999;91(24):2102-2106.
  73. Group TSC. Swedish Aspirin Low-dose Trial (SALT) of 75 mg aspirin as secondary prophylaxis after cerebrovascular ischaemic events. *The Lancet.* 1991;338(8779):1345-1349. doi:10.1016/0140-6736(91)92233-R
  74. Thrombosis prevention trial: randomised trial of low-intensity oral anticoagulation with warfarin and low-dose aspirin in the primary prevention of ischaemic heart disease in men at increased risk. The Medical Research Council's General Practice Research Framework. *Lancet Lond Engl.* 1998;351(9098):233-241.
  75. A comparison of two doses of aspirin (30 mg vs. 283 mg a day) in patients after a transient ischemic attack or minor ischemic stroke. The Dutch TIA Trial Study Group. *N Engl J Med.* 1991;325(18):1261-1266. doi:10.1056/NEJM199110313251801
  76. Harris RP, Helfand M, Woolf SH, et al. Current methods of the US Preventive Services Task Force: a review of the process. *Am J Prev Med.* 2001;20(3 Suppl):21-35.
  77. Belch J, MacCuish A, Campbell I, et al. The prevention of progression of arterial disease and diabetes (POPADAD) trial: factorial randomised placebo controlled trial of aspirin and

- antioxidants in patients with diabetes and asymptomatic peripheral arterial disease. *BMJ*. 2008;337:a1840.
78. Ridker PM, Cook NR, Lee I-M, et al. A Randomized Trial of Low-Dose Aspirin in the Primary Prevention of Cardiovascular Disease in Women. *N Engl J Med*. 2005;352(13):1293-1304. doi:10.1056/NEJMoa050613
  79. de Gaetano G, Collaborative Group of the Primary Prevention Project. Low-dose aspirin and vitamin E in people at cardiovascular risk: a randomised trial in general practice. Collaborative Group of the Primary Prevention Project. *Lancet Lond Engl*. 2001;357(9250):89-95.
  80. Aspirin effects on mortality and morbidity in patients with diabetes mellitus. Early Treatment Diabetic Retinopathy Study report 14. ETDRS Investigators. *JAMA*. 1992;268(10):1292-1300.
  81. Fowkes FGR, Price JF, Stewart MCW, et al. Aspirin for Prevention of Cardiovascular Events in a General Population Screened for a Low Ankle Brachial Index: A Randomized Controlled Trial. *JAMA*. 2010;303(9):841-848. doi:10.1001/jama.2010.221
  82. Hansson L, Zanchetti A, Carruthers SG, et al. Effects of intensive blood-pressure lowering and low-dose aspirin in patients with hypertension: principal results of the Hypertension Optimal Treatment (HOT) randomised trial. HOT Study Group. *Lancet Lond Engl*. 1998;351(9118):1755-1762.
  83. Ogawa H, Nakayama M, Morimoto T, et al. Low-dose aspirin for primary prevention of atherosclerotic events in patients with type 2 diabetes: a randomized controlled trial. *JAMA*. 2008;300(18):2134-2141. doi:10.1001/jama.2008.623
  84. Silagy CA, McNeil JJ, Donnan GA, Tonkin AM, Worsam B, Campion K. Adverse effects of low-dose aspirin in a healthy elderly population. *Clin Pharmacol Ther*. 1993;54(1):84-89.
  85. A randomized, controlled trial of aspirin in persons recovered from myocardial infarction. *JAMA*. 1980;243(7):661-669.
  86. Brighton TA, Eikelboom JW, Mann K, et al. Low-Dose Aspirin for Preventing Recurrent Venous Thromboembolism. *N Engl J Med*. 2012;367(21):1979-1987. doi:10.1056/NEJMoa1210384
  87. Aspirin in coronary heart disease. The Coronary Drug Project Research Group. *Circulation*. 1980;62(6 Pt 2):V59-62.
  88. Côté R, Battista RN, Abrahamowicz M, Langlois Y, Bourque F, Mackey A. Lack of effect of aspirin in asymptomatic patients with carotid bruits and substantial carotid narrowing. The Asymptomatic Cervical Bruit Study Group. *Ann Intern Med*. 1995;123(9):649-655.
  89. European Stroke Prevention Study 2. Efficacy and safety data. *J Neurol Sci*. 1997;151 Suppl:S1-77.
  90. Secondary prevention in non-rheumatic atrial fibrillation after transient ischaemic attack or minor stroke. EAFT (European Atrial Fibrillation Trial) Study Group. *Lancet Lond Engl*. 1993;342(8882):1255-1262.
  91. Juul-Möller S, Edvardsson N, Jahnmatz B, Rosén A, Sørensen S, Omblus R. Double-blind trial of aspirin in primary prevention of myocardial infarction in patients with stable chronic angina

- pectoris. The Swedish Angina Pectoris Aspirin Trial (SAPAT) Group. *Lancet Lond Engl.* 1992;340(8833):1421-1425.
92. Persantine and aspirin in coronary heart disease. The Persantine-Aspirin Reinfarction Study Research Group. *Circulation.* 1980;62(3):449-461.
  93. Petersen P, Boysen G, Godtfredsen J, Andersen ED, Andersen B. Placebo-controlled, randomised trial of warfarin and aspirin for prevention of thromboembolic complications in chronic atrial fibrillation. The Copenhagen AFASAK study. *Lancet Lond Engl.* 1989;1(8631):175-179.
  94. Sato H, Ishikawa K, Kitabatake A, et al. Low-dose aspirin for prevention of stroke in low-risk patients with atrial fibrillation: Japan Atrial Fibrillation Stroke Trial. *Stroke.* 2006;37(2):447-451. doi:10.1161/01.STR.0000198839.61112.ee
  95. Stroke Prevention in Atrial Fibrillation Study. Final results. *Circulation.* 1991;84(2):527-539.
  96. Antithrombotic Trialists' Collaboration. Collaborative meta-analysis of randomised trials of antiplatelet therapy for prevention of death, myocardial infarction, and stroke in high risk patients. *BMJ.* 2002;324(7329):71-86.
